# Supplementary material for: Reduced Pseudomonas aeruginosa Cell Size Observed on Planktonic Cultures Grown in the International Space Station
Source: MDPI journal article supplement (doi:10.3390/microorganisms12020393), 2024-02-16
Supplement: s1 [file s1]

**Table S1:** Cell length and diameter measurements according to gravity, day of fixation, replicate, medium and coupon material.

| Sample | Replicate | Day | Gravity | Medium | Material | Length (μm) | Diameter (μm) | Cell ID |
|--------|-----------|-----|---------|--------|----------|-------------|---------------|---------|
| G1.1   | 1         | 1   | 1 g     | LBK    | SS316    | 0.929       | 0.388         | 1       |
| G1.1   | 1         | 1   | 1 g     | LBK    | SS316    | 0.708       | 0.271         | 2       |
| G1.1   | 1         | 1   | 1 g     | LBK    | SS316    | 0.879       | 0.267         | 3       |
| G1.1   | 1         | 1   | 1 g     | LBK    | SS316    | 0.938       | 0.287         | 4       |
| G1.1   | 1         | 1   | 1 g     | LBK    | SS316    | 0.701       | 0.354         | 5       |
| G1.1   | 1         | 1   | 1 g     | LBK    | SS316    | 0.681       | 0.296         | 6       |
| G1.1   | 1         | 1   | 1 g     | LBK    | SS316    | 0.629       | 0.373         | 7       |
| G1.1   | 1         | 1   | 1 g     | LBK    | SS316    | 0.875       | 0.298         | 8       |
| G1.1   | 1         | 1   | 1 g     | LBK    | SS316    | 0.648       | 0.290         | 9       |
| G1.1   | 1         | 1   | 1 g     | LBK    | SS316    | 0.807       | 0.313         | 10      |
| G1.1   | 1         | 1   | 1 g     | LBK    | SS316    | 0.828       | 0.283         | 11      |
| G1.1   | 1         | 1   | 1 g     | LBK    | SS316    | 1.002       | 0.342         | 12      |
| G1.1   | 1         | 1   | 1 g     | LBK    | SS316    | 1.236       | 0.255         | 13      |
| G1.1   | 1         | 1   | 1 g     | LBK    | SS316    | 0.846       | 0.392         | 14      |
| G1.1   | 1         | 1   | 1 g     | LBK    | SS316    | 0.889       | 0.287         | 15      |
| G1.1   | 1         | 1   | 1 g     | LBK    | SS316    | 0.955       | 0.403         | 16      |
| G1.1   | 1         | 1   | 1 g     | LBK    | SS316    | 0.933       | 0.375         | 17      |
| G1.1   | 1         | 1   | 1 g     | LBK    | SS316    | 0.706       | 0.358         | 18      |
| G1.1   | 1         | 1   | 1 g     | LBK    | SS316    | 0.846       | 0.376         | 19      |
| G1.1   | 1         | 1   | 1 g     | LBK    | SS316    | 0.976       | 0.425         | 20      |
| G1.1   | 1         | 1   | 1 g     | LBK    | SS316    | 0.765       | 0.363         | 21      |
| G1.1   | 1         | 1   | 1 g     | LBK    | SS316    | 0.909       | 0.300         | 22      |
| G1.1   | 1         | 1   | 1 g     | LBK    | SS316    | 0.877       | 0.351         | 23      |
| G1.1   | 1         | 1   | 1 g     | LBK    | SS316    | 1.083       | 0.331         | 24      |
| G1.1   | 1         | 1   | 1 g     | LBK    | SS316    | 0.909       | 0.309         | 25      |
| G1.1   | 2         | 1   | 1 g     | LBK    | SS316    | 0.954       | 0.366         | 1       |
| G1.1   | 2         | 1   | 1 g     | LBK    | SS316    | 0.661       | 0.362         | 2       |
| G1.1   | 2         | 1   | 1 g     | LBK    | SS316    | 0.565       | 0.329         | 3       |
| G1.1   | 2         | 1   | 1 g     | LBK    | SS316    | 0.779       | 0.300         | 4       |
| G1.1   | 2         | 1   | 1 g     | LBK    | SS316    | 0.589       | 0.234         | 5       |
| G1.1   | 2         | 1   | 1 g     | LBK    | SS316    | 1.085       | 0.376         | 6       |
| G1.1   | 2         | 1   | 1 g     | LBK    | SS316    | 0.888       | 0.331         | 7       |
| G1.1   | 2         | 1   | 1 g     | LBK    | SS316    | 0.841       | 0.249         | 8       |
| G1.1   | 2         | 1   | 1 g     | LBK    | SS316    | 0.884       | 0.289         | 9       |
| G1.1   | 2         | 1   | 1 g     | LBK    | SS316    | 0.690       | 0.351         | 10      |
| G1.1   | 2         | 1   | 1 g     | LBK    | SS316    | 1.174       | 0.349         | 11      |
| G1.1   | 2         | 1   | 1 g     | LBK    | SS316    | 0.867       | 0.380         | 12      |
| G1.1   | 2         | 1   | 1 g     | LBK    | SS316    | 1.125       | 0.376         | 13      |
| G1.1   | 2         | 1   | 1 g     | LBK    | SS316    | 0.614       | 0.283         | 14      |
| G1.1   | 2         | 1   | 1 g     | LBK    | SS316    | 0.447       | 0.308         | 15      |
| G1.1   | 2         | 1   | 1 g     | LBK    | SS316    | 0.951       | 0.316         | 16      |
| G1.1   | 2         | 1   | 1 g     | LBK    | SS316    | 0.745       | 0.362         | 17      |
| G1.1   | 2         | 1   | 1 g     | LBK    | SS316    | 0.907       | 0.376         | 18      |
| G1.1   | 2         | 1   | 1 g     | LBK    | SS316    | 0.751       | 0.376         | 19      |
| G1.1   | 2         | 1   | 1 g     | LBK    | SS316    | 0.471       | 0.309         | 20      |
| G1.1   | 2         | 1   | 1 g     | LBK    | SS316    | 0.722       | 0.304         | 21      |
| G1.1   | 2         | 1   | 1 g     | LBK    | SS316    | 0.962       | 0.276         | 22      |

|      |   |   |     |     |       |       |       |    |
|------|---|---|-----|-----|-------|-------|-------|----|
| G1.1 | 2 | 1 | 1 g | LBK | SS316 | 0.578 | 0.268 | 23 |
| G1.1 | 2 | 1 | 1 g | LBK | SS316 | 0.860 | 0.436 | 24 |
| G1.1 | 2 | 1 | 1 g | LBK | SS316 | 0.947 | 0.309 | 25 |
| G1.1 | 3 | 1 | 1 g | LBK | SS316 | 1.066 | 0.233 | 1  |
| G1.1 | 3 | 1 | 1 g | LBK | SS316 | 0.726 | 0.309 | 2  |
| G1.1 | 3 | 1 | 1 g | LBK | SS316 | 1.079 | 0.361 | 3  |
| G1.1 | 3 | 1 | 1 g | LBK | SS316 | 0.736 | 0.316 | 4  |
| G1.1 | 3 | 1 | 1 g | LBK | SS316 | 0.801 | 0.342 | 5  |
| G1.1 | 3 | 1 | 1 g | LBK | SS316 | 1.171 | 0.283 | 6  |
| G1.1 | 3 | 1 | 1 g | LBK | SS316 | 0.802 | 0.223 | 7  |
| G1.1 | 3 | 1 | 1 g | LBK | SS316 | 0.760 | 0.313 | 8  |
| G1.1 | 3 | 1 | 1 g | LBK | SS316 | 1.341 | 0.292 | 9  |
| G1.1 | 3 | 1 | 1 g | LBK | SS316 | 1.154 | 0.347 | 10 |
| G1.1 | 3 | 1 | 1 g | LBK | SS316 | 0.969 | 0.299 | 11 |
| G1.1 | 3 | 1 | 1 g | LBK | SS316 | 0.992 | 0.350 | 12 |
| G1.1 | 3 | 1 | 1 g | LBK | SS316 | 0.678 | 0.325 | 13 |
| G1.1 | 3 | 1 | 1 g | LBK | SS316 | 0.770 | 0.295 | 14 |
| G1.1 | 3 | 1 | 1 g | LBK | SS316 | 1.187 | 0.325 | 15 |
| G1.1 | 3 | 1 | 1 g | LBK | SS316 | 1.020 | 0.351 | 16 |
| G1.1 | 3 | 1 | 1 g | LBK | SS316 | 0.682 | 0.288 | 17 |
| G1.1 | 3 | 1 | 1 g | LBK | SS316 | 1.090 | 0.321 | 18 |
| G1.1 | 3 | 1 | 1 g | LBK | SS316 | 1.022 | 0.371 | 19 |
| G1.1 | 3 | 1 | 1 g | LBK | SS316 | 0.767 | 0.342 | 20 |
| G1.1 | 3 | 1 | 1 g | LBK | SS316 | 0.887 | 0.360 | 21 |
| G1.1 | 3 | 1 | 1 g | LBK | SS316 | 1.262 | 0.282 | 22 |
| G1.1 | 3 | 1 | 1 g | LBK | SS316 | 0.647 | 0.357 | 23 |
| G1.1 | 3 | 1 | 1 g | LBK | SS316 | 0.888 | 0.471 | 24 |
| G1.1 | 3 | 1 | 1 g | LBK | SS316 | 0.681 | 0.318 | 25 |
| G1.1 | 4 | 1 | 1 g | LBK | SS316 | 0.917 | 0.334 | 1  |
| G1.1 | 4 | 1 | 1 g | LBK | SS316 | 1.048 | 0.383 | 2  |
| G1.1 | 4 | 1 | 1 g | LBK | SS316 | 1.205 | 0.383 | 3  |
| G1.1 | 4 | 1 | 1 g | LBK | SS316 | 1.049 | 0.413 | 4  |
| G1.1 | 4 | 1 | 1 g | LBK | SS316 | 1.003 | 0.383 | 5  |
| G1.1 | 4 | 1 | 1 g | LBK | SS316 | 0.897 | 0.245 | 6  |
| G1.1 | 4 | 1 | 1 g | LBK | SS316 | 0.826 | 0.35  | 7  |
| G1.1 | 4 | 1 | 1 g | LBK | SS316 | 0.823 | 0.336 | 8  |
| G1.1 | 4 | 1 | 1 g | LBK | SS316 | 0.916 | 0.402 | 9  |
| G1.1 | 4 | 1 | 1 g | LBK | SS316 | 1.051 | 0.323 | 10 |
| G1.1 | 4 | 1 | 1 g | LBK | SS316 | 0.783 | 0.288 | 11 |
| G1.1 | 4 | 1 | 1 g | LBK | SS316 | 0.983 | 0.401 | 12 |
| G1.1 | 4 | 1 | 1 g | LBK | SS316 | 0.686 | 0.444 | 13 |
| G1.1 | 4 | 1 | 1 g | LBK | SS316 | 0.792 | 0.24  | 14 |
| G1.1 | 4 | 1 | 1 g | LBK | SS316 | 0.838 | 0.322 | 15 |
| G1.1 | 4 | 1 | 1 g | LBK | SS316 | 0.596 | 0.269 | 16 |
| G1.1 | 4 | 1 | 1 g | LBK | SS316 | 0.899 | 0.392 | 17 |
| G1.1 | 4 | 1 | 1 g | LBK | SS316 | 0.891 | 0.381 | 18 |
| G1.1 | 4 | 1 | 1 g | LBK | SS316 | 1.32  | 0.362 | 19 |
| G1.1 | 4 | 1 | 1 g | LBK | SS316 | 0.883 | 0.431 | 20 |
| G1.1 | 4 | 1 | 1 g | LBK | SS316 | 0.851 | 0.368 | 21 |
| G1.1 | 4 | 1 | 1 g | LBK | SS316 | 0.682 | 0.364 | 22 |

|      |   |   |     |     |         |       |       |    |
|------|---|---|-----|-----|---------|-------|-------|----|
| G1.1 | 4 | 1 | 1 g | LBK | SS316   | 0.992 | 0.389 | 23 |
| G1.1 | 4 | 1 | 1 g | LBK | SS316   | 0.62  | 0.331 | 24 |
| G1.1 | 4 | 1 | 1 g | LBK | SS316   | 1.233 | 0.407 | 25 |
| G1.5 | 1 | 1 | 1 g | LBK | p-SS316 | 1.22  | 0.323 | 1  |
| G1.5 | 1 | 1 | 1 g | LBK | p-SS316 | 0.72  | 0.449 | 2  |
| G1.5 | 1 | 1 | 1 g | LBK | p-SS316 | 0.587 | 0.308 | 3  |
| G1.5 | 1 | 1 | 1 g | LBK | p-SS316 | 0.789 | 0.349 | 4  |
| G1.5 | 1 | 1 | 1 g | LBK | p-SS316 | 0.693 | 0.355 | 5  |
| G1.5 | 1 | 1 | 1 g | LBK | p-SS316 | 1.116 | 0.321 | 6  |
| G1.5 | 1 | 1 | 1 g | LBK | p-SS316 | 0.602 | 0.349 | 7  |
| G1.5 | 1 | 1 | 1 g | LBK | p-SS316 | 0.809 | 0.321 | 8  |
| G1.5 | 1 | 1 | 1 g | LBK | p-SS316 | 0.885 | 0.364 | 9  |
| G1.5 | 1 | 1 | 1 g | LBK | p-SS316 | 0.624 | 0.423 | 10 |
| G1.5 | 1 | 1 | 1 g | LBK | p-SS316 | 0.789 | 0.334 | 11 |
| G1.5 | 1 | 1 | 1 g | LBK | p-SS316 | 0.805 | 0.415 | 12 |
| G1.5 | 1 | 1 | 1 g | LBK | p-SS316 | 0.644 | 0.405 | 13 |
| G1.5 | 1 | 1 | 1 g | LBK | p-SS316 | 0.963 | 0.383 | 14 |
| G1.5 | 1 | 1 | 1 g | LBK | p-SS316 | 0.933 | 0.308 | 15 |
| G1.5 | 1 | 1 | 1 g | LBK | p-SS316 | 0.919 | 0.44  | 16 |
| G1.5 | 1 | 1 | 1 g | LBK | p-SS316 | 0.972 | 0.389 | 17 |
| G1.5 | 1 | 1 | 1 g | LBK | p-SS316 | 0.78  | 0.398 | 18 |
| G1.5 | 1 | 1 | 1 g | LBK | p-SS316 | 1.049 | 0.376 | 19 |
| G1.5 | 1 | 1 | 1 g | LBK | p-SS316 | 0.966 | 0.37  | 20 |
| G1.5 | 1 | 1 | 1 g | LBK | p-SS316 | 0.746 | 0.315 | 21 |
| G1.5 | 1 | 1 | 1 g | LBK | p-SS316 | 0.881 | 0.349 | 22 |
| G1.5 | 1 | 1 | 1 g | LBK | p-SS316 | 0.969 | 0.382 | 23 |
| G1.5 | 1 | 1 | 1 g | LBK | p-SS316 | 1.134 | 0.333 | 24 |
| G1.5 | 1 | 1 | 1 g | LBK | p-SS316 | 1.073 | 0.371 | 25 |
| G1.5 | 2 | 1 | 1 g | LBK | p-SS316 | 0.918 | 0.336 | 1  |
| G1.5 | 2 | 1 | 1 g | LBK | p-SS316 | 0.772 | 0.307 | 2  |
| G1.5 | 2 | 1 | 1 g | LBK | p-SS316 | 0.633 | 0.35  | 3  |
| G1.5 | 2 | 1 | 1 g | LBK | p-SS316 | 0.693 | 0.3   | 4  |
| G1.5 | 2 | 1 | 1 g | LBK | p-SS316 | 1.018 | 0.308 | 5  |
| G1.5 | 2 | 1 | 1 g | LBK | p-SS316 | 0.672 | 0.311 | 6  |
| G1.5 | 2 | 1 | 1 g | LBK | p-SS316 | 1.217 | 0.298 | 7  |
| G1.5 | 2 | 1 | 1 g | LBK | p-SS316 | 0.959 | 0.315 | 8  |
| G1.5 | 2 | 1 | 1 g | LBK | p-SS316 | 0.634 | 0.308 | 9  |
| G1.5 | 2 | 1 | 1 g | LBK | p-SS316 | 0.885 | 0.353 | 10 |
| G1.5 | 2 | 1 | 1 g | LBK | p-SS316 | 0.709 | 0.314 | 11 |
| G1.5 | 2 | 1 | 1 g | LBK | p-SS316 | 0.752 | 0.301 | 12 |
| G1.5 | 2 | 1 | 1 g | LBK | p-SS316 | 0.775 | 0.341 | 13 |
| G1.5 | 2 | 1 | 1 g | LBK | p-SS316 | 0.69  | 0.312 | 14 |
| G1.5 | 2 | 1 | 1 g | LBK | p-SS316 | 0.614 | 0.342 | 15 |
| G1.5 | 2 | 1 | 1 g | LBK | p-SS316 | 0.553 | 0.312 | 16 |
| G1.5 | 2 | 1 | 1 g | LBK | p-SS316 | 0.783 | 0.334 | 17 |
| G1.5 | 2 | 1 | 1 g | LBK | p-SS316 | 1.07  | 0.341 | 18 |
| G1.5 | 2 | 1 | 1 g | LBK | p-SS316 | 0.614 | 0.329 | 19 |
| G1.5 | 2 | 1 | 1 g | LBK | p-SS316 | 0.688 | 0.296 | 20 |
| G1.5 | 2 | 1 | 1 g | LBK | p-SS316 | 0.856 | 0.298 | 21 |
| G1.5 | 2 | 1 | 1 g | LBK | p-SS316 | 0.665 | 0.282 | 22 |

|      |   |   |     |     |         |       |       |    |
|------|---|---|-----|-----|---------|-------|-------|----|
| G1.5 | 2 | 1 | 1 g | LBK | p-SS316 | 0.956 | 0.242 | 23 |
| G1.5 | 2 | 1 | 1 g | LBK | p-SS316 | 0.898 | 0.266 | 24 |
| G1.5 | 2 | 1 | 1 g | LBK | p-SS316 | 0.69  | 0.34  | 25 |
| G1.5 | 3 | 1 | 1 g | LBK | p-SS316 | 0.786 | 0.376 | 1  |
| G1.5 | 3 | 1 | 1 g | LBK | p-SS316 | 1.179 | 0.339 | 2  |
| G1.5 | 3 | 1 | 1 g | LBK | p-SS316 | 1.01  | 0.328 | 3  |
| G1.5 | 3 | 1 | 1 g | LBK | p-SS316 | 1.185 | 0.302 | 4  |
| G1.5 | 3 | 1 | 1 g | LBK | p-SS316 | 1.29  | 0.299 | 5  |
| G1.5 | 3 | 1 | 1 g | LBK | p-SS316 | 0.65  | 0.342 | 6  |
| G1.5 | 3 | 1 | 1 g | LBK | p-SS316 | 0.571 | 0.341 | 7  |
| G1.5 | 3 | 1 | 1 g | LBK | p-SS316 | 0.721 | 0.364 | 8  |
| G1.5 | 3 | 1 | 1 g | LBK | p-SS316 | 0.438 | 0.408 | 9  |
| G1.5 | 3 | 1 | 1 g | LBK | p-SS316 | 0.962 | 0.332 | 10 |
| G1.5 | 3 | 1 | 1 g | LBK | p-SS316 | 0.74  | 0.366 | 11 |
| G1.5 | 3 | 1 | 1 g | LBK | p-SS316 | 0.698 | 0.344 | 12 |
| G1.5 | 3 | 1 | 1 g | LBK | p-SS316 | 0.7   | 0.375 | 13 |
| G1.5 | 3 | 1 | 1 g | LBK | p-SS316 | 0.696 | 0.35  | 14 |
| G1.5 | 3 | 1 | 1 g | LBK | p-SS316 | 0.601 | 0.349 | 15 |
| G1.5 | 3 | 1 | 1 g | LBK | p-SS316 | 1.153 | 0.32  | 16 |
| G1.5 | 3 | 1 | 1 g | LBK | p-SS316 | 0.624 | 0.374 | 17 |
| G1.5 | 3 | 1 | 1 g | LBK | p-SS316 | 0.929 | 0.378 | 18 |
| G1.5 | 3 | 1 | 1 g | LBK | p-SS316 | 0.909 | 0.311 | 19 |
| G1.5 | 3 | 1 | 1 g | LBK | p-SS316 | 0.761 | 0.401 | 20 |
| G1.5 | 3 | 1 | 1 g | LBK | p-SS316 | 0.775 | 0.308 | 21 |
| G1.5 | 3 | 1 | 1 g | LBK | p-SS316 | 0.705 | 0.349 | 22 |
| G1.5 | 3 | 1 | 1 g | LBK | p-SS316 | 0.931 | 0.389 | 23 |
| G1.5 | 3 | 1 | 1 g | LBK | p-SS316 | 0.766 | 0.361 | 24 |
| G1.5 | 3 | 1 | 1 g | LBK | p-SS316 | 0.983 | 0.348 | 25 |
| G1.5 | 4 | 1 | 1 g | LBK | p-SS316 | 0.751 | 0.37  | 1  |
| G1.5 | 4 | 1 | 1 g | LBK | p-SS316 | 0.754 | 0.308 | 2  |
| G1.5 | 4 | 1 | 1 g | LBK | p-SS316 | 0.705 | 0.312 | 3  |
| G1.5 | 4 | 1 | 1 g | LBK | p-SS316 | 0.668 | 0.286 | 4  |
| G1.5 | 4 | 1 | 1 g | LBK | p-SS316 | 0.62  | 0.261 | 5  |
| G1.5 | 4 | 1 | 1 g | LBK | p-SS316 | 0.858 | 0.278 | 6  |
| G1.5 | 4 | 1 | 1 g | LBK | p-SS316 | 0.629 | 0.433 | 7  |
| G1.5 | 4 | 1 | 1 g | LBK | p-SS316 | 0.7   | 0.279 | 8  |
| G1.5 | 4 | 1 | 1 g | LBK | p-SS316 | 0.595 | 0.314 | 9  |
| G1.5 | 4 | 1 | 1 g | LBK | p-SS316 | 0.631 | 0.328 | 10 |
| G1.5 | 4 | 1 | 1 g | LBK | p-SS316 | 0.755 | 0.281 | 11 |
| G1.5 | 4 | 1 | 1 g | LBK | p-SS316 | 0.733 | 0.302 | 12 |
| G1.5 | 4 | 1 | 1 g | LBK | p-SS316 | 0.643 | 0.348 | 13 |
| G1.5 | 4 | 1 | 1 g | LBK | p-SS316 | 0.715 | 0.348 | 14 |
| G1.5 | 4 | 1 | 1 g | LBK | p-SS316 | 0.644 | 0.33  | 15 |
| G1.5 | 4 | 1 | 1 g | LBK | p-SS316 | 0.629 | 0.288 | 16 |
| G1.5 | 4 | 1 | 1 g | LBK | p-SS316 | 0.682 | 0.328 | 17 |
| G1.5 | 4 | 1 | 1 g | LBK | p-SS316 | 0.592 | 0.303 | 18 |
| G1.5 | 4 | 1 | 1 g | LBK | p-SS316 | 0.659 | 0.345 | 19 |
| G1.5 | 4 | 1 | 1 g | LBK | p-SS316 | 0.629 | 0.312 | 20 |
| G1.5 | 4 | 1 | 1 g | LBK | p-SS316 | 0.734 | 0.364 | 21 |
| G1.5 | 4 | 1 | 1 g | LBK | p-SS316 | 0.613 | 0.386 | 22 |

|      |   |   |     |     |         |       |       |    |
|------|---|---|-----|-----|---------|-------|-------|----|
| G1.5 | 4 | 1 | 1 g | LBK | p-SS316 | 0.668 | 0.249 | 23 |
| G1.5 | 4 | 1 | 1 g | LBK | p-SS316 | 0.79  | 0.31  | 24 |
| G1.5 | 4 | 1 | 1 g | LBK | p-SS316 | 0.775 | 0.304 | 25 |
| G2.1 | 1 | 1 | 1 g | LBK | MIT-LIS | 0.925 | 0.354 | 1  |
| G2.1 | 1 | 1 | 1 g | LBK | MIT-LIS | 1.079 | 0.373 | 2  |
| G2.1 | 1 | 1 | 1 g | LBK | MIT-LIS | 0.881 | 0.299 | 3  |
| G2.1 | 1 | 1 | 1 g | LBK | MIT-LIS | 1.104 | 0.304 | 4  |
| G2.1 | 1 | 1 | 1 g | LBK | MIT-LIS | 0.864 | 0.262 | 5  |
| G2.1 | 1 | 1 | 1 g | LBK | MIT-LIS | 0.935 | 0.304 | 6  |
| G2.1 | 1 | 1 | 1 g | LBK | MIT-LIS | 0.691 | 0.321 | 7  |
| G2.1 | 1 | 1 | 1 g | LBK | MIT-LIS | 0.907 | 0.361 | 8  |
| G2.1 | 1 | 1 | 1 g | LBK | MIT-LIS | 1.337 | 0.314 | 9  |
| G2.1 | 1 | 1 | 1 g | LBK | MIT-LIS | 1.063 | 0.371 | 10 |
| G2.1 | 1 | 1 | 1 g | LBK | MIT-LIS | 1.419 | 0.39  | 11 |
| G2.1 | 1 | 1 | 1 g | LBK | MIT-LIS | 0.751 | 0.348 | 12 |
| G2.1 | 1 | 1 | 1 g | LBK | MIT-LIS | 0.806 | 0.396 | 13 |
| G2.1 | 1 | 1 | 1 g | LBK | MIT-LIS | 1.064 | 0.352 | 14 |
| G2.1 | 1 | 1 | 1 g | LBK | MIT-LIS | 0.775 | 0.323 | 15 |
| G2.1 | 1 | 1 | 1 g | LBK | MIT-LIS | 1.122 | 0.365 | 16 |
| G2.1 | 1 | 1 | 1 g | LBK | MIT-LIS | 1.019 | 0.34  | 17 |
| G2.1 | 1 | 1 | 1 g | LBK | MIT-LIS | 1.064 | 0.394 | 18 |
| G2.1 | 1 | 1 | 1 g | LBK | MIT-LIS | 0.829 | 0.316 | 19 |
| G2.1 | 1 | 1 | 1 g | LBK | MIT-LIS | 1.052 | 0.362 | 20 |
| G2.1 | 1 | 1 | 1 g | LBK | MIT-LIS | 0.892 | 0.318 | 21 |
| G2.1 | 1 | 1 | 1 g | LBK | MIT-LIS | 0.652 | 0.304 | 22 |
| G2.1 | 1 | 1 | 1 g | LBK | MIT-LIS | 0.733 | 0.329 | 23 |
| G2.1 | 1 | 1 | 1 g | LBK | MIT-LIS | 1.262 | 0.379 | 24 |
| G2.1 | 1 | 1 | 1 g | LBK | MIT-LIS | 0.703 | 0.337 | 25 |
| G2.1 | 2 | 1 | 1 g | LBK | MIT-LIS | 1.009 | 0.384 | 1  |
| G2.1 | 2 | 1 | 1 g | LBK | MIT-LIS | 0.828 | 0.246 | 2  |
| G2.1 | 2 | 1 | 1 g | LBK | MIT-LIS | 1.019 | 0.34  | 3  |
| G2.1 | 2 | 1 | 1 g | LBK | MIT-LIS | 1.172 | 0.392 | 4  |
| G2.1 | 2 | 1 | 1 g | LBK | MIT-LIS | 0.796 | 0.347 | 5  |
| G2.1 | 2 | 1 | 1 g | LBK | MIT-LIS | 0.89  | 0.302 | 6  |
| G2.1 | 2 | 1 | 1 g | LBK | MIT-LIS | 0.781 | 0.342 | 7  |
| G2.1 | 2 | 1 | 1 g | LBK | MIT-LIS | 0.901 | 0.322 | 8  |
| G2.1 | 2 | 1 | 1 g | LBK | MIT-LIS | 0.788 | 0.39  | 9  |
| G2.1 | 2 | 1 | 1 g | LBK | MIT-LIS | 0.758 | 0.358 | 10 |
| G2.1 | 2 | 1 | 1 g | LBK | MIT-LIS | 0.873 | 0.331 | 11 |
| G2.1 | 2 | 1 | 1 g | LBK | MIT-LIS | 0.985 | 0.324 | 12 |
| G2.1 | 2 | 1 | 1 g | LBK | MIT-LIS | 0.89  | 0.336 | 13 |
| G2.1 | 2 | 1 | 1 g | LBK | MIT-LIS | 0.769 | 0.319 | 14 |
| G2.1 | 2 | 1 | 1 g | LBK | MIT-LIS | 0.759 | 0.31  | 15 |
| G2.1 | 2 | 1 | 1 g | LBK | MIT-LIS | 0.778 | 0.318 | 16 |
| G2.1 | 2 | 1 | 1 g | LBK | MIT-LIS | 0.904 | 0.342 | 17 |
| G2.1 | 2 | 1 | 1 g | LBK | MIT-LIS | 0.894 | 0.412 | 18 |
| G2.1 | 2 | 1 | 1 g | LBK | MIT-LIS | 1.052 | 0.415 | 19 |
| G2.1 | 2 | 1 | 1 g | LBK | MIT-LIS | 0.859 | 0.31  | 20 |
| G2.1 | 2 | 1 | 1 g | LBK | MIT-LIS | 0.936 | 0.366 | 21 |
| G2.1 | 2 | 1 | 1 g | LBK | MIT-LIS | 0.823 | 0.337 | 22 |

|      |   |   |     |     |         |       |       |    |
|------|---|---|-----|-----|---------|-------|-------|----|
| G2.1 | 2 | 1 | 1 g | LBK | MIT-LIS | 0.61  | 0.383 | 23 |
| G2.1 | 2 | 1 | 1 g | LBK | MIT-LIS | 0.67  | 0.292 | 24 |
| G2.1 | 2 | 1 | 1 g | LBK | MIT-LIS | 1.02  | 0.324 | 25 |
| G2.1 | 3 | 1 | 1 g | LBK | MIT-LIS | 0.766 | 0.332 | 1  |
| G2.1 | 3 | 1 | 1 g | LBK | MIT-LIS | 1.253 | 0.333 | 2  |
| G2.1 | 3 | 1 | 1 g | LBK | MIT-LIS | 0.721 | 0.337 | 3  |
| G2.1 | 3 | 1 | 1 g | LBK | MIT-LIS | 0.759 | 0.376 | 4  |
| G2.1 | 3 | 1 | 1 g | LBK | MIT-LIS | 0.889 | 0.324 | 5  |
| G2.1 | 3 | 1 | 1 g | LBK | MIT-LIS | 0.998 | 0.308 | 6  |
| G2.1 | 3 | 1 | 1 g | LBK | MIT-LIS | 0.904 | 0.404 | 7  |
| G2.1 | 3 | 1 | 1 g | LBK | MIT-LIS | 0.727 | 0.333 | 8  |
| G2.1 | 3 | 1 | 1 g | LBK | MIT-LIS | 0.786 | 0.363 | 9  |
| G2.1 | 3 | 1 | 1 g | LBK | MIT-LIS | 0.974 | 0.356 | 10 |
| G2.1 | 3 | 1 | 1 g | LBK | MIT-LIS | 1.176 | 0.299 | 11 |
| G2.1 | 3 | 1 | 1 g | LBK | MIT-LIS | 0.788 | 0.333 | 12 |
| G2.1 | 3 | 1 | 1 g | LBK | MIT-LIS | 0.618 | 0.283 | 13 |
| G2.1 | 3 | 1 | 1 g | LBK | MIT-LIS | 0.888 | 0.316 | 14 |
| G2.1 | 3 | 1 | 1 g | LBK | MIT-LIS | 0.707 | 0.321 | 15 |
| G2.1 | 3 | 1 | 1 g | LBK | MIT-LIS | 1.073 | 0.316 | 16 |
| G2.1 | 3 | 1 | 1 g | LBK | MIT-LIS | 0.584 | 0.379 | 17 |
| G2.1 | 3 | 1 | 1 g | LBK | MIT-LIS | 1.004 | 0.271 | 18 |
| G2.1 | 3 | 1 | 1 g | LBK | MIT-LIS | 1.174 | 0.339 | 19 |
| G2.1 | 3 | 1 | 1 g | LBK | MIT-LIS | 0.914 | 0.331 | 20 |
| G2.1 | 3 | 1 | 1 g | LBK | MIT-LIS | 0.776 | 0.38  | 21 |
| G2.1 | 3 | 1 | 1 g | LBK | MIT-LIS | 0.764 | 0.319 | 22 |
| G2.1 | 3 | 1 | 1 g | LBK | MIT-LIS | 1.089 | 0.279 | 23 |
| G2.1 | 3 | 1 | 1 g | LBK | MIT-LIS | 0.682 | 0.373 | 24 |
| G2.1 | 3 | 1 | 1 g | LBK | MIT-LIS | 1.169 | 0.36  | 25 |
| G2.1 | 4 | 1 | 1 g | LBK | MIT-LIS | 0.88  | 0.392 | 1  |
| G2.1 | 4 | 1 | 1 g | LBK | MIT-LIS | 0.705 | 0.463 | 2  |
| G2.1 | 4 | 1 | 1 g | LBK | MIT-LIS | 0.833 | 0.376 | 3  |
| G2.1 | 4 | 1 | 1 g | LBK | MIT-LIS | 0.692 | 0.323 | 4  |
| G2.1 | 4 | 1 | 1 g | LBK | MIT-LIS | 0.933 | 0.41  | 5  |
| G2.1 | 4 | 1 | 1 g | LBK | MIT-LIS | 0.757 | 0.318 | 6  |
| G2.1 | 4 | 1 | 1 g | LBK | MIT-LIS | 0.693 | 0.357 | 7  |
| G2.1 | 4 | 1 | 1 g | LBK | MIT-LIS | 0.708 | 0.31  | 8  |
| G2.1 | 4 | 1 | 1 g | LBK | MIT-LIS | 0.703 | 0.395 | 9  |
| G2.1 | 4 | 1 | 1 g | LBK | MIT-LIS | 0.613 | 0.31  | 10 |
| G2.1 | 4 | 1 | 1 g | LBK | MIT-LIS | 0.642 | 0.336 | 11 |
| G2.1 | 4 | 1 | 1 g | LBK | MIT-LIS | 0.714 | 0.415 | 12 |
| G2.1 | 4 | 1 | 1 g | LBK | MIT-LIS | 0.833 | 0.351 | 13 |
| G2.1 | 4 | 1 | 1 g | LBK | MIT-LIS | 0.703 | 0.324 | 14 |
| G2.1 | 4 | 1 | 1 g | LBK | MIT-LIS | 0.783 | 0.387 | 15 |
| G2.1 | 4 | 1 | 1 g | LBK | MIT-LIS | 0.827 | 0.321 | 16 |
| G2.1 | 4 | 1 | 1 g | LBK | MIT-LIS | 0.827 | 0.438 | 17 |
| G2.1 | 4 | 1 | 1 g | LBK | MIT-LIS | 0.775 | 0.3   | 18 |
| G2.1 | 4 | 1 | 1 g | LBK | MIT-LIS | 0.871 | 0.378 | 19 |
| G2.1 | 4 | 1 | 1 g | LBK | MIT-LIS | 0.976 | 0.438 | 20 |
| G2.1 | 4 | 1 | 1 g | LBK | MIT-LIS | 0.726 | 0.504 | 21 |
| G2.1 | 4 | 1 | 1 g | LBK | MIT-LIS | 0.722 | 0.424 | 22 |

|      |   |   |     |     |         |       |       |    |
|------|---|---|-----|-----|---------|-------|-------|----|
| G2.1 | 4 | 1 | 1 g | LBK | MIT-LIS | 0.765 | 0.298 | 23 |
| G2.1 | 4 | 1 | 1 g | LBK | MIT-LIS | 0.73  | 0.279 | 24 |
| G2.1 | 4 | 1 | 1 g | LBK | MIT-LIS | 0.665 | 0.351 | 25 |
| G7.1 | 1 | 2 | 1 g | LBK | SS316   | 0.754 | 0.448 | 1  |
| G7.1 | 1 | 2 | 1 g | LBK | SS316   | 0.91  | 0.33  | 2  |
| G7.1 | 1 | 2 | 1 g | LBK | SS316   | 1.03  | 0.383 | 3  |
| G7.1 | 1 | 2 | 1 g | LBK | SS316   | 1.512 | 0.363 | 4  |
| G7.1 | 1 | 2 | 1 g | LBK | SS316   | 1.061 | 0.344 | 5  |
| G7.1 | 1 | 2 | 1 g | LBK | SS316   | 0.883 | 0.305 | 6  |
| G7.1 | 1 | 2 | 1 g | LBK | SS316   | 1.01  | 0.377 | 7  |
| G7.1 | 1 | 2 | 1 g | LBK | SS316   | 1.066 | 0.441 | 8  |
| G7.1 | 1 | 2 | 1 g | LBK | SS316   | 0.771 | 0.359 | 9  |
| G7.1 | 1 | 2 | 1 g | LBK | SS316   | 0.953 | 0.313 | 10 |
| G7.1 | 1 | 2 | 1 g | LBK | SS316   | 0.9   | 0.369 | 11 |
| G7.1 | 1 | 2 | 1 g | LBK | SS316   | 1.231 | 0.34  | 12 |
| G7.1 | 1 | 2 | 1 g | LBK | SS316   | 1.161 | 0.306 | 13 |
| G7.1 | 1 | 2 | 1 g | LBK | SS316   | 1.047 | 0.327 | 14 |
| G7.1 | 1 | 2 | 1 g | LBK | SS316   | 1.061 | 0.317 | 15 |
| G7.1 | 1 | 2 | 1 g | LBK | SS316   | 0.918 | 0.344 | 16 |
| G7.1 | 1 | 2 | 1 g | LBK | SS316   | 1.208 | 0.321 | 17 |
| G7.1 | 1 | 2 | 1 g | LBK | SS316   | 1.026 | 0.457 | 18 |
| G7.1 | 1 | 2 | 1 g | LBK | SS316   | 1.239 | 0.361 | 19 |
| G7.1 | 1 | 2 | 1 g | LBK | SS316   | 1.016 | 0.38  | 20 |
| G7.1 | 1 | 2 | 1 g | LBK | SS316   | 0.93  | 0.345 | 21 |
| G7.1 | 1 | 2 | 1 g | LBK | SS316   | 0.936 | 0.393 | 22 |
| G7.1 | 1 | 2 | 1 g | LBK | SS316   | 0.852 | 0.383 | 23 |
| G7.1 | 1 | 2 | 1 g | LBK | SS316   | 0.766 | 0.403 | 24 |
| G7.1 | 1 | 2 | 1 g | LBK | SS316   | 1.027 | 0.353 | 25 |
| G7.1 | 2 | 2 | 1 g | LBK | SS316   | 0.969 | 0.344 | 1  |
| G7.1 | 2 | 2 | 1 g | LBK | SS316   | 0.94  | 0.413 | 2  |
| G7.1 | 2 | 2 | 1 g | LBK | SS316   | 1.043 | 0.269 | 3  |
| G7.1 | 2 | 2 | 1 g | LBK | SS316   | 1.452 | 0.298 | 4  |
| G7.1 | 2 | 2 | 1 g | LBK | SS316   | 1.138 | 0.307 | 5  |
| G7.1 | 2 | 2 | 1 g | LBK | SS316   | 1.516 | 0.342 | 6  |
| G7.1 | 2 | 2 | 1 g | LBK | SS316   | 1.173 | 0.393 | 7  |
| G7.1 | 2 | 2 | 1 g | LBK | SS316   | 0.978 | 0.368 | 8  |
| G7.1 | 2 | 2 | 1 g | LBK | SS316   | 0.91  | 0.369 | 9  |
| G7.1 | 2 | 2 | 1 g | LBK | SS316   | 1.122 | 0.404 | 10 |
| G7.1 | 2 | 2 | 1 g | LBK | SS316   | 1.322 | 0.363 | 11 |
| G7.1 | 2 | 2 | 1 g | LBK | SS316   | 1.178 | 0.323 | 12 |
| G7.1 | 2 | 2 | 1 g | LBK | SS316   | 1.113 | 0.292 | 13 |
| G7.1 | 2 | 2 | 1 g | LBK | SS316   | 1.146 | 0.307 | 14 |
| G7.1 | 2 | 2 | 1 g | LBK | SS316   | 0.914 | 0.378 | 15 |
| G7.1 | 2 | 2 | 1 g | LBK | SS316   | 0.899 | 0.323 | 16 |
| G7.1 | 2 | 2 | 1 g | LBK | SS316   | 1.129 | 0.287 | 17 |
| G7.1 | 2 | 2 | 1 g | LBK | SS316   | 1.269 | 0.305 | 18 |
| G7.1 | 2 | 2 | 1 g | LBK | SS316   | 1.135 | 0.38  | 19 |
| G7.1 | 2 | 2 | 1 g | LBK | SS316   | 0.711 | 0.305 | 20 |
| G7.1 | 2 | 2 | 1 g | LBK | SS316   | 1.203 | 0.333 | 21 |
| G7.1 | 2 | 2 | 1 g | LBK | SS316   | 1.13  | 0.28  | 22 |

|      |   |   |     |     |       |       |       |    |
|------|---|---|-----|-----|-------|-------|-------|----|
| G7.1 | 2 | 2 | 1 g | LBK | SS316 | 1.26  | 0.369 | 23 |
| G7.1 | 2 | 2 | 1 g | LBK | SS316 | 1.347 | 0.294 | 24 |
| G7.1 | 2 | 2 | 1 g | LBK | SS316 | 1.737 | 0.498 | 25 |
| G7.1 | 3 | 2 | 1 g | LBK | SS316 | 1.311 | 0.353 | 1  |
| G7.1 | 3 | 2 | 1 g | LBK | SS316 | 1.075 | 0.323 | 2  |
| G7.1 | 3 | 2 | 1 g | LBK | SS316 | 1.248 | 0.34  | 3  |
| G7.1 | 3 | 2 | 1 g | LBK | SS316 | 1.182 | 0.348 | 4  |
| G7.1 | 3 | 2 | 1 g | LBK | SS316 | 0.946 | 0.358 | 5  |
| G7.1 | 3 | 2 | 1 g | LBK | SS316 | 1.022 | 0.313 | 6  |
| G7.1 | 3 | 2 | 1 g | LBK | SS316 | 0.682 | 0.344 | 7  |
| G7.1 | 3 | 2 | 1 g | LBK | SS316 | 0.821 | 0.409 | 8  |
| G7.1 | 3 | 2 | 1 g | LBK | SS316 | 1.105 | 0.306 | 9  |
| G7.1 | 3 | 2 | 1 g | LBK | SS316 | 1.164 | 0.305 | 10 |
| G7.1 | 3 | 2 | 1 g | LBK | SS316 | 1.523 | 0.338 | 11 |
| G7.1 | 3 | 2 | 1 g | LBK | SS316 | 1.099 | 0.335 | 12 |
| G7.1 | 3 | 2 | 1 g | LBK | SS316 | 1.141 | 0.432 | 13 |
| G7.1 | 3 | 2 | 1 g | LBK | SS316 | 1.042 | 0.369 | 14 |
| G7.1 | 3 | 2 | 1 g | LBK | SS316 | 1.493 | 0.466 | 15 |
| G7.1 | 3 | 2 | 1 g | LBK | SS316 | 1.081 | 0.393 | 16 |
| G7.1 | 3 | 2 | 1 g | LBK | SS316 | 1.184 | 0.342 | 17 |
| G7.1 | 3 | 2 | 1 g | LBK | SS316 | 1.119 | 0.369 | 18 |
| G7.1 | 3 | 2 | 1 g | LBK | SS316 | 1.218 | 0.381 | 19 |
| G7.1 | 3 | 2 | 1 g | LBK | SS316 | 1.685 | 0.409 | 20 |
| G7.1 | 3 | 2 | 1 g | LBK | SS316 | 1.09  | 0.445 | 21 |
| G7.1 | 3 | 2 | 1 g | LBK | SS316 | 1.113 | 0.448 | 22 |
| G7.1 | 3 | 2 | 1 g | LBK | SS316 | 1.242 | 0.282 | 23 |
| G7.1 | 3 | 2 | 1 g | LBK | SS316 | 1.082 | 0.282 | 24 |
| G7.1 | 3 | 2 | 1 g | LBK | SS316 | 1.437 | 0.285 | 25 |
| G7.1 | 4 | 2 | 1 g | LBK | SS316 | 0.979 | 0.361 | 1  |
| G7.1 | 4 | 2 | 1 g | LBK | SS316 | 1.552 | 0.386 | 2  |
| G7.1 | 4 | 2 | 1 g | LBK | SS316 | 1.203 | 0.369 | 3  |
| G7.1 | 4 | 2 | 1 g | LBK | SS316 | 1.157 | 0.323 | 4  |
| G7.1 | 4 | 2 | 1 g | LBK | SS316 | 0.848 | 0.366 | 5  |
| G7.1 | 4 | 2 | 1 g | LBK | SS316 | 1.241 | 0.306 | 6  |
| G7.1 | 4 | 2 | 1 g | LBK | SS316 | 0.865 | 0.398 | 7  |
| G7.1 | 4 | 2 | 1 g | LBK | SS316 | 0.97  | 0.384 | 8  |
| G7.1 | 4 | 2 | 1 g | LBK | SS316 | 0.869 | 0.341 | 9  |
| G7.1 | 4 | 2 | 1 g | LBK | SS316 | 0.981 | 0.394 | 10 |
| G7.1 | 4 | 2 | 1 g | LBK | SS316 | 0.932 | 0.38  | 11 |
| G7.1 | 4 | 2 | 1 g | LBK | SS316 | 0.716 | 0.333 | 12 |
| G7.1 | 4 | 2 | 1 g | LBK | SS316 | 1.322 | 0.432 | 13 |
| G7.1 | 4 | 2 | 1 g | LBK | SS316 | 1.004 | 0.323 | 14 |
| G7.1 | 4 | 2 | 1 g | LBK | SS316 | 0.953 | 0.36  | 15 |
| G7.1 | 4 | 2 | 1 g | LBK | SS316 | 1.106 | 0.298 | 16 |
| G7.1 | 4 | 2 | 1 g | LBK | SS316 | 0.851 | 0.489 | 17 |
| G7.1 | 4 | 2 | 1 g | LBK | SS316 | 1.276 | 0.409 | 18 |
| G7.1 | 4 | 2 | 1 g | LBK | SS316 | 0.915 | 0.292 | 19 |
| G7.1 | 4 | 2 | 1 g | LBK | SS316 | 1.305 | 0.381 | 20 |
| G7.1 | 4 | 2 | 1 g | LBK | SS316 | 1.12  | 0.313 | 21 |
| G7.1 | 4 | 2 | 1 g | LBK | SS316 | 1.07  | 0.348 | 22 |

|      |   |   |     |     |         |       |       |    |
|------|---|---|-----|-----|---------|-------|-------|----|
| G7.1 | 4 | 2 | 1 g | LBK | SS316   | 0.925 | 0.348 | 23 |
| G7.1 | 4 | 2 | 1 g | LBK | SS316   | 0.815 | 0.314 | 24 |
| G7.1 | 4 | 2 | 1 g | LBK | SS316   | 1.198 | 0.337 | 25 |
| G7.5 | 1 | 2 | 1 g | LBK | p-SS316 | 1.146 | 0.323 | 1  |
| G7.5 | 1 | 2 | 1 g | LBK | p-SS316 | 1.175 | 0.34  | 2  |
| G7.5 | 1 | 2 | 1 g | LBK | p-SS316 | 1.18  | 0.313 | 3  |
| G7.5 | 1 | 2 | 1 g | LBK | p-SS316 | 1.034 | 0.323 | 4  |
| G7.5 | 1 | 2 | 1 g | LBK | p-SS316 | 1.412 | 0.38  | 5  |
| G7.5 | 1 | 2 | 1 g | LBK | p-SS316 | 1.276 | 0.348 | 6  |
| G7.5 | 1 | 2 | 1 g | LBK | p-SS316 | 1.003 | 0.403 | 7  |
| G7.5 | 1 | 2 | 1 g | LBK | p-SS316 | 1.398 | 0.338 | 8  |
| G7.5 | 1 | 2 | 1 g | LBK | p-SS316 | 0.931 | 0.313 | 9  |
| G7.5 | 1 | 2 | 1 g | LBK | p-SS316 | 0.869 | 0.378 | 10 |
| G7.5 | 1 | 2 | 1 g | LBK | p-SS316 | 1.349 | 0.342 | 11 |
| G7.5 | 1 | 2 | 1 g | LBK | p-SS316 | 0.959 | 0.363 | 12 |
| G7.5 | 1 | 2 | 1 g | LBK | p-SS316 | 0.781 | 0.321 | 13 |
| G7.5 | 1 | 2 | 1 g | LBK | p-SS316 | 1.019 | 0.393 | 14 |
| G7.5 | 1 | 2 | 1 g | LBK | p-SS316 | 1.154 | 0.345 | 15 |
| G7.5 | 1 | 2 | 1 g | LBK | p-SS316 | 0.95  | 0.358 | 16 |
| G7.5 | 1 | 2 | 1 g | LBK | p-SS316 | 0.953 | 0.42  | 17 |
| G7.5 | 1 | 2 | 1 g | LBK | p-SS316 | 1.355 | 0.317 | 18 |
| G7.5 | 1 | 2 | 1 g | LBK | p-SS316 | 1.064 | 0.254 | 19 |
| G7.5 | 1 | 2 | 1 g | LBK | p-SS316 | 0.914 | 0.285 | 20 |
| G7.5 | 1 | 2 | 1 g | LBK | p-SS316 | 1.02  | 0.378 | 21 |
| G7.5 | 1 | 2 | 1 g | LBK | p-SS316 | 0.969 | 0.35  | 22 |
| G7.5 | 1 | 2 | 1 g | LBK | p-SS316 | 1.266 | 0.308 | 23 |
| G7.5 | 1 | 2 | 1 g | LBK | p-SS316 | 0.868 | 0.327 | 24 |
| G7.5 | 1 | 2 | 1 g | LBK | p-SS316 | 0.889 | 0.323 | 25 |
| G7.5 | 2 | 2 | 1 g | LBK | p-SS316 | 1.594 | 0.356 | 1  |
| G7.5 | 2 | 2 | 1 g | LBK | p-SS316 | 0.938 | 0.249 | 2  |
| G7.5 | 2 | 2 | 1 g | LBK | p-SS316 | 0.98  | 0.317 | 3  |
| G7.5 | 2 | 2 | 1 g | LBK | p-SS316 | 1.327 | 0.255 | 4  |
| G7.5 | 2 | 2 | 1 g | LBK | p-SS316 | 0.99  | 0.363 | 5  |
| G7.5 | 2 | 2 | 1 g | LBK | p-SS316 | 1.098 | 0.294 | 6  |
| G7.5 | 2 | 2 | 1 g | LBK | p-SS316 | 0.844 | 0.287 | 7  |
| G7.5 | 2 | 2 | 1 g | LBK | p-SS316 | 0.924 | 0.3   | 8  |
| G7.5 | 2 | 2 | 1 g | LBK | p-SS316 | 0.743 | 0.387 | 9  |
| G7.5 | 2 | 2 | 1 g | LBK | p-SS316 | 0.677 | 0.418 | 10 |
| G7.5 | 2 | 2 | 1 g | LBK | p-SS316 | 0.896 | 0.261 | 11 |
| G7.5 | 2 | 2 | 1 g | LBK | p-SS316 | 1.288 | 0.283 | 12 |
| G7.5 | 2 | 2 | 1 g | LBK | p-SS316 | 0.917 | 0.287 | 13 |
| G7.5 | 2 | 2 | 1 g | LBK | p-SS316 | 0.879 | 0.323 | 14 |
| G7.5 | 2 | 2 | 1 g | LBK | p-SS316 | 0.922 | 0.33  | 15 |
| G7.5 | 2 | 2 | 1 g | LBK | p-SS316 | 1.136 | 0.323 | 16 |
| G7.5 | 2 | 2 | 1 g | LBK | p-SS316 | 0.576 | 0.378 | 17 |
| G7.5 | 2 | 2 | 1 g | LBK | p-SS316 | 1.026 | 0.377 | 18 |
| G7.5 | 2 | 2 | 1 g | LBK | p-SS316 | 0.923 | 0.388 | 19 |
| G7.5 | 2 | 2 | 1 g | LBK | p-SS316 | 1     | 0.42  | 20 |
| G7.5 | 2 | 2 | 1 g | LBK | p-SS316 | 0.954 | 0.273 | 21 |
| G7.5 | 2 | 2 | 1 g | LBK | p-SS316 | 0.844 | 0.396 | 22 |

|      |   |   |     |     |         |       |       |    |
|------|---|---|-----|-----|---------|-------|-------|----|
| G7.5 | 2 | 2 | 1 g | LBK | p-SS316 | 0.852 | 0.266 | 23 |
| G7.5 | 2 | 2 | 1 g | LBK | p-SS316 | 1.093 | 0.233 | 24 |
| G7.5 | 2 | 2 | 1 g | LBK | p-SS316 | 1.108 | 0.357 | 25 |
| G7.5 | 3 | 2 | 1 g | LBK | p-SS316 | 0.946 | 0.393 | 1  |
| G7.5 | 3 | 2 | 1 g | LBK | p-SS316 | 1.078 | 0.393 | 2  |
| G7.5 | 3 | 2 | 1 g | LBK | p-SS316 | 1.082 | 0.439 | 3  |
| G7.5 | 3 | 2 | 1 g | LBK | p-SS316 | 0.94  | 0.313 | 4  |
| G7.5 | 3 | 2 | 1 g | LBK | p-SS316 | 0.763 | 0.345 | 5  |
| G7.5 | 3 | 2 | 1 g | LBK | p-SS316 | 0.978 | 0.344 | 6  |
| G7.5 | 3 | 2 | 1 g | LBK | p-SS316 | 1.026 | 0.386 | 7  |
| G7.5 | 3 | 2 | 1 g | LBK | p-SS316 | 1.243 | 0.329 | 8  |
| G7.5 | 3 | 2 | 1 g | LBK | p-SS316 | 0.854 | 0.33  | 9  |
| G7.5 | 3 | 2 | 1 g | LBK | p-SS316 | 1.074 | 0.369 | 10 |
| G7.5 | 3 | 2 | 1 g | LBK | p-SS316 | 1.05  | 0.333 | 11 |
| G7.5 | 3 | 2 | 1 g | LBK | p-SS316 | 1.015 | 0.373 | 12 |
| G7.5 | 3 | 2 | 1 g | LBK | p-SS316 | 0.954 | 0.409 | 13 |
| G7.5 | 3 | 2 | 1 g | LBK | p-SS316 | 0.805 | 0.274 | 14 |
| G7.5 | 3 | 2 | 1 g | LBK | p-SS316 | 1.164 | 0.342 | 15 |
| G7.5 | 3 | 2 | 1 g | LBK | p-SS316 | 0.901 | 0.451 | 16 |
| G7.5 | 3 | 2 | 1 g | LBK | p-SS316 | 1.091 | 0.409 | 17 |
| G7.5 | 3 | 2 | 1 g | LBK | p-SS316 | 1.024 | 0.406 | 18 |
| G7.5 | 3 | 2 | 1 g | LBK | p-SS316 | 1.182 | 0.377 | 19 |
| G7.5 | 3 | 2 | 1 g | LBK | p-SS316 | 1.15  | 0.391 | 20 |
| G7.5 | 3 | 2 | 1 g | LBK | p-SS316 | 0.95  | 0.377 | 21 |
| G7.5 | 3 | 2 | 1 g | LBK | p-SS316 | 1.056 | 0.363 | 22 |
| G7.5 | 3 | 2 | 1 g | LBK | p-SS316 | 0.929 | 0.373 | 23 |
| G7.5 | 3 | 2 | 1 g | LBK | p-SS316 | 1.089 | 0.313 | 24 |
| G7.5 | 3 | 2 | 1 g | LBK | p-SS316 | 0.809 | 0.302 | 25 |
| G7.5 | 4 | 2 | 1 g | LBK | p-SS316 | 1.064 | 0.338 | 1  |
| G7.5 | 4 | 2 | 1 g | LBK | p-SS316 | 1.142 | 0.38  | 2  |
| G7.5 | 4 | 2 | 1 g | LBK | p-SS316 | 1.025 | 0.409 | 3  |
| G7.5 | 4 | 2 | 1 g | LBK | p-SS316 | 1.74  | 0.342 | 4  |
| G7.5 | 4 | 2 | 1 g | LBK | p-SS316 | 0.904 | 0.47  | 5  |
| G7.5 | 4 | 2 | 1 g | LBK | p-SS316 | 0.854 | 0.359 | 6  |
| G7.5 | 4 | 2 | 1 g | LBK | p-SS316 | 1.383 | 0.352 | 7  |
| G7.5 | 4 | 2 | 1 g | LBK | p-SS316 | 1.144 | 0.358 | 8  |
| G7.5 | 4 | 2 | 1 g | LBK | p-SS316 | 1.092 | 0.373 | 9  |
| G7.5 | 4 | 2 | 1 g | LBK | p-SS316 | 1.353 | 0.373 | 10 |
| G7.5 | 4 | 2 | 1 g | LBK | p-SS316 | 0.901 | 0.366 | 11 |
| G7.5 | 4 | 2 | 1 g | LBK | p-SS316 | 0.969 | 0.459 | 12 |
| G7.5 | 4 | 2 | 1 g | LBK | p-SS316 | 1.14  | 0.38  | 13 |
| G7.5 | 4 | 2 | 1 g | LBK | p-SS316 | 1.142 | 0.393 | 14 |
| G7.5 | 4 | 2 | 1 g | LBK | p-SS316 | 1.347 | 0.418 | 15 |
| G7.5 | 4 | 2 | 1 g | LBK | p-SS316 | 1.22  | 0.42  | 16 |
| G7.5 | 4 | 2 | 1 g | LBK | p-SS316 | 0.956 | 0.325 | 17 |
| G7.5 | 4 | 2 | 1 g | LBK | p-SS316 | 1.348 | 0.401 | 18 |
| G7.5 | 4 | 2 | 1 g | LBK | p-SS316 | 1.372 | 0.477 | 19 |
| G7.5 | 4 | 2 | 1 g | LBK | p-SS316 | 1.054 | 0.398 | 20 |
| G7.5 | 4 | 2 | 1 g | LBK | p-SS316 | 1.311 | 0.348 | 21 |
| G7.5 | 4 | 2 | 1 g | LBK | p-SS316 | 1.144 | 0.338 | 22 |

|      |   |   |     |     |         |       |       |    |
|------|---|---|-----|-----|---------|-------|-------|----|
| G7.5 | 4 | 2 | 1 g | LBK | p-SS316 | 1.254 | 0.47  | 23 |
| G7.5 | 4 | 2 | 1 g | LBK | p-SS316 | 0.895 | 0.344 | 24 |
| G7.5 | 4 | 2 | 1 g | LBK | p-SS316 | 1.02  | 0.3   | 25 |
| G8.1 | 1 | 2 | 1 g | LBK | MIT-LIS | 0.827 | 0.294 | 1  |
| G8.1 | 1 | 2 | 1 g | LBK | MIT-LIS | 0.756 | 0.324 | 2  |
| G8.1 | 1 | 2 | 1 g | LBK | MIT-LIS | 0.957 | 0.331 | 3  |
| G8.1 | 1 | 2 | 1 g | LBK | MIT-LIS | 0.831 | 0.326 | 4  |
| G8.1 | 1 | 2 | 1 g | LBK | MIT-LIS | 0.931 | 0.372 | 5  |
| G8.1 | 1 | 2 | 1 g | LBK | MIT-LIS | 0.75  | 0.39  | 6  |
| G8.1 | 1 | 2 | 1 g | LBK | MIT-LIS | 0.849 | 0.312 | 7  |
| G8.1 | 1 | 2 | 1 g | LBK | MIT-LIS | 0.7   | 0.321 | 8  |
| G8.1 | 1 | 2 | 1 g | LBK | MIT-LIS | 0.735 | 0.311 | 9  |
| G8.1 | 1 | 2 | 1 g | LBK | MIT-LIS | 0.841 | 0.288 | 10 |
| G8.1 | 1 | 2 | 1 g | LBK | MIT-LIS | 0.7   | 0.341 | 11 |
| G8.1 | 1 | 2 | 1 g | LBK | MIT-LIS | 0.87  | 0.341 | 12 |
| G8.1 | 1 | 2 | 1 g | LBK | MIT-LIS | 1.236 | 0.343 | 13 |
| G8.1 | 1 | 2 | 1 g | LBK | MIT-LIS | 0.716 | 0.351 | 14 |
| G8.1 | 1 | 2 | 1 g | LBK | MIT-LIS | 0.868 | 0.379 | 15 |
| G8.1 | 1 | 2 | 1 g | LBK | MIT-LIS | 1.316 | 0.227 | 16 |
| G8.1 | 1 | 2 | 1 g | LBK | MIT-LIS | 0.577 | 0.364 | 17 |
| G8.1 | 1 | 2 | 1 g | LBK | MIT-LIS | 0.849 | 0.278 | 18 |
| G8.1 | 1 | 2 | 1 g | LBK | MIT-LIS | 0.963 | 0.369 | 19 |
| G8.1 | 1 | 2 | 1 g | LBK | MIT-LIS | 0.846 | 0.335 | 20 |
| G8.1 | 1 | 2 | 1 g | LBK | MIT-LIS | 1.138 | 0.33  | 21 |
| G8.1 | 1 | 2 | 1 g | LBK | MIT-LIS | 0.915 | 0.415 | 22 |
| G8.1 | 1 | 2 | 1 g | LBK | MIT-LIS | 0.904 | 0.264 | 23 |
| G8.1 | 1 | 2 | 1 g | LBK | MIT-LIS | 0.605 | 0.378 | 24 |
| G8.1 | 1 | 2 | 1 g | LBK | MIT-LIS | 1.022 | 0.375 | 25 |
| G8.1 | 2 | 2 | 1 g | LBK | MIT-LIS | 0.835 | 0.328 | 1  |
| G8.1 | 2 | 2 | 1 g | LBK | MIT-LIS | 0.936 | 0.36  | 2  |
| G8.1 | 2 | 2 | 1 g | LBK | MIT-LIS | 0.756 | 0.329 | 3  |
| G8.1 | 2 | 2 | 1 g | LBK | MIT-LIS | 1.031 | 0.375 | 4  |
| G8.1 | 2 | 2 | 1 g | LBK | MIT-LIS | 0.891 | 0.324 | 5  |
| G8.1 | 2 | 2 | 1 g | LBK | MIT-LIS | 0.873 | 0.366 | 6  |
| G8.1 | 2 | 2 | 1 g | LBK | MIT-LIS | 0.9   | 0.397 | 7  |
| G8.1 | 2 | 2 | 1 g | LBK | MIT-LIS | 1.017 | 0.363 | 8  |
| G8.1 | 2 | 2 | 1 g | LBK | MIT-LIS | 0.736 | 0.334 | 9  |
| G8.1 | 2 | 2 | 1 g | LBK | MIT-LIS | 0.848 | 0.349 | 10 |
| G8.1 | 2 | 2 | 1 g | LBK | MIT-LIS | 0.735 | 0.336 | 11 |
| G8.1 | 2 | 2 | 1 g | LBK | MIT-LIS | 0.706 | 0.389 | 12 |
| G8.1 | 2 | 2 | 1 g | LBK | MIT-LIS | 1.131 | 0.341 | 13 |
| G8.1 | 2 | 2 | 1 g | LBK | MIT-LIS | 1.006 | 0.427 | 14 |
| G8.1 | 2 | 2 | 1 g | LBK | MIT-LIS | 0.981 | 0.401 | 15 |
| G8.1 | 2 | 2 | 1 g | LBK | MIT-LIS | 0.845 | 0.283 | 16 |
| G8.1 | 2 | 2 | 1 g | LBK | MIT-LIS | 0.716 | 0.3   | 17 |
| G8.1 | 2 | 2 | 1 g | LBK | MIT-LIS | 0.89  | 0.312 | 18 |
| G8.1 | 2 | 2 | 1 g | LBK | MIT-LIS | 1.005 | 0.325 | 19 |
| G8.1 | 2 | 2 | 1 g | LBK | MIT-LIS | 0.969 | 0.308 | 20 |
| G8.1 | 2 | 2 | 1 g | LBK | MIT-LIS | 0.829 | 0.361 | 21 |
| G8.1 | 2 | 2 | 1 g | LBK | MIT-LIS | 0.786 | 0.365 | 22 |

|      |   |   |     |     |         |       |       |    |
|------|---|---|-----|-----|---------|-------|-------|----|
| G8.1 | 2 | 2 | 1 g | LBK | MIT-LIS | 0.846 | 0.36  | 23 |
| G8.1 | 2 | 2 | 1 g | LBK | MIT-LIS | 0.735 | 0.37  | 24 |
| G8.1 | 2 | 2 | 1 g | LBK | MIT-LIS | 0.789 | 0.383 | 25 |
| G8.1 | 3 | 2 | 1 g | LBK | MIT-LIS | 0.965 | 0.297 | 1  |
| G8.1 | 3 | 2 | 1 g | LBK | MIT-LIS | 1.185 | 0.284 | 2  |
| G8.1 | 3 | 2 | 1 g | LBK | MIT-LIS | 0.844 | 0.281 | 3  |
| G8.1 | 3 | 2 | 1 g | LBK | MIT-LIS | 1.021 | 0.39  | 4  |
| G8.1 | 3 | 2 | 1 g | LBK | MIT-LIS | 1.263 | 0.31  | 5  |
| G8.1 | 3 | 2 | 1 g | LBK | MIT-LIS | 0.786 | 0.312 | 6  |
| G8.1 | 3 | 2 | 1 g | LBK | MIT-LIS | 0.936 | 0.267 | 7  |
| G8.1 | 3 | 2 | 1 g | LBK | MIT-LIS | 1.032 | 0.35  | 8  |
| G8.1 | 3 | 2 | 1 g | LBK | MIT-LIS | 0.871 | 0.26  | 9  |
| G8.1 | 3 | 2 | 1 g | LBK | MIT-LIS | 1.02  | 0.319 | 10 |
| G8.1 | 3 | 2 | 1 g | LBK | MIT-LIS | 1.169 | 0.268 | 11 |
| G8.1 | 3 | 2 | 1 g | LBK | MIT-LIS | 0.56  | 0.407 | 12 |
| G8.1 | 3 | 2 | 1 g | LBK | MIT-LIS | 0.586 | 0.271 | 13 |
| G8.1 | 3 | 2 | 1 g | LBK | MIT-LIS | 0.936 | 0.282 | 14 |
| G8.1 | 3 | 2 | 1 g | LBK | MIT-LIS | 0.77  | 0.341 | 15 |
| G8.1 | 3 | 2 | 1 g | LBK | MIT-LIS | 0.813 | 0.331 | 16 |
| G8.1 | 3 | 2 | 1 g | LBK | MIT-LIS | 1.114 | 0.317 | 17 |
| G8.1 | 3 | 2 | 1 g | LBK | MIT-LIS | 1.046 | 0.371 | 18 |
| G8.1 | 3 | 2 | 1 g | LBK | MIT-LIS | 0.93  | 0.365 | 19 |
| G8.1 | 3 | 2 | 1 g | LBK | MIT-LIS | 1.233 | 0.308 | 20 |
| G8.1 | 3 | 2 | 1 g | LBK | MIT-LIS | 0.847 | 0.252 | 21 |
| G8.1 | 3 | 2 | 1 g | LBK | MIT-LIS | 0.754 | 0.323 | 22 |
| G8.1 | 3 | 2 | 1 g | LBK | MIT-LIS | 0.839 | 0.355 | 23 |
| G8.1 | 3 | 2 | 1 g | LBK | MIT-LIS | 0.779 | 0.359 | 24 |
| G8.1 | 3 | 2 | 1 g | LBK | MIT-LIS | 0.727 | 0.329 | 25 |
| G8.1 | 4 | 2 | 1 g | LBK | MIT-LIS | 0.827 | 0.346 | 1  |
| G8.1 | 4 | 2 | 1 g | LBK | MIT-LIS | 0.795 | 0.307 | 2  |
| G8.1 | 4 | 2 | 1 g | LBK | MIT-LIS | 0.781 | 0.328 | 3  |
| G8.1 | 4 | 2 | 1 g | LBK | MIT-LIS | 0.785 | 0.341 | 4  |
| G8.1 | 4 | 2 | 1 g | LBK | MIT-LIS | 0.771 | 0.278 | 5  |
| G8.1 | 4 | 2 | 1 g | LBK | MIT-LIS | 0.909 | 0.355 | 6  |
| G8.1 | 4 | 2 | 1 g | LBK | MIT-LIS | 0.822 | 0.363 | 7  |
| G8.1 | 4 | 2 | 1 g | LBK | MIT-LIS | 1.019 | 0.332 | 8  |
| G8.1 | 4 | 2 | 1 g | LBK | MIT-LIS | 0.87  | 0.379 | 9  |
| G8.1 | 4 | 2 | 1 g | LBK | MIT-LIS | 0.894 | 0.407 | 10 |
| G8.1 | 4 | 2 | 1 g | LBK | MIT-LIS | 1.106 | 0.292 | 11 |
| G8.1 | 4 | 2 | 1 g | LBK | MIT-LIS | 0.781 | 0.369 | 12 |
| G8.1 | 4 | 2 | 1 g | LBK | MIT-LIS | 0.66  | 0.34  | 13 |
| G8.1 | 4 | 2 | 1 g | LBK | MIT-LIS | 0.852 | 0.284 | 14 |
| G8.1 | 4 | 2 | 1 g | LBK | MIT-LIS | 0.869 | 0.375 | 15 |
| G8.1 | 4 | 2 | 1 g | LBK | MIT-LIS | 0.831 | 0.327 | 16 |
| G8.1 | 4 | 2 | 1 g | LBK | MIT-LIS | 0.93  | 0.407 | 17 |
| G8.1 | 4 | 2 | 1 g | LBK | MIT-LIS | 0.697 | 0.321 | 18 |
| G8.1 | 4 | 2 | 1 g | LBK | MIT-LIS | 0.71  | 0.371 | 19 |
| G8.1 | 4 | 2 | 1 g | LBK | MIT-LIS | 0.702 | 0.328 | 20 |
| G8.1 | 4 | 2 | 1 g | LBK | MIT-LIS | 0.767 | 0.411 | 21 |
| G8.1 | 4 | 2 | 1 g | LBK | MIT-LIS | 1.027 | 0.321 | 22 |

|       |   |   |     |     |         |       |       |    |
|-------|---|---|-----|-----|---------|-------|-------|----|
| G8.1  | 4 | 2 | 1 g | LBK | MIT-LIS | 0.724 | 0.321 | 23 |
| G8.1  | 4 | 2 | 1 g | LBK | MIT-LIS | 0.961 | 0.324 | 24 |
| G8.1  | 4 | 2 | 1 g | LBK | MIT-LIS | 1.026 | 0.34  | 25 |
| G13.1 | 1 | 3 | 1 g | LBK | SS316   | 1.128 | 0.323 | 1  |
| G13.1 | 1 | 3 | 1 g | LBK | SS316   | 0.977 | 0.332 | 2  |
| G13.1 | 1 | 3 | 1 g | LBK | SS316   | 0.77  | 0.287 | 3  |
| G13.1 | 1 | 3 | 1 g | LBK | SS316   | 0.858 | 0.269 | 4  |
| G13.1 | 1 | 3 | 1 g | LBK | SS316   | 1.025 | 0.332 | 5  |
| G13.1 | 1 | 3 | 1 g | LBK | SS316   | 1.083 | 0.286 | 6  |
| G13.1 | 1 | 3 | 1 g | LBK | SS316   | 0.794 | 0.295 | 7  |
| G13.1 | 1 | 3 | 1 g | LBK | SS316   | 0.751 | 0.296 | 8  |
| G13.1 | 1 | 3 | 1 g | LBK | SS316   | 0.793 | 0.257 | 9  |
| G13.1 | 1 | 3 | 1 g | LBK | SS316   | 0.836 | 0.296 | 10 |
| G13.1 | 1 | 3 | 1 g | LBK | SS316   | 1.052 | 0.254 | 11 |
| G13.1 | 1 | 3 | 1 g | LBK | SS316   | 0.974 | 0.25  | 12 |
| G13.1 | 1 | 3 | 1 g | LBK | SS316   | 1.212 | 0.284 | 13 |
| G13.1 | 1 | 3 | 1 g | LBK | SS316   | 1.023 | 0.312 | 14 |
| G13.1 | 1 | 3 | 1 g | LBK | SS316   | 1.112 | 0.31  | 15 |
| G13.1 | 1 | 3 | 1 g | LBK | SS316   | 1.044 | 0.351 | 16 |
| G13.1 | 1 | 3 | 1 g | LBK | SS316   | 1.004 | 0.335 | 17 |
| G13.1 | 1 | 3 | 1 g | LBK | SS316   | 1.104 | 0.377 | 18 |
| G13.1 | 1 | 3 | 1 g | LBK | SS316   | 1.074 | 0.298 | 19 |
| G13.1 | 1 | 3 | 1 g | LBK | SS316   | 0.872 | 0.317 | 20 |
| G13.1 | 1 | 3 | 1 g | LBK | SS316   | 1.308 | 0.345 | 21 |
| G13.1 | 1 | 3 | 1 g | LBK | SS316   | 0.987 | 0.306 | 22 |
| G13.1 | 1 | 3 | 1 g | LBK | SS316   | 1.047 | 0.308 | 23 |
| G13.1 | 1 | 3 | 1 g | LBK | SS316   | 0.984 | 0.298 | 24 |
| G13.1 | 1 | 3 | 1 g | LBK | SS316   | 1.124 | 0.305 | 25 |
| G13.1 | 2 | 3 | 1 g | LBK | SS316   | 1.077 | 0.361 | 1  |
| G13.1 | 2 | 3 | 1 g | LBK | SS316   | 0.938 | 0.326 | 2  |
| G13.1 | 2 | 3 | 1 g | LBK | SS316   | 1.225 | 0.425 | 3  |
| G13.1 | 2 | 3 | 1 g | LBK | SS316   | 0.971 | 0.286 | 4  |
| G13.1 | 2 | 3 | 1 g | LBK | SS316   | 0.898 | 0.281 | 5  |
| G13.1 | 2 | 3 | 1 g | LBK | SS316   | 0.988 | 0.318 | 6  |
| G13.1 | 2 | 3 | 1 g | LBK | SS316   | 1.022 | 0.296 | 7  |
| G13.1 | 2 | 3 | 1 g | LBK | SS316   | 1.131 | 0.28  | 8  |
| G13.1 | 2 | 3 | 1 g | LBK | SS316   | 1.028 | 0.342 | 9  |
| G13.1 | 2 | 3 | 1 g | LBK | SS316   | 1.094 | 0.338 | 10 |
| G13.1 | 2 | 3 | 1 g | LBK | SS316   | 0.936 | 0.323 | 11 |
| G13.1 | 2 | 3 | 1 g | LBK | SS316   | 0.996 | 0.358 | 12 |
| G13.1 | 2 | 3 | 1 g | LBK | SS316   | 1.172 | 0.332 | 13 |
| G13.1 | 2 | 3 | 1 g | LBK | SS316   | 1.062 | 0.344 | 14 |
| G13.1 | 2 | 3 | 1 g | LBK | SS316   | 1.328 | 0.35  | 15 |
| G13.1 | 2 | 3 | 1 g | LBK | SS316   | 1.032 | 0.361 | 16 |
| G13.1 | 2 | 3 | 1 g | LBK | SS316   | 1.071 | 0.344 | 17 |
| G13.1 | 2 | 3 | 1 g | LBK | SS316   | 1.336 | 0.289 | 18 |
| G13.1 | 2 | 3 | 1 g | LBK | SS316   | 1.079 | 0.322 | 19 |
| G13.1 | 2 | 3 | 1 g | LBK | SS316   | 1.174 | 0.321 | 20 |
| G13.1 | 2 | 3 | 1 g | LBK | SS316   | 1.073 | 0.29  | 21 |
| G13.1 | 2 | 3 | 1 g | LBK | SS316   | 1.082 | 0.331 | 22 |

|       |   |   |     |     |       |       |       |    |
|-------|---|---|-----|-----|-------|-------|-------|----|
| G13.1 | 2 | 3 | 1 g | LBK | SS316 | 1.186 | 0.29  | 23 |
| G13.1 | 2 | 3 | 1 g | LBK | SS316 | 1.228 | 0.373 | 24 |
| G13.1 | 2 | 3 | 1 g | LBK | SS316 | 1.098 | 0.267 | 25 |
| G13.1 | 3 | 3 | 1 g | LBK | SS316 | 1.067 | 0.35  | 1  |
| G13.1 | 3 | 3 | 1 g | LBK | SS316 | 1.145 | 0.328 | 2  |
| G13.1 | 3 | 3 | 1 g | LBK | SS316 | 1.498 | 0.31  | 3  |
| G13.1 | 3 | 3 | 1 g | LBK | SS316 | 1.494 | 0.323 | 4  |
| G13.1 | 3 | 3 | 1 g | LBK | SS316 | 1.762 | 0.219 | 5  |
| G13.1 | 3 | 3 | 1 g | LBK | SS316 | 1.066 | 0.314 | 6  |
| G13.1 | 3 | 3 | 1 g | LBK | SS316 | 1.357 | 0.296 | 7  |
| G13.1 | 3 | 3 | 1 g | LBK | SS316 | 0.947 | 0.32  | 8  |
| G13.1 | 3 | 3 | 1 g | LBK | SS316 | 1.053 | 0.35  | 9  |
| G13.1 | 3 | 3 | 1 g | LBK | SS316 | 1.234 | 0.322 | 10 |
| G13.1 | 3 | 3 | 1 g | LBK | SS316 | 1.169 | 0.379 | 11 |
| G13.1 | 3 | 3 | 1 g | LBK | SS316 | 1.662 | 0.303 | 12 |
| G13.1 | 3 | 3 | 1 g | LBK | SS316 | 1.11  | 0.327 | 13 |
| G13.1 | 3 | 3 | 1 g | LBK | SS316 | 0.899 | 0.248 | 14 |
| G13.1 | 3 | 3 | 1 g | LBK | SS316 | 1.216 | 0.291 | 15 |
| G13.1 | 3 | 3 | 1 g | LBK | SS316 | 1.008 | 0.239 | 16 |
| G13.1 | 3 | 3 | 1 g | LBK | SS316 | 0.809 | 0.284 | 17 |
| G13.1 | 3 | 3 | 1 g | LBK | SS316 | 0.842 | 0.266 | 18 |
| G13.1 | 3 | 3 | 1 g | LBK | SS316 | 0.673 | 0.35  | 19 |
| G13.1 | 3 | 3 | 1 g | LBK | SS316 | 1.553 | 0.283 | 20 |
| G13.1 | 3 | 3 | 1 g | LBK | SS316 | 1.081 | 0.347 | 21 |
| G13.1 | 3 | 3 | 1 g | LBK | SS316 | 1.502 | 0.284 | 22 |
| G13.1 | 3 | 3 | 1 g | LBK | SS316 | 1.208 | 0.399 | 23 |
| G13.1 | 3 | 3 | 1 g | LBK | SS316 | 0.949 | 0.336 | 24 |
| G13.1 | 3 | 3 | 1 g | LBK | SS316 | 1.406 | 0.403 | 25 |
| G13.1 | 4 | 3 | 1 g | LBK | SS316 | 1.06  | 0.355 | 1  |
| G13.1 | 4 | 3 | 1 g | LBK | SS316 | 1.08  | 0.315 | 2  |
| G13.1 | 4 | 3 | 1 g | LBK | SS316 | 1.247 | 0.363 | 3  |
| G13.1 | 4 | 3 | 1 g | LBK | SS316 | 1.141 | 0.261 | 4  |
| G13.1 | 4 | 3 | 1 g | LBK | SS316 | 1.152 | 0.316 | 5  |
| G13.1 | 4 | 3 | 1 g | LBK | SS316 | 1.146 | 0.379 | 6  |
| G13.1 | 4 | 3 | 1 g | LBK | SS316 | 1.147 | 0.248 | 7  |
| G13.1 | 4 | 3 | 1 g | LBK | SS316 | 1.142 | 0.296 | 8  |
| G13.1 | 4 | 3 | 1 g | LBK | SS316 | 1.114 | 0.278 | 9  |
| G13.1 | 4 | 3 | 1 g | LBK | SS316 | 1.263 | 0.317 | 10 |
| G13.1 | 4 | 3 | 1 g | LBK | SS316 | 1.25  | 0.325 | 11 |
| G13.1 | 4 | 3 | 1 g | LBK | SS316 | 1.144 | 0.358 | 12 |
| G13.1 | 4 | 3 | 1 g | LBK | SS316 | 1.168 | 0.301 | 13 |
| G13.1 | 4 | 3 | 1 g | LBK | SS316 | 1.032 | 0.323 | 14 |
| G13.1 | 4 | 3 | 1 g | LBK | SS316 | 1.154 | 0.309 | 15 |
| G13.1 | 4 | 3 | 1 g | LBK | SS316 | 1.185 | 0.363 | 16 |
| G13.1 | 4 | 3 | 1 g | LBK | SS316 | 0.956 | 0.3   | 17 |
| G13.1 | 4 | 3 | 1 g | LBK | SS316 | 1.566 | 0.264 | 18 |
| G13.1 | 4 | 3 | 1 g | LBK | SS316 | 0.853 | 0.323 | 19 |
| G13.1 | 4 | 3 | 1 g | LBK | SS316 | 1.451 | 0.314 | 20 |
| G13.1 | 4 | 3 | 1 g | LBK | SS316 | 0.935 | 0.352 | 21 |
| G13.1 | 4 | 3 | 1 g | LBK | SS316 | 0.905 | 0.308 | 22 |

|       |   |   |     |     |         |       |       |    |
|-------|---|---|-----|-----|---------|-------|-------|----|
| G13.1 | 4 | 3 | 1 g | LBK | SS316   | 1.261 | 0.312 | 23 |
| G13.1 | 4 | 3 | 1 g | LBK | SS316   | 1.025 | 0.323 | 24 |
| G13.1 | 4 | 3 | 1 g | LBK | SS316   | 1.268 | 0.328 | 25 |
| G13.5 | 1 | 3 | 1 g | LBK | p-SS316 | 1.317 | 0.325 | 1  |
| G13.5 | 1 | 3 | 1 g | LBK | p-SS316 | 1.562 | 0.277 | 2  |
| G13.5 | 1 | 3 | 1 g | LBK | p-SS316 | 1.533 | 0.31  | 3  |
| G13.5 | 1 | 3 | 1 g | LBK | p-SS316 | 0.816 | 0.274 | 4  |
| G13.5 | 1 | 3 | 1 g | LBK | p-SS316 | 0.854 | 0.27  | 5  |
| G13.5 | 1 | 3 | 1 g | LBK | p-SS316 | 0.895 | 0.284 | 6  |
| G13.5 | 1 | 3 | 1 g | LBK | p-SS316 | 1.118 | 0.285 | 7  |
| G13.5 | 1 | 3 | 1 g | LBK | p-SS316 | 1.066 | 0.362 | 8  |
| G13.5 | 1 | 3 | 1 g | LBK | p-SS316 | 1.584 | 0.254 | 9  |
| G13.5 | 1 | 3 | 1 g | LBK | p-SS316 | 1.16  | 0.336 | 10 |
| G13.5 | 1 | 3 | 1 g | LBK | p-SS316 | 0.987 | 0.269 | 11 |
| G13.5 | 1 | 3 | 1 g | LBK | p-SS316 | 1.274 | 0.269 | 12 |
| G13.5 | 1 | 3 | 1 g | LBK | p-SS316 | 1.326 | 0.349 | 13 |
| G13.5 | 1 | 3 | 1 g | LBK | p-SS316 | 1.346 | 0.235 | 14 |
| G13.5 | 1 | 3 | 1 g | LBK | p-SS316 | 0.799 | 0.287 | 15 |
| G13.5 | 1 | 3 | 1 g | LBK | p-SS316 | 0.921 | 0.288 | 16 |
| G13.5 | 1 | 3 | 1 g | LBK | p-SS316 | 1.319 | 0.27  | 17 |
| G13.5 | 1 | 3 | 1 g | LBK | p-SS316 | 0.947 | 0.296 | 18 |
| G13.5 | 1 | 3 | 1 g | LBK | p-SS316 | 1.066 | 0.349 | 19 |
| G13.5 | 1 | 3 | 1 g | LBK | p-SS316 | 1.381 | 0.346 | 20 |
| G13.5 | 1 | 3 | 1 g | LBK | p-SS316 | 0.98  | 0.314 | 21 |
| G13.5 | 1 | 3 | 1 g | LBK | p-SS316 | 0.902 | 0.269 | 22 |
| G13.5 | 1 | 3 | 1 g | LBK | p-SS316 | 1.492 | 0.277 | 23 |
| G13.5 | 1 | 3 | 1 g | LBK | p-SS316 | 1.381 | 0.329 | 24 |
| G13.5 | 1 | 3 | 1 g | LBK | p-SS316 | 0.97  | 0.304 | 25 |
| G13.5 | 2 | 3 | 1 g | LBK | p-SS316 | 1.522 | 0.371 | 1  |
| G13.5 | 2 | 3 | 1 g | LBK | p-SS316 | 1.458 | 0.269 | 2  |
| G13.5 | 2 | 3 | 1 g | LBK | p-SS316 | 1.257 | 0.295 | 3  |
| G13.5 | 2 | 3 | 1 g | LBK | p-SS316 | 1.082 | 0.307 | 4  |
| G13.5 | 2 | 3 | 1 g | LBK | p-SS316 | 0.933 | 0.295 | 5  |
| G13.5 | 2 | 3 | 1 g | LBK | p-SS316 | 1.701 | 0.269 | 6  |
| G13.5 | 2 | 3 | 1 g | LBK | p-SS316 | 1.353 | 0.325 | 7  |
| G13.5 | 2 | 3 | 1 g | LBK | p-SS316 | 1.503 | 0.267 | 8  |
| G13.5 | 2 | 3 | 1 g | LBK | p-SS316 | 1.376 | 0.247 | 9  |
| G13.5 | 2 | 3 | 1 g | LBK | p-SS316 | 1.26  | 0.361 | 10 |
| G13.5 | 2 | 3 | 1 g | LBK | p-SS316 | 1.099 | 0.349 | 11 |
| G13.5 | 2 | 3 | 1 g | LBK | p-SS316 | 1.697 | 0.292 | 12 |
| G13.5 | 2 | 3 | 1 g | LBK | p-SS316 | 1.351 | 0.318 | 13 |
| G13.5 | 2 | 3 | 1 g | LBK | p-SS316 | 1.138 | 0.258 | 14 |
| G13.5 | 2 | 3 | 1 g | LBK | p-SS316 | 1.457 | 0.298 | 15 |
| G13.5 | 2 | 3 | 1 g | LBK | p-SS316 | 0.643 | 0.289 | 16 |
| G13.5 | 2 | 3 | 1 g | LBK | p-SS316 | 1.517 | 0.258 | 17 |
| G13.5 | 2 | 3 | 1 g | LBK | p-SS316 | 1.282 | 0.28  | 18 |
| G13.5 | 2 | 3 | 1 g | LBK | p-SS316 | 1.147 | 0.244 | 19 |
| G13.5 | 2 | 3 | 1 g | LBK | p-SS316 | 1.101 | 0.321 | 20 |
| G13.5 | 2 | 3 | 1 g | LBK | p-SS316 | 1.632 | 0.257 | 21 |
| G13.5 | 2 | 3 | 1 g | LBK | p-SS316 | 1.405 | 0.258 | 22 |

|       |   |   |     |     |         |       |       |    |
|-------|---|---|-----|-----|---------|-------|-------|----|
| G13.5 | 2 | 3 | 1 g | LBK | p-SS316 | 1.182 | 0.323 | 23 |
| G13.5 | 2 | 3 | 1 g | LBK | p-SS316 | 0.9   | 0.28  | 24 |
| G13.5 | 2 | 3 | 1 g | LBK | p-SS316 | 1.703 | 0.252 | 25 |
| G13.5 | 3 | 3 | 1 g | LBK | p-SS316 | 0.913 | 0.309 | 1  |
| G13.5 | 3 | 3 | 1 g | LBK | p-SS316 | 1.388 | 0.341 | 2  |
| G13.5 | 3 | 3 | 1 g | LBK | p-SS316 | 1.166 | 0.323 | 3  |
| G13.5 | 3 | 3 | 1 g | LBK | p-SS316 | 1.209 | 0.251 | 4  |
| G13.5 | 3 | 3 | 1 g | LBK | p-SS316 | 0.928 | 0.38  | 5  |
| G13.5 | 3 | 3 | 1 g | LBK | p-SS316 | 1.242 | 0.345 | 6  |
| G13.5 | 3 | 3 | 1 g | LBK | p-SS316 | 0.968 | 0.344 | 7  |
| G13.5 | 3 | 3 | 1 g | LBK | p-SS316 | 1.22  | 0.366 | 8  |
| G13.5 | 3 | 3 | 1 g | LBK | p-SS316 | 1.19  | 0.325 | 9  |
| G13.5 | 3 | 3 | 1 g | LBK | p-SS316 | 1.419 | 0.337 | 10 |
| G13.5 | 3 | 3 | 1 g | LBK | p-SS316 | 0.986 | 0.337 | 11 |
| G13.5 | 3 | 3 | 1 g | LBK | p-SS316 | 1.175 | 0.346 | 12 |
| G13.5 | 3 | 3 | 1 g | LBK | p-SS316 | 1.483 | 0.321 | 13 |
| G13.5 | 3 | 3 | 1 g | LBK | p-SS316 | 1.028 | 0.362 | 14 |
| G13.5 | 3 | 3 | 1 g | LBK | p-SS316 | 1.202 | 0.361 | 15 |
| G13.5 | 3 | 3 | 1 g | LBK | p-SS316 | 1.267 | 0.397 | 16 |
| G13.5 | 3 | 3 | 1 g | LBK | p-SS316 | 1.022 | 0.39  | 17 |
| G13.5 | 3 | 3 | 1 g | LBK | p-SS316 | 0.932 | 0.321 | 18 |
| G13.5 | 3 | 3 | 1 g | LBK | p-SS316 | 0.982 | 0.383 | 19 |
| G13.5 | 3 | 3 | 1 g | LBK | p-SS316 | 1.022 | 0.306 | 20 |
| G13.5 | 3 | 3 | 1 g | LBK | p-SS316 | 0.917 | 0.325 | 21 |
| G13.5 | 3 | 3 | 1 g | LBK | p-SS316 | 0.894 | 0.325 | 22 |
| G13.5 | 3 | 3 | 1 g | LBK | p-SS316 | 1.092 | 0.353 | 23 |
| G13.5 | 3 | 3 | 1 g | LBK | p-SS316 | 1.233 | 0.323 | 24 |
| G13.5 | 3 | 3 | 1 g | LBK | p-SS316 | 1.024 | 0.334 | 25 |
| G13.5 | 4 | 3 | 1 g | LBK | p-SS316 | 0.975 | 0.296 | 1  |
| G13.5 | 4 | 3 | 1 g | LBK | p-SS316 | 1.113 | 0.277 | 2  |
| G13.5 | 4 | 3 | 1 g | LBK | p-SS316 | 1.067 | 0.258 | 3  |
| G13.5 | 4 | 3 | 1 g | LBK | p-SS316 | 1.152 | 0.344 | 4  |
| G13.5 | 4 | 3 | 1 g | LBK | p-SS316 | 1.416 | 0.366 | 5  |
| G13.5 | 4 | 3 | 1 g | LBK | p-SS316 | 1.467 | 0.325 | 6  |
| G13.5 | 4 | 3 | 1 g | LBK | p-SS316 | 1.29  | 0.313 | 7  |
| G13.5 | 4 | 3 | 1 g | LBK | p-SS316 | 1.015 | 0.258 | 8  |
| G13.5 | 4 | 3 | 1 g | LBK | p-SS316 | 0.928 | 0.3   | 9  |
| G13.5 | 4 | 3 | 1 g | LBK | p-SS316 | 1.382 | 0.274 | 10 |
| G13.5 | 4 | 3 | 1 g | LBK | p-SS316 | 1.652 | 0.353 | 11 |
| G13.5 | 4 | 3 | 1 g | LBK | p-SS316 | 0.699 | 0.233 | 12 |
| G13.5 | 4 | 3 | 1 g | LBK | p-SS316 | 1.451 | 0.274 | 13 |
| G13.5 | 4 | 3 | 1 g | LBK | p-SS316 | 0.99  | 0.289 | 14 |
| G13.5 | 4 | 3 | 1 g | LBK | p-SS316 | 1.066 | 0.317 | 15 |
| G13.5 | 4 | 3 | 1 g | LBK | p-SS316 | 0.681 | 0.329 | 16 |
| G13.5 | 4 | 3 | 1 g | LBK | p-SS316 | 1.089 | 0.258 | 17 |
| G13.5 | 4 | 3 | 1 g | LBK | p-SS316 | 1.288 | 0.274 | 18 |
| G13.5 | 4 | 3 | 1 g | LBK | p-SS316 | 1.579 | 0.321 | 19 |
| G13.5 | 4 | 3 | 1 g | LBK | p-SS316 | 1.153 | 0.304 | 20 |
| G13.5 | 4 | 3 | 1 g | LBK | p-SS316 | 1.165 | 0.296 | 21 |
| G13.5 | 4 | 3 | 1 g | LBK | p-SS316 | 1.058 | 0.307 | 22 |

|       |   |   |     |     |         |       |       |    |
|-------|---|---|-----|-----|---------|-------|-------|----|
| G13.5 | 4 | 3 | 1 g | LBK | p-SS316 | 1.278 | 0.312 | 23 |
| G13.5 | 4 | 3 | 1 g | LBK | p-SS316 | 1.235 | 0.352 | 24 |
| G13.5 | 4 | 3 | 1 g | LBK | p-SS316 | 1.216 | 0.319 | 25 |
| G14.1 | 1 | 3 | 1 g | LBK | MIT-LIS | 1.49  | 0.303 | 1  |
| G14.1 | 1 | 3 | 1 g | LBK | MIT-LIS | 1.318 | 0.284 | 2  |
| G14.1 | 1 | 3 | 1 g | LBK | MIT-LIS | 1.157 | 0.352 | 3  |
| G14.1 | 1 | 3 | 1 g | LBK | MIT-LIS | 1.017 | 0.224 | 4  |
| G14.1 | 1 | 3 | 1 g | LBK | MIT-LIS | 0.895 | 0.285 | 5  |
| G14.1 | 1 | 3 | 1 g | LBK | MIT-LIS | 1.358 | 0.289 | 6  |
| G14.1 | 1 | 3 | 1 g | LBK | MIT-LIS | 0.831 | 0.302 | 7  |
| G14.1 | 1 | 3 | 1 g | LBK | MIT-LIS | 0.727 | 0.284 | 8  |
| G14.1 | 1 | 3 | 1 g | LBK | MIT-LIS | 0.685 | 0.319 | 9  |
| G14.1 | 1 | 3 | 1 g | LBK | MIT-LIS | 1.177 | 0.283 | 10 |
| G14.1 | 1 | 3 | 1 g | LBK | MIT-LIS | 1.46  | 0.284 | 11 |
| G14.1 | 1 | 3 | 1 g | LBK | MIT-LIS | 1.102 | 0.309 | 12 |
| G14.1 | 1 | 3 | 1 g | LBK | MIT-LIS | 0.971 | 0.276 | 13 |
| G14.1 | 1 | 3 | 1 g | LBK | MIT-LIS | 1.229 | 0.239 | 14 |
| G14.1 | 1 | 3 | 1 g | LBK | MIT-LIS | 0.903 | 0.284 | 15 |
| G14.1 | 1 | 3 | 1 g | LBK | MIT-LIS | 0.857 | 0.288 | 16 |
| G14.1 | 1 | 3 | 1 g | LBK | MIT-LIS | 1.067 | 0.317 | 17 |
| G14.1 | 1 | 3 | 1 g | LBK | MIT-LIS | 0.964 | 0.331 | 18 |
| G14.1 | 1 | 3 | 1 g | LBK | MIT-LIS | 0.941 | 0.257 | 19 |
| G14.1 | 1 | 3 | 1 g | LBK | MIT-LIS | 0.673 | 0.287 | 20 |
| G14.1 | 1 | 3 | 1 g | LBK | MIT-LIS | 1.326 | 0.302 | 21 |
| G14.1 | 1 | 3 | 1 g | LBK | MIT-LIS | 0.92  | 0.327 | 22 |
| G14.1 | 1 | 3 | 1 g | LBK | MIT-LIS | 0.887 | 0.336 | 23 |
| G14.1 | 1 | 3 | 1 g | LBK | MIT-LIS | 0.704 | 0.288 | 24 |
| G14.1 | 1 | 3 | 1 g | LBK | MIT-LIS | 0.711 | 0.306 | 25 |
| G14.1 | 2 | 3 | 1 g | LBK | MIT-LIS | 0.795 | 0.323 | 1  |
| G14.1 | 2 | 3 | 1 g | LBK | MIT-LIS | 0.98  | 0.306 | 2  |
| G14.1 | 2 | 3 | 1 g | LBK | MIT-LIS | 1.145 | 0.313 | 3  |
| G14.1 | 2 | 3 | 1 g | LBK | MIT-LIS | 0.662 | 0.312 | 4  |
| G14.1 | 2 | 3 | 1 g | LBK | MIT-LIS | 0.789 | 0.314 | 5  |
| G14.1 | 2 | 3 | 1 g | LBK | MIT-LIS | 0.856 | 0.313 | 6  |
| G14.1 | 2 | 3 | 1 g | LBK | MIT-LIS | 0.914 | 0.295 | 7  |
| G14.1 | 2 | 3 | 1 g | LBK | MIT-LIS | 0.805 | 0.301 | 8  |
| G14.1 | 2 | 3 | 1 g | LBK | MIT-LIS | 0.688 | 0.309 | 9  |
| G14.1 | 2 | 3 | 1 g | LBK | MIT-LIS | 0.83  | 0.25  | 10 |
| G14.1 | 2 | 3 | 1 g | LBK | MIT-LIS | 0.793 | 0.323 | 11 |
| G14.1 | 2 | 3 | 1 g | LBK | MIT-LIS | 1.432 | 0.333 | 12 |
| G14.1 | 2 | 3 | 1 g | LBK | MIT-LIS | 1.016 | 0.376 | 13 |
| G14.1 | 2 | 3 | 1 g | LBK | MIT-LIS | 1.095 | 0.267 | 14 |
| G14.1 | 2 | 3 | 1 g | LBK | MIT-LIS | 1.079 | 0.333 | 15 |
| G14.1 | 2 | 3 | 1 g | LBK | MIT-LIS | 1.067 | 0.258 | 16 |
| G14.1 | 2 | 3 | 1 g | LBK | MIT-LIS | 1.125 | 0.313 | 17 |
| G14.1 | 2 | 3 | 1 g | LBK | MIT-LIS | 0.759 | 0.283 | 18 |
| G14.1 | 2 | 3 | 1 g | LBK | MIT-LIS | 1.411 | 0.313 | 19 |
| G14.1 | 2 | 3 | 1 g | LBK | MIT-LIS | 0.997 | 0.353 | 20 |
| G14.1 | 2 | 3 | 1 g | LBK | MIT-LIS | 0.894 | 0.34  | 21 |
| G14.1 | 2 | 3 | 1 g | LBK | MIT-LIS | 1.004 | 0.242 | 22 |

|       |   |   |     |     |         |       |       |    |
|-------|---|---|-----|-----|---------|-------|-------|----|
| G14.1 | 2 | 3 | 1 g | LBK | MIT-LIS | 1.076 | 0.298 | 23 |
| G14.1 | 2 | 3 | 1 g | LBK | MIT-LIS | 0.956 | 0.309 | 24 |
| G14.1 | 2 | 3 | 1 g | LBK | MIT-LIS | 0.97  | 0.296 | 25 |
| G14.1 | 3 | 3 | 1 g | LBK | MIT-LIS | 0.887 | 0.366 | 1  |
| G14.1 | 3 | 3 | 1 g | LBK | MIT-LIS | 1.611 | 0.289 | 2  |
| G14.1 | 3 | 3 | 1 g | LBK | MIT-LIS | 0.826 | 0.396 | 3  |
| G14.1 | 3 | 3 | 1 g | LBK | MIT-LIS | 0.93  | 0.326 | 4  |
| G14.1 | 3 | 3 | 1 g | LBK | MIT-LIS | 1.166 | 0.341 | 5  |
| G14.1 | 3 | 3 | 1 g | LBK | MIT-LIS | 0.713 | 0.305 | 6  |
| G14.1 | 3 | 3 | 1 g | LBK | MIT-LIS | 1.31  | 0.336 | 7  |
| G14.1 | 3 | 3 | 1 g | LBK | MIT-LIS | 0.798 | 0.281 | 8  |
| G14.1 | 3 | 3 | 1 g | LBK | MIT-LIS | 1.306 | 0.321 | 9  |
| G14.1 | 3 | 3 | 1 g | LBK | MIT-LIS | 0.908 | 0.328 | 10 |
| G14.1 | 3 | 3 | 1 g | LBK | MIT-LIS | 1.146 | 0.352 | 11 |
| G14.1 | 3 | 3 | 1 g | LBK | MIT-LIS | 0.772 | 0.305 | 12 |
| G14.1 | 3 | 3 | 1 g | LBK | MIT-LIS | 1.308 | 0.278 | 13 |
| G14.1 | 3 | 3 | 1 g | LBK | MIT-LIS | 1.67  | 0.274 | 14 |
| G14.1 | 3 | 3 | 1 g | LBK | MIT-LIS | 1.036 | 0.296 | 15 |
| G14.1 | 3 | 3 | 1 g | LBK | MIT-LIS | 1.51  | 0.342 | 16 |
| G14.1 | 3 | 3 | 1 g | LBK | MIT-LIS | 1.16  | 0.33  | 17 |
| G14.1 | 3 | 3 | 1 g | LBK | MIT-LIS | 1.257 | 0.369 | 18 |
| G14.1 | 3 | 3 | 1 g | LBK | MIT-LIS | 1.026 | 0.365 | 19 |
| G14.1 | 3 | 3 | 1 g | LBK | MIT-LIS | 1.405 | 0.306 | 20 |
| G14.1 | 3 | 3 | 1 g | LBK | MIT-LIS | 1.119 | 0.291 | 21 |
| G14.1 | 3 | 3 | 1 g | LBK | MIT-LIS | 0.887 | 0.374 | 22 |
| G14.1 | 3 | 3 | 1 g | LBK | MIT-LIS | 1.385 | 0.363 | 23 |
| G14.1 | 3 | 3 | 1 g | LBK | MIT-LIS | 0.882 | 0.344 | 24 |
| G14.1 | 3 | 3 | 1 g | LBK | MIT-LIS | 0.866 | 0.377 | 25 |
| G14.1 | 4 | 3 | 1 g | LBK | MIT-LIS | 0.787 | 0.265 | 1  |
| G14.1 | 4 | 3 | 1 g | LBK | MIT-LIS | 0.792 | 0.332 | 2  |
| G14.1 | 4 | 3 | 1 g | LBK | MIT-LIS | 0.986 | 0.29  | 3  |
| G14.1 | 4 | 3 | 1 g | LBK | MIT-LIS | 1.377 | 0.28  | 4  |
| G14.1 | 4 | 3 | 1 g | LBK | MIT-LIS | 0.579 | 0.315 | 5  |
| G14.1 | 4 | 3 | 1 g | LBK | MIT-LIS | 1.398 | 0.319 | 6  |
| G14.1 | 4 | 3 | 1 g | LBK | MIT-LIS | 1.278 | 0.327 | 7  |
| G14.1 | 4 | 3 | 1 g | LBK | MIT-LIS | 1.079 | 0.276 | 8  |
| G14.1 | 4 | 3 | 1 g | LBK | MIT-LIS | 0.809 | 0.324 | 9  |
| G14.1 | 4 | 3 | 1 g | LBK | MIT-LIS | 0.854 | 0.265 | 10 |
| G14.1 | 4 | 3 | 1 g | LBK | MIT-LIS | 0.738 | 0.385 | 11 |
| G14.1 | 4 | 3 | 1 g | LBK | MIT-LIS | 1.086 | 0.339 | 12 |
| G14.1 | 4 | 3 | 1 g | LBK | MIT-LIS | 0.789 | 0.277 | 13 |
| G14.1 | 4 | 3 | 1 g | LBK | MIT-LIS | 1.877 | 0.235 | 14 |
| G14.1 | 4 | 3 | 1 g | LBK | MIT-LIS | 1.122 | 0.239 | 15 |
| G14.1 | 4 | 3 | 1 g | LBK | MIT-LIS | 0.802 | 0.302 | 16 |
| G14.1 | 4 | 3 | 1 g | LBK | MIT-LIS | 0.854 | 0.272 | 17 |
| G14.1 | 4 | 3 | 1 g | LBK | MIT-LIS | 1.464 | 0.328 | 18 |
| G14.1 | 4 | 3 | 1 g | LBK | MIT-LIS | 0.992 | 0.328 | 19 |
| G14.1 | 4 | 3 | 1 g | LBK | MIT-LIS | 1.252 | 0.347 | 20 |
| G14.1 | 4 | 3 | 1 g | LBK | MIT-LIS | 1.514 | 0.315 | 21 |
| G14.1 | 4 | 3 | 1 g | LBK | MIT-LIS | 1.353 | 0.325 | 22 |

|       |   |   |     |     |         |       |       |    |
|-------|---|---|-----|-----|---------|-------|-------|----|
| G14.1 | 4 | 3 | 1 g | LBK | MIT-LIS | 1.027 | 0.234 | 23 |
| G14.1 | 4 | 3 | 1 g | LBK | MIT-LIS | 1.133 | 0.319 | 24 |
| G14.1 | 4 | 3 | 1 g | LBK | MIT-LIS | 1.031 | 0.249 | 25 |
| 1.1   | 1 | 1 | µg  | LBK | SS316   | 0.6   | 0.342 | 1  |
| 1.1   | 1 | 1 | µg  | LBK | SS316   | 0.663 | 0.331 | 2  |
| 1.1   | 1 | 1 | µg  | LBK | SS316   | 0.795 | 0.279 | 3  |
| 1.1   | 1 | 1 | µg  | LBK | SS316   | 0.938 | 0.251 | 4  |
| 1.1   | 1 | 1 | µg  | LBK | SS316   | 0.848 | 0.343 | 5  |
| 1.1   | 1 | 1 | µg  | LBK | SS316   | 0.724 | 0.389 | 6  |
| 1.1   | 1 | 1 | µg  | LBK | SS316   | 0.721 | 0.375 | 7  |
| 1.1   | 1 | 1 | µg  | LBK | SS316   | 0.83  | 0.322 | 8  |
| 1.1   | 1 | 1 | µg  | LBK | SS316   | 1.191 | 0.341 | 9  |
| 1.1   | 1 | 1 | µg  | LBK | SS316   | 0.808 | 0.365 | 10 |
| 1.1   | 1 | 1 | µg  | LBK | SS316   | 0.687 | 0.325 | 11 |
| 1.1   | 1 | 1 | µg  | LBK | SS316   | 0.557 | 0.392 | 12 |
| 1.1   | 1 | 1 | µg  | LBK | SS316   | 0.896 | 0.354 | 13 |
| 1.1   | 1 | 1 | µg  | LBK | SS316   | 0.812 | 0.396 | 14 |
| 1.1   | 1 | 1 | µg  | LBK | SS316   | 0.845 | 0.375 | 15 |
| 1.1   | 1 | 1 | µg  | LBK | SS316   | 1.075 | 0.526 | 16 |
| 1.1   | 1 | 1 | µg  | LBK | SS316   | 0.661 | 0.383 | 17 |
| 1.1   | 1 | 1 | µg  | LBK | SS316   | 0.581 | 0.354 | 18 |
| 1.1   | 1 | 1 | µg  | LBK | SS316   | 0.741 | 0.367 | 19 |
| 1.1   | 1 | 1 | µg  | LBK | SS316   | 0.968 | 0.474 | 20 |
| 1.1   | 1 | 1 | µg  | LBK | SS316   | 0.813 | 0.322 | 21 |
| 1.1   | 1 | 1 | µg  | LBK | SS316   | 0.711 | 0.459 | 22 |
| 1.1   | 1 | 1 | µg  | LBK | SS316   | 1.005 | 0.265 | 23 |
| 1.1   | 1 | 1 | µg  | LBK | SS316   | 1.2   | 0.409 | 24 |
| 1.1   | 1 | 1 | µg  | LBK | SS316   | 0.778 | 0.35  | 25 |
| 1.1   | 2 | 1 | µg  | LBK | SS316   | 1.138 | 0.337 | 1  |
| 1.1   | 2 | 1 | µg  | LBK | SS316   | 0.956 | 0.379 | 2  |
| 1.1   | 2 | 1 | µg  | LBK | SS316   | 1.062 | 0.336 | 3  |
| 1.1   | 2 | 1 | µg  | LBK | SS316   | 0.812 | 0.258 | 4  |
| 1.1   | 2 | 1 | µg  | LBK | SS316   | 1.074 | 0.3   | 5  |
| 1.1   | 2 | 1 | µg  | LBK | SS316   | 0.972 | 0.342 | 6  |
| 1.1   | 2 | 1 | µg  | LBK | SS316   | 0.759 | 0.384 | 7  |
| 1.1   | 2 | 1 | µg  | LBK | SS316   | 0.825 | 0.301 | 8  |
| 1.1   | 2 | 1 | µg  | LBK | SS316   | 0.96  | 0.523 | 9  |
| 1.1   | 2 | 1 | µg  | LBK | SS316   | 0.999 | 0.313 | 10 |
| 1.1   | 2 | 1 | µg  | LBK | SS316   | 0.885 | 0.346 | 11 |
| 1.1   | 2 | 1 | µg  | LBK | SS316   | 0.83  | 0.293 | 12 |
| 1.1   | 2 | 1 | µg  | LBK | SS316   | 0.631 | 0.29  | 13 |
| 1.1   | 2 | 1 | µg  | LBK | SS316   | 1.005 | 0.354 | 14 |
| 1.1   | 2 | 1 | µg  | LBK | SS316   | 0.842 | 0.346 | 15 |
| 1.1   | 2 | 1 | µg  | LBK | SS316   | 0.792 | 0.307 | 16 |
| 1.1   | 2 | 1 | µg  | LBK | SS316   | 0.808 | 0.333 | 17 |
| 1.1   | 2 | 1 | µg  | LBK | SS316   | 0.794 | 0.35  | 18 |
| 1.1   | 2 | 1 | µg  | LBK | SS316   | 1.036 | 0.425 | 19 |
| 1.1   | 2 | 1 | µg  | LBK | SS316   | 0.988 | 0.419 | 20 |
| 1.1   | 2 | 1 | µg  | LBK | SS316   | 0.941 | 0.333 | 21 |
| 1.1   | 2 | 1 | µg  | LBK | SS316   | 1.086 | 0.375 | 22 |

|     |   |   |    |     |       |       |       |    |
|-----|---|---|----|-----|-------|-------|-------|----|
| 1.1 | 2 | 1 | µg | LBK | SS316 | 0.855 | 0.409 | 23 |
| 1.1 | 2 | 1 | µg | LBK | SS316 | 0.744 | 0.273 | 24 |
| 1.1 | 2 | 1 | µg | LBK | SS316 | 1.181 | 0.373 | 25 |
| 1.1 | 3 | 1 | µg | LBK | SS316 | 0.696 | 0.324 | 1  |
| 1.1 | 3 | 1 | µg | LBK | SS316 | 0.753 | 0.422 | 2  |
| 1.1 | 3 | 1 | µg | LBK | SS316 | 0.82  | 0.456 | 3  |
| 1.1 | 3 | 1 | µg | LBK | SS316 | 0.586 | 0.353 | 4  |
| 1.1 | 3 | 1 | µg | LBK | SS316 | 0.695 | 0.377 | 5  |
| 1.1 | 3 | 1 | µg | LBK | SS316 | 0.632 | 0.381 | 6  |
| 1.1 | 3 | 1 | µg | LBK | SS316 | 0.735 | 0.333 | 7  |
| 1.1 | 3 | 1 | µg | LBK | SS316 | 0.795 | 0.326 | 8  |
| 1.1 | 3 | 1 | µg | LBK | SS316 | 0.922 | 0.353 | 9  |
| 1.1 | 3 | 1 | µg | LBK | SS316 | 0.598 | 0.389 | 10 |
| 1.1 | 3 | 1 | µg | LBK | SS316 | 0.674 | 0.375 | 11 |
| 1.1 | 3 | 1 | µg | LBK | SS316 | 0.754 | 0.292 | 12 |
| 1.1 | 3 | 1 | µg | LBK | SS316 | 0.825 | 0.39  | 13 |
| 1.1 | 3 | 1 | µg | LBK | SS316 | 0.633 | 0.323 | 14 |
| 1.1 | 3 | 1 | µg | LBK | SS316 | 0.608 | 0.382 | 15 |
| 1.1 | 3 | 1 | µg | LBK | SS316 | 0.755 | 0.344 | 16 |
| 1.1 | 3 | 1 | µg | LBK | SS316 | 0.597 | 0.455 | 17 |
| 1.1 | 3 | 1 | µg | LBK | SS316 | 1.018 | 0.293 | 18 |
| 1.1 | 3 | 1 | µg | LBK | SS316 | 0.711 | 0.413 | 19 |
| 1.1 | 3 | 1 | µg | LBK | SS316 | 0.732 | 0.29  | 20 |
| 1.1 | 3 | 1 | µg | LBK | SS316 | 0.717 | 0.296 | 21 |
| 1.1 | 3 | 1 | µg | LBK | SS316 | 0.852 | 0.329 | 22 |
| 1.1 | 3 | 1 | µg | LBK | SS316 | 0.962 | 0.324 | 23 |
| 1.1 | 3 | 1 | µg | LBK | SS316 | 0.809 | 0.304 | 24 |
| 1.1 | 3 | 1 | µg | LBK | SS316 | 0.904 | 0.394 | 25 |
| 1.1 | 4 | 1 | µg | LBK | SS316 | 0.717 | 0.334 | 1  |
| 1.1 | 4 | 1 | µg | LBK | SS316 | 1.054 | 0.288 | 2  |
| 1.1 | 4 | 1 | µg | LBK | SS316 | 0.911 | 0.304 | 3  |
| 1.1 | 4 | 1 | µg | LBK | SS316 | 0.828 | 0.357 | 4  |
| 1.1 | 4 | 1 | µg | LBK | SS316 | 0.988 | 0.221 | 5  |
| 1.1 | 4 | 1 | µg | LBK | SS316 | 0.679 | 0.354 | 6  |
| 1.1 | 4 | 1 | µg | LBK | SS316 | 0.654 | 0.367 | 7  |
| 1.1 | 4 | 1 | µg | LBK | SS316 | 0.957 | 0.317 | 8  |
| 1.1 | 4 | 1 | µg | LBK | SS316 | 0.637 | 0.367 | 9  |
| 1.1 | 4 | 1 | µg | LBK | SS316 | 0.999 | 0.333 | 10 |
| 1.1 | 4 | 1 | µg | LBK | SS316 | 0.998 | 0.389 | 11 |
| 1.1 | 4 | 1 | µg | LBK | SS316 | 0.84  | 0.299 | 12 |
| 1.1 | 4 | 1 | µg | LBK | SS316 | 1.052 | 0.333 | 13 |
| 1.1 | 4 | 1 | µg | LBK | SS316 | 1.322 | 0.334 | 14 |
| 1.1 | 4 | 1 | µg | LBK | SS316 | 0.919 | 0.379 | 15 |
| 1.1 | 4 | 1 | µg | LBK | SS316 | 0.909 | 0.285 | 16 |
| 1.1 | 4 | 1 | µg | LBK | SS316 | 0.813 | 0.342 | 17 |
| 1.1 | 4 | 1 | µg | LBK | SS316 | 0.691 | 0.346 | 18 |
| 1.1 | 4 | 1 | µg | LBK | SS316 | 1.007 | 0.41  | 19 |
| 1.1 | 4 | 1 | µg | LBK | SS316 | 0.932 | 0.337 | 20 |
| 1.1 | 4 | 1 | µg | LBK | SS316 | 1.058 | 0.243 | 21 |
| 1.1 | 4 | 1 | µg | LBK | SS316 | 0.764 | 0.379 | 22 |

|     |   |   |    |     |         |       |       |    |
|-----|---|---|----|-----|---------|-------|-------|----|
| 1.1 | 4 | 1 | µg | LBK | SS316   | 0.642 | 0.372 | 23 |
| 1.1 | 4 | 1 | µg | LBK | SS316   | 0.563 | 0.349 | 24 |
| 1.1 | 4 | 1 | µg | LBK | SS316   | 1.047 | 0.396 | 25 |
| 1.5 | 1 | 1 | µg | LBK | p-SS316 | 0.874 | 0.38  | 1  |
| 1.5 | 1 | 1 | µg | LBK | p-SS316 | 0.789 | 0.303 | 2  |
| 1.5 | 1 | 1 | µg | LBK | p-SS316 | 0.702 | 0.361 | 3  |
| 1.5 | 1 | 1 | µg | LBK | p-SS316 | 0.91  | 0.292 | 4  |
| 1.5 | 1 | 1 | µg | LBK | p-SS316 | 0.912 | 0.279 | 5  |
| 1.5 | 1 | 1 | µg | LBK | p-SS316 | 0.729 | 0.31  | 6  |
| 1.5 | 1 | 1 | µg | LBK | p-SS316 | 0.902 | 0.327 | 7  |
| 1.5 | 1 | 1 | µg | LBK | p-SS316 | 0.801 | 0.317 | 8  |
| 1.5 | 1 | 1 | µg | LBK | p-SS316 | 0.859 | 0.418 | 9  |
| 1.5 | 1 | 1 | µg | LBK | p-SS316 | 0.851 | 0.337 | 10 |
| 1.5 | 1 | 1 | µg | LBK | p-SS316 | 0.78  | 0.336 | 11 |
| 1.5 | 1 | 1 | µg | LBK | p-SS316 | 0.903 | 0.327 | 12 |
| 1.5 | 1 | 1 | µg | LBK | p-SS316 | 0.846 | 0.347 | 13 |
| 1.5 | 1 | 1 | µg | LBK | p-SS316 | 0.859 | 0.44  | 14 |
| 1.5 | 1 | 1 | µg | LBK | p-SS316 | 0.632 | 0.377 | 15 |
| 1.5 | 1 | 1 | µg | LBK | p-SS316 | 0.983 | 0.274 | 16 |
| 1.5 | 1 | 1 | µg | LBK | p-SS316 | 0.774 | 0.269 | 17 |
| 1.5 | 1 | 1 | µg | LBK | p-SS316 | 0.807 | 0.265 | 18 |
| 1.5 | 1 | 1 | µg | LBK | p-SS316 | 0.792 | 0.295 | 19 |
| 1.5 | 1 | 1 | µg | LBK | p-SS316 | 0.626 | 0.346 | 20 |
| 1.5 | 1 | 1 | µg | LBK | p-SS316 | 1.052 | 0.369 | 21 |
| 1.5 | 1 | 1 | µg | LBK | p-SS316 | 0.896 | 0.398 | 22 |
| 1.5 | 1 | 1 | µg | LBK | p-SS316 | 0.875 | 0.341 | 23 |
| 1.5 | 1 | 1 | µg | LBK | p-SS316 | 0.937 | 0.319 | 24 |
| 1.5 | 1 | 1 | µg | LBK | p-SS316 | 0.972 | 0.442 | 25 |
| 1.5 | 2 | 1 | µg | LBK | p-SS316 | 0.76  | 0.346 | 1  |
| 1.5 | 2 | 1 | µg | LBK | p-SS316 | 0.727 | 0.307 | 2  |
| 1.5 | 2 | 1 | µg | LBK | p-SS316 | 0.713 | 0.319 | 3  |
| 1.5 | 2 | 1 | µg | LBK | p-SS316 | 0.807 | 0.25  | 4  |
| 1.5 | 2 | 1 | µg | LBK | p-SS316 | 0.706 | 0.326 | 5  |
| 1.5 | 2 | 1 | µg | LBK | p-SS316 | 0.783 | 0.247 | 6  |
| 1.5 | 2 | 1 | µg | LBK | p-SS316 | 0.674 | 0.316 | 7  |
| 1.5 | 2 | 1 | µg | LBK | p-SS316 | 0.74  | 0.337 | 8  |
| 1.5 | 2 | 1 | µg | LBK | p-SS316 | 1.014 | 0.38  | 9  |
| 1.5 | 2 | 1 | µg | LBK | p-SS316 | 0.843 | 0.31  | 10 |
| 1.5 | 2 | 1 | µg | LBK | p-SS316 | 0.679 | 0.354 | 11 |
| 1.5 | 2 | 1 | µg | LBK | p-SS316 | 0.88  | 0.268 | 12 |
| 1.5 | 2 | 1 | µg | LBK | p-SS316 | 0.871 | 0.341 | 13 |
| 1.5 | 2 | 1 | µg | LBK | p-SS316 | 0.836 | 0.243 | 14 |
| 1.5 | 2 | 1 | µg | LBK | p-SS316 | 0.668 | 0.279 | 15 |
| 1.5 | 2 | 1 | µg | LBK | p-SS316 | 0.863 | 0.323 | 16 |
| 1.5 | 2 | 1 | µg | LBK | p-SS316 | 0.733 | 0.373 | 17 |
| 1.5 | 2 | 1 | µg | LBK | p-SS316 | 0.746 | 0.347 | 18 |
| 1.5 | 2 | 1 | µg | LBK | p-SS316 | 0.794 | 0.356 | 19 |
| 1.5 | 2 | 1 | µg | LBK | p-SS316 | 0.893 | 0.294 | 20 |
| 1.5 | 2 | 1 | µg | LBK | p-SS316 | 0.961 | 0.289 | 21 |
| 1.5 | 2 | 1 | µg | LBK | p-SS316 | 1.026 | 0.327 | 22 |

|     |   |   |    |     |         |       |       |    |
|-----|---|---|----|-----|---------|-------|-------|----|
| 1.5 | 2 | 1 | µg | LBK | p-SS316 | 0.714 | 0.327 | 23 |
| 1.5 | 2 | 1 | µg | LBK | p-SS316 | 0.884 | 0.274 | 24 |
| 1.5 | 2 | 1 | µg | LBK | p-SS316 | 0.782 | 0.336 | 25 |
| 1.5 | 3 | 1 | µg | LBK | p-SS316 | 0.955 | 0.313 | 1  |
| 1.5 | 3 | 1 | µg | LBK | p-SS316 | 0.57  | 0.346 | 2  |
| 1.5 | 3 | 1 | µg | LBK | p-SS316 | 0.711 | 0.387 | 3  |
| 1.5 | 3 | 1 | µg | LBK | p-SS316 | 0.775 | 0.322 | 4  |
| 1.5 | 3 | 1 | µg | LBK | p-SS316 | 0.596 | 0.365 | 5  |
| 1.5 | 3 | 1 | µg | LBK | p-SS316 | 0.543 | 0.367 | 6  |
| 1.5 | 3 | 1 | µg | LBK | p-SS316 | 0.731 | 0.341 | 7  |
| 1.5 | 3 | 1 | µg | LBK | p-SS316 | 0.811 | 0.319 | 8  |
| 1.5 | 3 | 1 | µg | LBK | p-SS316 | 0.823 | 0.317 | 9  |
| 1.5 | 3 | 1 | µg | LBK | p-SS316 | 0.565 | 0.305 | 10 |
| 1.5 | 3 | 1 | µg | LBK | p-SS316 | 0.729 | 0.299 | 11 |
| 1.5 | 3 | 1 | µg | LBK | p-SS316 | 0.835 | 0.328 | 12 |
| 1.5 | 3 | 1 | µg | LBK | p-SS316 | 0.686 | 0.333 | 13 |
| 1.5 | 3 | 1 | µg | LBK | p-SS316 | 0.844 | 0.347 | 14 |
| 1.5 | 3 | 1 | µg | LBK | p-SS316 | 0.665 | 0.333 | 15 |
| 1.5 | 3 | 1 | µg | LBK | p-SS316 | 0.919 | 0.375 | 16 |
| 1.5 | 3 | 1 | µg | LBK | p-SS316 | 0.67  | 0.277 | 17 |
| 1.5 | 3 | 1 | µg | LBK | p-SS316 | 1.02  | 0.32  | 18 |
| 1.5 | 3 | 1 | µg | LBK | p-SS316 | 0.733 | 0.31  | 19 |
| 1.5 | 3 | 1 | µg | LBK | p-SS316 | 0.847 | 0.319 | 20 |
| 1.5 | 3 | 1 | µg | LBK | p-SS316 | 1.039 | 0.317 | 21 |
| 1.5 | 3 | 1 | µg | LBK | p-SS316 | 0.713 | 0.35  | 22 |
| 1.5 | 3 | 1 | µg | LBK | p-SS316 | 0.692 | 0.31  | 23 |
| 1.5 | 3 | 1 | µg | LBK | p-SS316 | 0.721 | 0.333 | 24 |
| 1.5 | 3 | 1 | µg | LBK | p-SS316 | 0.765 | 0.31  | 25 |
| 1.5 | 4 | 1 | µg | LBK | p-SS316 | 0.842 | 0.301 | 1  |
| 1.5 | 4 | 1 | µg | LBK | p-SS316 | 0.837 | 0.307 | 2  |
| 1.5 | 4 | 1 | µg | LBK | p-SS316 | 0.741 | 0.303 | 3  |
| 1.5 | 4 | 1 | µg | LBK | p-SS316 | 0.828 | 0.346 | 4  |
| 1.5 | 4 | 1 | µg | LBK | p-SS316 | 0.733 | 0.361 | 5  |
| 1.5 | 4 | 1 | µg | LBK | p-SS316 | 0.965 | 0.317 | 6  |
| 1.5 | 4 | 1 | µg | LBK | p-SS316 | 0.848 | 0.286 | 7  |
| 1.5 | 4 | 1 | µg | LBK | p-SS316 | 0.795 | 0.387 | 8  |
| 1.5 | 4 | 1 | µg | LBK | p-SS316 | 0.793 | 0.305 | 9  |
| 1.5 | 4 | 1 | µg | LBK | p-SS316 | 0.902 | 0.307 | 10 |
| 1.5 | 4 | 1 | µg | LBK | p-SS316 | 0.922 | 0.301 | 11 |
| 1.5 | 4 | 1 | µg | LBK | p-SS316 | 0.927 | 0.334 | 12 |
| 1.5 | 4 | 1 | µg | LBK | p-SS316 | 0.739 | 0.342 | 13 |
| 1.5 | 4 | 1 | µg | LBK | p-SS316 | 0.797 | 0.283 | 14 |
| 1.5 | 4 | 1 | µg | LBK | p-SS316 | 0.711 | 0.317 | 15 |
| 1.5 | 4 | 1 | µg | LBK | p-SS316 | 0.764 | 0.341 | 16 |
| 1.5 | 4 | 1 | µg | LBK | p-SS316 | 0.707 | 0.288 | 17 |
| 1.5 | 4 | 1 | µg | LBK | p-SS316 | 1.003 | 0.334 | 18 |
| 1.5 | 4 | 1 | µg | LBK | p-SS316 | 0.852 | 0.318 | 19 |
| 1.5 | 4 | 1 | µg | LBK | p-SS316 | 0.831 | 0.317 | 20 |
| 1.5 | 4 | 1 | µg | LBK | p-SS316 | 1.009 | 0.299 | 21 |
| 1.5 | 4 | 1 | µg | LBK | p-SS316 | 0.888 | 0.33  | 22 |

|     |   |   |    |     |         |       |       |    |
|-----|---|---|----|-----|---------|-------|-------|----|
| 1.5 | 4 | 1 | µg | LBK | p-SS316 | 0.736 | 0.361 | 23 |
| 1.5 | 4 | 1 | µg | LBK | p-SS316 | 0.979 | 0.3   | 24 |
| 1.5 | 4 | 1 | µg | LBK | p-SS316 | 0.834 | 0.383 | 25 |
| 2.1 | 1 | 1 | µg | LBK | MIT-LIS | 1.214 | 0.393 | 1  |
| 2.1 | 1 | 1 | µg | LBK | MIT-LIS | 0.887 | 0.385 | 2  |
| 2.1 | 1 | 1 | µg | LBK | MIT-LIS | 0.81  | 0.382 | 3  |
| 2.1 | 1 | 1 | µg | LBK | MIT-LIS | 0.768 | 0.317 | 4  |
| 2.1 | 1 | 1 | µg | LBK | MIT-LIS | 0.674 | 0.327 | 5  |
| 2.1 | 1 | 1 | µg | LBK | MIT-LIS | 1.094 | 0.36  | 6  |
| 2.1 | 1 | 1 | µg | LBK | MIT-LIS | 0.939 | 0.397 | 7  |
| 2.1 | 1 | 1 | µg | LBK | MIT-LIS | 0.583 | 0.36  | 8  |
| 2.1 | 1 | 1 | µg | LBK | MIT-LIS | 0.806 | 0.344 | 9  |
| 2.1 | 1 | 1 | µg | LBK | MIT-LIS | 0.794 | 0.379 | 10 |
| 2.1 | 1 | 1 | µg | LBK | MIT-LIS | 0.954 | 0.368 | 11 |
| 2.1 | 1 | 1 | µg | LBK | MIT-LIS | 0.849 | 0.297 | 12 |
| 2.1 | 1 | 1 | µg | LBK | MIT-LIS | 0.954 | 0.346 | 13 |
| 2.1 | 1 | 1 | µg | LBK | MIT-LIS | 0.936 | 0.356 | 14 |
| 2.1 | 1 | 1 | µg | LBK | MIT-LIS | 0.805 | 0.302 | 15 |
| 2.1 | 1 | 1 | µg | LBK | MIT-LIS | 1.013 | 0.36  | 16 |
| 2.1 | 1 | 1 | µg | LBK | MIT-LIS | 1.146 | 0.302 | 17 |
| 2.1 | 1 | 1 | µg | LBK | MIT-LIS | 0.77  | 0.351 | 18 |
| 2.1 | 1 | 1 | µg | LBK | MIT-LIS | 0.661 | 0.322 | 19 |
| 2.1 | 1 | 1 | µg | LBK | MIT-LIS | 0.881 | 0.368 | 20 |
| 2.1 | 1 | 1 | µg | LBK | MIT-LIS | 0.876 | 0.346 | 21 |
| 2.1 | 1 | 1 | µg | LBK | MIT-LIS | 0.869 | 0.343 | 22 |
| 2.1 | 1 | 1 | µg | LBK | MIT-LIS | 0.825 | 0.325 | 23 |
| 2.1 | 1 | 1 | µg | LBK | MIT-LIS | 1.016 | 0.34  | 24 |
| 2.1 | 1 | 1 | µg | LBK | MIT-LIS | 0.784 | 0.28  | 25 |
| 2.1 | 2 | 1 | µg | LBK | MIT-LIS | 0.629 | 0.414 | 1  |
| 2.1 | 2 | 1 | µg | LBK | MIT-LIS | 0.782 | 0.368 | 2  |
| 2.1 | 2 | 1 | µg | LBK | MIT-LIS | 0.769 | 0.331 | 3  |
| 2.1 | 2 | 1 | µg | LBK | MIT-LIS | 0.787 | 0.335 | 4  |
| 2.1 | 2 | 1 | µg | LBK | MIT-LIS | 0.773 | 0.309 | 5  |
| 2.1 | 2 | 1 | µg | LBK | MIT-LIS | 0.734 | 0.251 | 6  |
| 2.1 | 2 | 1 | µg | LBK | MIT-LIS | 0.743 | 0.37  | 7  |
| 2.1 | 2 | 1 | µg | LBK | MIT-LIS | 0.764 | 0.322 | 8  |
| 2.1 | 2 | 1 | µg | LBK | MIT-LIS | 0.938 | 0.323 | 9  |
| 2.1 | 2 | 1 | µg | LBK | MIT-LIS | 0.698 | 0.391 | 10 |
| 2.1 | 2 | 1 | µg | LBK | MIT-LIS | 0.529 | 0.317 | 11 |
| 2.1 | 2 | 1 | µg | LBK | MIT-LIS | 0.823 | 0.356 | 12 |
| 2.1 | 2 | 1 | µg | LBK | MIT-LIS | 0.903 | 0.376 | 13 |
| 2.1 | 2 | 1 | µg | LBK | MIT-LIS | 0.719 | 0.292 | 14 |
| 2.1 | 2 | 1 | µg | LBK | MIT-LIS | 0.71  | 0.296 | 15 |
| 2.1 | 2 | 1 | µg | LBK | MIT-LIS | 0.875 | 0.345 | 16 |
| 2.1 | 2 | 1 | µg | LBK | MIT-LIS | 0.789 | 0.385 | 17 |
| 2.1 | 2 | 1 | µg | LBK | MIT-LIS | 0.971 | 0.355 | 18 |
| 2.1 | 2 | 1 | µg | LBK | MIT-LIS | 0.867 | 0.296 | 19 |
| 2.1 | 2 | 1 | µg | LBK | MIT-LIS | 0.771 | 0.368 | 20 |
| 2.1 | 2 | 1 | µg | LBK | MIT-LIS | 0.686 | 0.404 | 21 |
| 2.1 | 2 | 1 | µg | LBK | MIT-LIS | 0.64  | 0.309 | 22 |

|     |   |   |    |     |         |       |       |    |
|-----|---|---|----|-----|---------|-------|-------|----|
| 2.1 | 2 | 1 | µg | LBK | MIT-LIS | 0.798 | 0.371 | 23 |
| 2.1 | 2 | 1 | µg | LBK | MIT-LIS | 0.953 | 0.345 | 24 |
| 2.1 | 2 | 1 | µg | LBK | MIT-LIS | 0.745 | 0.291 | 25 |
| 2.1 | 3 | 1 | µg | LBK | MIT-LIS | 1.105 | 0.36  | 1  |
| 2.1 | 3 | 1 | µg | LBK | MIT-LIS | 0.778 | 0.355 | 2  |
| 2.1 | 3 | 1 | µg | LBK | MIT-LIS | 0.749 | 0.413 | 3  |
| 2.1 | 3 | 1 | µg | LBK | MIT-LIS | 0.683 | 0.302 | 4  |
| 2.1 | 3 | 1 | µg | LBK | MIT-LIS | 0.688 | 0.302 | 5  |
| 2.1 | 3 | 1 | µg | LBK | MIT-LIS | 0.929 | 0.32  | 6  |
| 2.1 | 3 | 1 | µg | LBK | MIT-LIS | 0.674 | 0.32  | 7  |
| 2.1 | 3 | 1 | µg | LBK | MIT-LIS | 0.728 | 0.355 | 8  |
| 2.1 | 3 | 1 | µg | LBK | MIT-LIS | 0.71  | 0.25  | 9  |
| 2.1 | 3 | 1 | µg | LBK | MIT-LIS | 0.769 | 0.296 | 10 |
| 2.1 | 3 | 1 | µg | LBK | MIT-LIS | 0.847 | 0.424 | 11 |
| 2.1 | 3 | 1 | µg | LBK | MIT-LIS | 0.637 | 0.281 | 12 |
| 2.1 | 3 | 1 | µg | LBK | MIT-LIS | 0.703 | 0.31  | 13 |
| 2.1 | 3 | 1 | µg | LBK | MIT-LIS | 0.529 | 0.393 | 14 |
| 2.1 | 3 | 1 | µg | LBK | MIT-LIS | 0.636 | 0.327 | 15 |
| 2.1 | 3 | 1 | µg | LBK | MIT-LIS | 0.629 | 0.355 | 16 |
| 2.1 | 3 | 1 | µg | LBK | MIT-LIS | 0.781 | 0.463 | 17 |
| 2.1 | 3 | 1 | µg | LBK | MIT-LIS | 0.712 | 0.299 | 18 |
| 2.1 | 3 | 1 | µg | LBK | MIT-LIS | 0.932 | 0.337 | 19 |
| 2.1 | 3 | 1 | µg | LBK | MIT-LIS | 1.006 | 0.397 | 20 |
| 2.1 | 3 | 1 | µg | LBK | MIT-LIS | 0.704 | 0.207 | 21 |
| 2.1 | 3 | 1 | µg | LBK | MIT-LIS | 0.543 | 0.376 | 22 |
| 2.1 | 3 | 1 | µg | LBK | MIT-LIS | 0.603 | 0.32  | 23 |
| 2.1 | 3 | 1 | µg | LBK | MIT-LIS | 0.806 | 0.36  | 24 |
| 2.1 | 3 | 1 | µg | LBK | MIT-LIS | 0.764 | 0.319 | 25 |
| 2.1 | 4 | 1 | µg | LBK | MIT-LIS | 0.629 | 0.411 | 1  |
| 2.1 | 4 | 1 | µg | LBK | MIT-LIS | 0.926 | 0.359 | 2  |
| 2.1 | 4 | 1 | µg | LBK | MIT-LIS | 0.767 | 0.331 | 3  |
| 2.1 | 4 | 1 | µg | LBK | MIT-LIS | 0.883 | 0.406 | 4  |
| 2.1 | 4 | 1 | µg | LBK | MIT-LIS | 0.734 | 0.343 | 5  |
| 2.1 | 4 | 1 | µg | LBK | MIT-LIS | 0.583 | 0.331 | 6  |
| 2.1 | 4 | 1 | µg | LBK | MIT-LIS | 1.014 | 0.351 | 7  |
| 2.1 | 4 | 1 | µg | LBK | MIT-LIS | 0.657 | 0.403 | 8  |
| 2.1 | 4 | 1 | µg | LBK | MIT-LIS | 0.958 | 0.319 | 9  |
| 2.1 | 4 | 1 | µg | LBK | MIT-LIS | 0.801 | 0.386 | 10 |
| 2.1 | 4 | 1 | µg | LBK | MIT-LIS | 0.855 | 0.348 | 11 |
| 2.1 | 4 | 1 | µg | LBK | MIT-LIS | 1.136 | 0.355 | 12 |
| 2.1 | 4 | 1 | µg | LBK | MIT-LIS | 0.71  | 0.323 | 13 |
| 2.1 | 4 | 1 | µg | LBK | MIT-LIS | 0.571 | 0.294 | 14 |
| 2.1 | 4 | 1 | µg | LBK | MIT-LIS | 0.862 | 0.349 | 15 |
| 2.1 | 4 | 1 | µg | LBK | MIT-LIS | 0.674 | 0.344 | 16 |
| 2.1 | 4 | 1 | µg | LBK | MIT-LIS | 0.603 | 0.393 | 17 |
| 2.1 | 4 | 1 | µg | LBK | MIT-LIS | 0.988 | 0.355 | 18 |
| 2.1 | 4 | 1 | µg | LBK | MIT-LIS | 0.615 | 0.379 | 19 |
| 2.1 | 4 | 1 | µg | LBK | MIT-LIS | 0.741 | 0.345 | 20 |
| 2.1 | 4 | 1 | µg | LBK | MIT-LIS | 0.771 | 0.403 | 21 |
| 2.1 | 4 | 1 | µg | LBK | MIT-LIS | 0.948 | 0.31  | 22 |

|     |   |   |    |     |         |       |       |    |
|-----|---|---|----|-----|---------|-------|-------|----|
| 2.1 | 4 | 1 | µg | LBK | MIT-LIS | 0.688 | 0.285 | 23 |
| 2.1 | 4 | 1 | µg | LBK | MIT-LIS | 0.785 | 0.345 | 24 |
| 2.1 | 4 | 1 | µg | LBK | MIT-LIS | 0.712 | 0.323 | 25 |
| 7.1 | 1 | 2 | µg | LBK | SS316   | 1.111 | 0.347 | 1  |
| 7.1 | 1 | 2 | µg | LBK | SS316   | 1.082 | 0.283 | 2  |
| 7.1 | 1 | 2 | µg | LBK | SS316   | 0.923 | 0.302 | 3  |
| 7.1 | 1 | 2 | µg | LBK | SS316   | 0.991 | 0.295 | 4  |
| 7.1 | 1 | 2 | µg | LBK | SS316   | 1.161 | 0.348 | 5  |
| 7.1 | 1 | 2 | µg | LBK | SS316   | 0.904 | 0.306 | 6  |
| 7.1 | 1 | 2 | µg | LBK | SS316   | 0.936 | 0.369 | 7  |
| 7.1 | 1 | 2 | µg | LBK | SS316   | 0.944 | 0.347 | 8  |
| 7.1 | 1 | 2 | µg | LBK | SS316   | 0.94  | 0.292 | 9  |
| 7.1 | 1 | 2 | µg | LBK | SS316   | 0.91  | 0.346 | 10 |
| 7.1 | 1 | 2 | µg | LBK | SS316   | 1.097 | 0.299 | 11 |
| 7.1 | 1 | 2 | µg | LBK | SS316   | 1.179 | 0.32  | 12 |
| 7.1 | 1 | 2 | µg | LBK | SS316   | 1.242 | 0.345 | 13 |
| 7.1 | 1 | 2 | µg | LBK | SS316   | 0.929 | 0.337 | 14 |
| 7.1 | 1 | 2 | µg | LBK | SS316   | 0.995 | 0.391 | 15 |
| 7.1 | 1 | 2 | µg | LBK | SS316   | 1.114 | 0.303 | 16 |
| 7.1 | 1 | 2 | µg | LBK | SS316   | 1.09  | 0.325 | 17 |
| 7.1 | 1 | 2 | µg | LBK | SS316   | 1.026 | 0.332 | 18 |
| 7.1 | 1 | 2 | µg | LBK | SS316   | 0.979 | 0.388 | 19 |
| 7.1 | 1 | 2 | µg | LBK | SS316   | 1.274 | 0.305 | 20 |
| 7.1 | 1 | 2 | µg | LBK | SS316   | 0.885 | 0.363 | 21 |
| 7.1 | 1 | 2 | µg | LBK | SS316   | 0.913 | 0.288 | 22 |
| 7.1 | 1 | 2 | µg | LBK | SS316   | 1.107 | 0.317 | 23 |
| 7.1 | 1 | 2 | µg | LBK | SS316   | 0.812 | 0.265 | 24 |
| 7.1 | 1 | 2 | µg | LBK | SS316   | 0.77  | 0.333 | 25 |
| 7.1 | 2 | 2 | µg | LBK | SS316   | 0.774 | 0.317 | 1  |
| 7.1 | 2 | 2 | µg | LBK | SS316   | 0.825 | 0.294 | 2  |
| 7.1 | 2 | 2 | µg | LBK | SS316   | 1.122 | 0.337 | 3  |
| 7.1 | 2 | 2 | µg | LBK | SS316   | 0.913 | 0.368 | 4  |
| 7.1 | 2 | 2 | µg | LBK | SS316   | 0.652 | 0.306 | 5  |
| 7.1 | 2 | 2 | µg | LBK | SS316   | 0.982 | 0.299 | 6  |
| 7.1 | 2 | 2 | µg | LBK | SS316   | 0.759 | 0.236 | 7  |
| 7.1 | 2 | 2 | µg | LBK | SS316   | 0.767 | 0.304 | 8  |
| 7.1 | 2 | 2 | µg | LBK | SS316   | 0.763 | 0.366 | 9  |
| 7.1 | 2 | 2 | µg | LBK | SS316   | 0.893 | 0.349 | 10 |
| 7.1 | 2 | 2 | µg | LBK | SS316   | 1.125 | 0.322 | 11 |
| 7.1 | 2 | 2 | µg | LBK | SS316   | 0.785 | 0.333 | 12 |
| 7.1 | 2 | 2 | µg | LBK | SS316   | 1.323 | 0.347 | 13 |
| 7.1 | 2 | 2 | µg | LBK | SS316   | 0.971 | 0.254 | 14 |
| 7.1 | 2 | 2 | µg | LBK | SS316   | 1.215 | 0.273 | 15 |
| 7.1 | 2 | 2 | µg | LBK | SS316   | 1.049 | 0.269 | 16 |
| 7.1 | 2 | 2 | µg | LBK | SS316   | 1.155 | 0.336 | 17 |
| 7.1 | 2 | 2 | µg | LBK | SS316   | 0.868 | 0.274 | 18 |
| 7.1 | 2 | 2 | µg | LBK | SS316   | 1.015 | 0.329 | 19 |
| 7.1 | 2 | 2 | µg | LBK | SS316   | 0.769 | 0.297 | 20 |
| 7.1 | 2 | 2 | µg | LBK | SS316   | 0.712 | 0.31  | 21 |
| 7.1 | 2 | 2 | µg | LBK | SS316   | 1.523 | 0.26  | 22 |

|     |   |   |    |     |       |       |       |    |
|-----|---|---|----|-----|-------|-------|-------|----|
| 7.1 | 2 | 2 | µg | LBK | SS316 | 0.849 | 0.266 | 23 |
| 7.1 | 2 | 2 | µg | LBK | SS316 | 0.857 | 0.336 | 24 |
| 7.1 | 2 | 2 | µg | LBK | SS316 | 0.968 | 0.3   | 25 |
| 7.1 | 3 | 2 | µg | LBK | SS316 | 0.937 | 0.336 | 1  |
| 7.1 | 3 | 2 | µg | LBK | SS316 | 0.998 | 0.327 | 2  |
| 7.1 | 3 | 2 | µg | LBK | SS316 | 0.796 | 0.331 | 3  |
| 7.1 | 3 | 2 | µg | LBK | SS316 | 0.907 | 0.32  | 4  |
| 7.1 | 3 | 2 | µg | LBK | SS316 | 1.079 | 0.303 | 5  |
| 7.1 | 3 | 2 | µg | LBK | SS316 | 1.068 | 0.289 | 6  |
| 7.1 | 3 | 2 | µg | LBK | SS316 | 1.119 | 0.249 | 7  |
| 7.1 | 3 | 2 | µg | LBK | SS316 | 0.728 | 0.366 | 8  |
| 7.1 | 3 | 2 | µg | LBK | SS316 | 0.757 | 0.342 | 9  |
| 7.1 | 3 | 2 | µg | LBK | SS316 | 0.8   | 0.306 | 10 |
| 7.1 | 3 | 2 | µg | LBK | SS316 | 0.952 | 0.357 | 11 |
| 7.1 | 3 | 2 | µg | LBK | SS316 | 1.177 | 0.359 | 12 |
| 7.1 | 3 | 2 | µg | LBK | SS316 | 0.606 | 0.344 | 13 |
| 7.1 | 3 | 2 | µg | LBK | SS316 | 0.885 | 0.369 | 14 |
| 7.1 | 3 | 2 | µg | LBK | SS316 | 1.245 | 0.31  | 15 |
| 7.1 | 3 | 2 | µg | LBK | SS316 | 0.86  | 0.251 | 16 |
| 7.1 | 3 | 2 | µg | LBK | SS316 | 0.656 | 0.353 | 17 |
| 7.1 | 3 | 2 | µg | LBK | SS316 | 0.859 | 0.326 | 18 |
| 7.1 | 3 | 2 | µg | LBK | SS316 | 0.928 | 0.377 | 19 |
| 7.1 | 3 | 2 | µg | LBK | SS316 | 1.075 | 0.392 | 20 |
| 7.1 | 3 | 2 | µg | LBK | SS316 | 0.862 | 0.341 | 21 |
| 7.1 | 3 | 2 | µg | LBK | SS316 | 1.049 | 0.381 | 22 |
| 7.1 | 3 | 2 | µg | LBK | SS316 | 1.082 | 0.367 | 23 |
| 7.1 | 3 | 2 | µg | LBK | SS316 | 0.912 | 0.339 | 24 |
| 7.1 | 3 | 2 | µg | LBK | SS316 | 1.22  | 0.305 | 25 |
| 7.1 | 4 | 2 | µg | LBK | SS316 | 1.023 | 0.348 | 1  |
| 7.1 | 4 | 2 | µg | LBK | SS316 | 1.141 | 0.277 | 2  |
| 7.1 | 4 | 2 | µg | LBK | SS316 | 0.83  | 0.362 | 3  |
| 7.1 | 4 | 2 | µg | LBK | SS316 | 0.96  | 0.327 | 4  |
| 7.1 | 4 | 2 | µg | LBK | SS316 | 0.64  | 0.344 | 5  |
| 7.1 | 4 | 2 | µg | LBK | SS316 | 1.131 | 0.378 | 6  |
| 7.1 | 4 | 2 | µg | LBK | SS316 | 0.949 | 0.334 | 7  |
| 7.1 | 4 | 2 | µg | LBK | SS316 | 1.136 | 0.312 | 8  |
| 7.1 | 4 | 2 | µg | LBK | SS316 | 0.898 | 0.354 | 9  |
| 7.1 | 4 | 2 | µg | LBK | SS316 | 1.043 | 0.324 | 10 |
| 7.1 | 4 | 2 | µg | LBK | SS316 | 0.849 | 0.377 | 11 |
| 7.1 | 4 | 2 | µg | LBK | SS316 | 0.896 | 0.288 | 12 |
| 7.1 | 4 | 2 | µg | LBK | SS316 | 0.843 | 0.321 | 13 |
| 7.1 | 4 | 2 | µg | LBK | SS316 | 0.717 | 0.351 | 14 |
| 7.1 | 4 | 2 | µg | LBK | SS316 | 1.103 | 0.317 | 15 |
| 7.1 | 4 | 2 | µg | LBK | SS316 | 1.448 | 0.348 | 16 |
| 7.1 | 4 | 2 | µg | LBK | SS316 | 0.945 | 0.318 | 17 |
| 7.1 | 4 | 2 | µg | LBK | SS316 | 1.207 | 0.321 | 18 |
| 7.1 | 4 | 2 | µg | LBK | SS316 | 0.821 | 0.329 | 19 |
| 7.1 | 4 | 2 | µg | LBK | SS316 | 0.85  | 0.331 | 20 |
| 7.1 | 4 | 2 | µg | LBK | SS316 | 1.201 | 0.302 | 21 |
| 7.1 | 4 | 2 | µg | LBK | SS316 | 0.981 | 0.327 | 22 |

|     |   |   |    |     |         |       |       |    |
|-----|---|---|----|-----|---------|-------|-------|----|
| 7.1 | 4 | 2 | µg | LBK | SS316   | 1.36  | 0.308 | 23 |
| 7.1 | 4 | 2 | µg | LBK | SS316   | 1.182 | 0.312 | 24 |
| 7.1 | 4 | 2 | µg | LBK | SS316   | 1.263 | 0.317 | 25 |
| 7.5 | 1 | 2 | µg | LBK | p-SS316 | 0.924 | 0.288 | 1  |
| 7.5 | 1 | 2 | µg | LBK | p-SS316 | 1.01  | 0.32  | 2  |
| 7.5 | 1 | 2 | µg | LBK | p-SS316 | 1.06  | 0.286 | 3  |
| 7.5 | 1 | 2 | µg | LBK | p-SS316 | 1.003 | 0.317 | 4  |
| 7.5 | 1 | 2 | µg | LBK | p-SS316 | 0.95  | 0.316 | 5  |
| 7.5 | 1 | 2 | µg | LBK | p-SS316 | 1.021 | 0.252 | 6  |
| 7.5 | 1 | 2 | µg | LBK | p-SS316 | 0.745 | 0.283 | 7  |
| 7.5 | 1 | 2 | µg | LBK | p-SS316 | 0.725 | 0.254 | 8  |
| 7.5 | 1 | 2 | µg | LBK | p-SS316 | 0.779 | 0.254 | 9  |
| 7.5 | 1 | 2 | µg | LBK | p-SS316 | 0.901 | 0.293 | 10 |
| 7.5 | 1 | 2 | µg | LBK | p-SS316 | 1.269 | 0.326 | 11 |
| 7.5 | 1 | 2 | µg | LBK | p-SS316 | 0.73  | 0.295 | 12 |
| 7.5 | 1 | 2 | µg | LBK | p-SS316 | 0.861 | 0.363 | 13 |
| 7.5 | 1 | 2 | µg | LBK | p-SS316 | 0.876 | 0.356 | 14 |
| 7.5 | 1 | 2 | µg | LBK | p-SS316 | 0.946 | 0.277 | 15 |
| 7.5 | 1 | 2 | µg | LBK | p-SS316 | 0.822 | 0.235 | 16 |
| 7.5 | 1 | 2 | µg | LBK | p-SS316 | 0.795 | 0.298 | 17 |
| 7.5 | 1 | 2 | µg | LBK | p-SS316 | 0.967 | 0.245 | 18 |
| 7.5 | 1 | 2 | µg | LBK | p-SS316 | 0.76  | 0.264 | 19 |
| 7.5 | 1 | 2 | µg | LBK | p-SS316 | 1.18  | 0.31  | 20 |
| 7.5 | 1 | 2 | µg | LBK | p-SS316 | 1.244 | 0.28  | 21 |
| 7.5 | 1 | 2 | µg | LBK | p-SS316 | 0.762 | 0.302 | 22 |
| 7.5 | 1 | 2 | µg | LBK | p-SS316 | 0.991 | 0.298 | 23 |
| 7.5 | 1 | 2 | µg | LBK | p-SS316 | 1.151 | 0.31  | 24 |
| 7.5 | 1 | 2 | µg | LBK | p-SS316 | 0.839 | 0.287 | 25 |
| 7.5 | 2 | 2 | µg | LBK | p-SS316 | 0.811 | 0.284 | 1  |
| 7.5 | 2 | 2 | µg | LBK | p-SS316 | 1.043 | 0.381 | 2  |
| 7.5 | 2 | 2 | µg | LBK | p-SS316 | 0.794 | 0.272 | 3  |
| 7.5 | 2 | 2 | µg | LBK | p-SS316 | 0.779 | 0.304 | 4  |
| 7.5 | 2 | 2 | µg | LBK | p-SS316 | 1.169 | 0.34  | 5  |
| 7.5 | 2 | 2 | µg | LBK | p-SS316 | 0.974 | 0.272 | 6  |
| 7.5 | 2 | 2 | µg | LBK | p-SS316 | 0.943 | 0.362 | 7  |
| 7.5 | 2 | 2 | µg | LBK | p-SS316 | 0.851 | 0.29  | 8  |
| 7.5 | 2 | 2 | µg | LBK | p-SS316 | 1.196 | 0.256 | 9  |
| 7.5 | 2 | 2 | µg | LBK | p-SS316 | 0.92  | 0.334 | 10 |
| 7.5 | 2 | 2 | µg | LBK | p-SS316 | 0.895 | 0.318 | 11 |
| 7.5 | 2 | 2 | µg | LBK | p-SS316 | 1.078 | 0.346 | 12 |
| 7.5 | 2 | 2 | µg | LBK | p-SS316 | 0.878 | 0.304 | 13 |
| 7.5 | 2 | 2 | µg | LBK | p-SS316 | 0.913 | 0.344 | 14 |
| 7.5 | 2 | 2 | µg | LBK | p-SS316 | 1.115 | 0.332 | 15 |
| 7.5 | 2 | 2 | µg | LBK | p-SS316 | 0.923 | 0.329 | 16 |
| 7.5 | 2 | 2 | µg | LBK | p-SS316 | 0.965 | 0.314 | 17 |
| 7.5 | 2 | 2 | µg | LBK | p-SS316 | 0.939 | 0.281 | 18 |
| 7.5 | 2 | 2 | µg | LBK | p-SS316 | 0.751 | 0.391 | 19 |
| 7.5 | 2 | 2 | µg | LBK | p-SS316 | 1.028 | 0.3   | 20 |
| 7.5 | 2 | 2 | µg | LBK | p-SS316 | 0.777 | 0.321 | 21 |
| 7.5 | 2 | 2 | µg | LBK | p-SS316 | 0.865 | 0.304 | 22 |

|     |   |   |    |     |         |       |       |    |
|-----|---|---|----|-----|---------|-------|-------|----|
| 7.5 | 2 | 2 | µg | LBK | p-SS316 | 0.707 | 0.344 | 23 |
| 7.5 | 2 | 2 | µg | LBK | p-SS316 | 0.616 | 0.321 | 24 |
| 7.5 | 2 | 2 | µg | LBK | p-SS316 | 0.825 | 0.298 | 25 |
| 7.5 | 3 | 2 | µg | LBK | p-SS316 | 0.896 | 0.345 | 1  |
| 7.5 | 3 | 2 | µg | LBK | p-SS316 | 0.728 | 0.343 | 2  |
| 7.5 | 3 | 2 | µg | LBK | p-SS316 | 0.913 | 0.327 | 3  |
| 7.5 | 3 | 2 | µg | LBK | p-SS316 | 0.86  | 0.319 | 4  |
| 7.5 | 3 | 2 | µg | LBK | p-SS316 | 0.737 | 0.356 | 5  |
| 7.5 | 3 | 2 | µg | LBK | p-SS316 | 0.821 | 0.283 | 6  |
| 7.5 | 3 | 2 | µg | LBK | p-SS316 | 0.823 | 0.356 | 7  |
| 7.5 | 3 | 2 | µg | LBK | p-SS316 | 0.912 | 0.308 | 8  |
| 7.5 | 3 | 2 | µg | LBK | p-SS316 | 0.835 | 0.368 | 9  |
| 7.5 | 3 | 2 | µg | LBK | p-SS316 | 0.81  | 0.348 | 10 |
| 7.5 | 3 | 2 | µg | LBK | p-SS316 | 0.828 | 0.374 | 11 |
| 7.5 | 3 | 2 | µg | LBK | p-SS316 | 0.966 | 0.371 | 12 |
| 7.5 | 3 | 2 | µg | LBK | p-SS316 | 1.089 | 0.283 | 13 |
| 7.5 | 3 | 2 | µg | LBK | p-SS316 | 0.823 | 0.35  | 14 |
| 7.5 | 3 | 2 | µg | LBK | p-SS316 | 1.066 | 0.276 | 15 |
| 7.5 | 3 | 2 | µg | LBK | p-SS316 | 0.981 | 0.267 | 16 |
| 7.5 | 3 | 2 | µg | LBK | p-SS316 | 0.764 | 0.331 | 17 |
| 7.5 | 3 | 2 | µg | LBK | p-SS316 | 0.846 | 0.333 | 18 |
| 7.5 | 3 | 2 | µg | LBK | p-SS316 | 0.724 | 0.288 | 19 |
| 7.5 | 3 | 2 | µg | LBK | p-SS316 | 0.995 | 0.319 | 20 |
| 7.5 | 3 | 2 | µg | LBK | p-SS316 | 0.714 | 0.309 | 21 |
| 7.5 | 3 | 2 | µg | LBK | p-SS316 | 0.761 | 0.26  | 22 |
| 7.5 | 3 | 2 | µg | LBK | p-SS316 | 0.777 | 0.28  | 23 |
| 7.5 | 3 | 2 | µg | LBK | p-SS316 | 0.764 | 0.315 | 24 |
| 7.5 | 3 | 2 | µg | LBK | p-SS316 | 0.861 | 0.377 | 25 |
| 7.5 | 4 | 2 | µg | LBK | p-SS316 | 0.925 | 0.333 | 1  |
| 7.5 | 4 | 2 | µg | LBK | p-SS316 | 1.12  | 0.366 | 2  |
| 7.5 | 4 | 2 | µg | LBK | p-SS316 | 1.07  | 0.352 | 3  |
| 7.5 | 4 | 2 | µg | LBK | p-SS316 | 1.341 | 0.283 | 4  |
| 7.5 | 4 | 2 | µg | LBK | p-SS316 | 0.954 | 0.298 | 5  |
| 7.5 | 4 | 2 | µg | LBK | p-SS316 | 0.863 | 0.317 | 6  |
| 7.5 | 4 | 2 | µg | LBK | p-SS316 | 1.204 | 0.344 | 7  |
| 7.5 | 4 | 2 | µg | LBK | p-SS316 | 1.365 | 0.348 | 8  |
| 7.5 | 4 | 2 | µg | LBK | p-SS316 | 0.888 | 0.343 | 9  |
| 7.5 | 4 | 2 | µg | LBK | p-SS316 | 0.875 | 0.403 | 10 |
| 7.5 | 4 | 2 | µg | LBK | p-SS316 | 1.176 | 0.29  | 11 |
| 7.5 | 4 | 2 | µg | LBK | p-SS316 | 1.007 | 0.349 | 12 |
| 7.5 | 4 | 2 | µg | LBK | p-SS316 | 0.948 | 0.336 | 13 |
| 7.5 | 4 | 2 | µg | LBK | p-SS316 | 0.995 | 0.368 | 14 |
| 7.5 | 4 | 2 | µg | LBK | p-SS316 | 1.187 | 0.309 | 15 |
| 7.5 | 4 | 2 | µg | LBK | p-SS316 | 1.366 | 0.352 | 16 |
| 7.5 | 4 | 2 | µg | LBK | p-SS316 | 0.863 | 0.349 | 17 |
| 7.5 | 4 | 2 | µg | LBK | p-SS316 | 1.395 | 0.326 | 18 |
| 7.5 | 4 | 2 | µg | LBK | p-SS316 | 1.233 | 0.349 | 19 |
| 7.5 | 4 | 2 | µg | LBK | p-SS316 | 1.262 | 0.321 | 20 |
| 7.5 | 4 | 2 | µg | LBK | p-SS316 | 1.162 | 0.33  | 21 |
| 7.5 | 4 | 2 | µg | LBK | p-SS316 | 0.949 | 0.31  | 22 |

|     |   |   |    |     |         |       |       |    |
|-----|---|---|----|-----|---------|-------|-------|----|
| 7.5 | 4 | 2 | µg | LBK | p-SS316 | 0.773 | 0.338 | 23 |
| 7.5 | 4 | 2 | µg | LBK | p-SS316 | 1.329 | 0.34  | 24 |
| 7.5 | 4 | 2 | µg | LBK | p-SS316 | 0.784 | 0.338 | 25 |
| 8.1 | 1 | 2 | µg | LBK | MIT-LIS | 0.81  | 0.282 | 1  |
| 8.1 | 1 | 2 | µg | LBK | MIT-LIS | 0.839 | 0.287 | 2  |
| 8.1 | 1 | 2 | µg | LBK | MIT-LIS | 0.717 | 0.305 | 3  |
| 8.1 | 1 | 2 | µg | LBK | MIT-LIS | 0.876 | 0.232 | 4  |
| 8.1 | 1 | 2 | µg | LBK | MIT-LIS | 0.713 | 0.386 | 5  |
| 8.1 | 1 | 2 | µg | LBK | MIT-LIS | 0.71  | 0.287 | 6  |
| 8.1 | 1 | 2 | µg | LBK | MIT-LIS | 0.702 | 0.253 | 7  |
| 8.1 | 1 | 2 | µg | LBK | MIT-LIS | 0.937 | 0.255 | 8  |
| 8.1 | 1 | 2 | µg | LBK | MIT-LIS | 0.925 | 0.304 | 9  |
| 8.1 | 1 | 2 | µg | LBK | MIT-LIS | 0.965 | 0.333 | 10 |
| 8.1 | 1 | 2 | µg | LBK | MIT-LIS | 0.934 | 0.361 | 11 |
| 8.1 | 1 | 2 | µg | LBK | MIT-LIS | 0.96  | 0.305 | 12 |
| 8.1 | 1 | 2 | µg | LBK | MIT-LIS | 1.087 | 0.324 | 13 |
| 8.1 | 1 | 2 | µg | LBK | MIT-LIS | 1.046 | 0.275 | 14 |
| 8.1 | 1 | 2 | µg | LBK | MIT-LIS | 0.803 | 0.351 | 15 |
| 8.1 | 1 | 2 | µg | LBK | MIT-LIS | 0.974 | 0.375 | 16 |
| 8.1 | 1 | 2 | µg | LBK | MIT-LIS | 0.688 | 0.284 | 17 |
| 8.1 | 1 | 2 | µg | LBK | MIT-LIS | 0.779 | 0.315 | 18 |
| 8.1 | 1 | 2 | µg | LBK | MIT-LIS | 1.101 | 0.345 | 19 |
| 8.1 | 1 | 2 | µg | LBK | MIT-LIS | 0.76  | 0.315 | 20 |
| 8.1 | 1 | 2 | µg | LBK | MIT-LIS | 0.724 | 0.254 | 21 |
| 8.1 | 1 | 2 | µg | LBK | MIT-LIS | 0.672 | 0.332 | 22 |
| 8.1 | 1 | 2 | µg | LBK | MIT-LIS | 0.983 | 0.278 | 23 |
| 8.1 | 1 | 2 | µg | LBK | MIT-LIS | 0.79  | 0.297 | 24 |
| 8.1 | 1 | 2 | µg | LBK | MIT-LIS | 1.116 | 0.388 | 25 |
| 8.1 | 2 | 2 | µg | LBK | MIT-LIS | 1.046 | 0.39  | 1  |
| 8.1 | 2 | 2 | µg | LBK | MIT-LIS | 0.885 | 0.355 | 2  |
| 8.1 | 2 | 2 | µg | LBK | MIT-LIS | 0.811 | 0.292 | 3  |
| 8.1 | 2 | 2 | µg | LBK | MIT-LIS | 0.843 | 0.299 | 4  |
| 8.1 | 2 | 2 | µg | LBK | MIT-LIS | 0.681 | 0.313 | 5  |
| 8.1 | 2 | 2 | µg | LBK | MIT-LIS | 0.639 | 0.317 | 6  |
| 8.1 | 2 | 2 | µg | LBK | MIT-LIS | 0.83  | 0.335 | 7  |
| 8.1 | 2 | 2 | µg | LBK | MIT-LIS | 0.757 | 0.375 | 8  |
| 8.1 | 2 | 2 | µg | LBK | MIT-LIS | 0.882 | 0.305 | 9  |
| 8.1 | 2 | 2 | µg | LBK | MIT-LIS | 0.774 | 0.378 | 10 |
| 8.1 | 2 | 2 | µg | LBK | MIT-LIS | 1.205 | 0.323 | 11 |
| 8.1 | 2 | 2 | µg | LBK | MIT-LIS | 0.819 | 0.244 | 12 |
| 8.1 | 2 | 2 | µg | LBK | MIT-LIS | 0.779 | 0.299 | 13 |
| 8.1 | 2 | 2 | µg | LBK | MIT-LIS | 1.417 | 0.353 | 14 |
| 8.1 | 2 | 2 | µg | LBK | MIT-LIS | 0.95  | 0.276 | 15 |
| 8.1 | 2 | 2 | µg | LBK | MIT-LIS | 1.058 | 0.395 | 16 |
| 8.1 | 2 | 2 | µg | LBK | MIT-LIS | 0.946 | 0.305 | 17 |
| 8.1 | 2 | 2 | µg | LBK | MIT-LIS | 1.036 | 0.308 | 18 |
| 8.1 | 2 | 2 | µg | LBK | MIT-LIS | 0.727 | 0.393 | 19 |
| 8.1 | 2 | 2 | µg | LBK | MIT-LIS | 0.979 | 0.395 | 20 |
| 8.1 | 2 | 2 | µg | LBK | MIT-LIS | 0.976 | 0.265 | 21 |
| 8.1 | 2 | 2 | µg | LBK | MIT-LIS | 0.761 | 0.312 | 22 |

|     |   |   |    |     |         |       |       |    |
|-----|---|---|----|-----|---------|-------|-------|----|
| 8.1 | 2 | 2 | µg | LBK | MIT-LIS | 0.733 | 0.361 | 23 |
| 8.1 | 2 | 2 | µg | LBK | MIT-LIS | 0.702 | 0.321 | 24 |
| 8.1 | 2 | 2 | µg | LBK | MIT-LIS | 1.141 | 0.39  | 25 |
| 8.1 | 3 | 2 | µg | LBK | MIT-LIS | 0.88  | 0.341 | 1  |
| 8.1 | 3 | 2 | µg | LBK | MIT-LIS | 0.653 | 0.356 | 2  |
| 8.1 | 3 | 2 | µg | LBK | MIT-LIS | 1.012 | 0.294 | 3  |
| 8.1 | 3 | 2 | µg | LBK | MIT-LIS | 0.776 | 0.401 | 4  |
| 8.1 | 3 | 2 | µg | LBK | MIT-LIS | 0.709 | 0.312 | 5  |
| 8.1 | 3 | 2 | µg | LBK | MIT-LIS | 0.722 | 0.348 | 6  |
| 8.1 | 3 | 2 | µg | LBK | MIT-LIS | 0.624 | 0.289 | 7  |
| 8.1 | 3 | 2 | µg | LBK | MIT-LIS | 0.604 | 0.288 | 8  |
| 8.1 | 3 | 2 | µg | LBK | MIT-LIS | 0.643 | 0.257 | 9  |
| 8.1 | 3 | 2 | µg | LBK | MIT-LIS | 0.876 | 0.357 | 10 |
| 8.1 | 3 | 2 | µg | LBK | MIT-LIS | 0.776 | 0.281 | 11 |
| 8.1 | 3 | 2 | µg | LBK | MIT-LIS | 0.897 | 0.294 | 12 |
| 8.1 | 3 | 2 | µg | LBK | MIT-LIS | 0.661 | 0.296 | 13 |
| 8.1 | 3 | 2 | µg | LBK | MIT-LIS | 0.894 | 0.339 | 14 |
| 8.1 | 3 | 2 | µg | LBK | MIT-LIS | 0.721 | 0.245 | 15 |
| 8.1 | 3 | 2 | µg | LBK | MIT-LIS | 0.806 | 0.365 | 16 |
| 8.1 | 3 | 2 | µg | LBK | MIT-LIS | 0.713 | 0.344 | 17 |
| 8.1 | 3 | 2 | µg | LBK | MIT-LIS | 0.788 | 0.411 | 18 |
| 8.1 | 3 | 2 | µg | LBK | MIT-LIS | 0.943 | 0.315 | 19 |
| 8.1 | 3 | 2 | µg | LBK | MIT-LIS | 0.677 | 0.334 | 20 |
| 8.1 | 3 | 2 | µg | LBK | MIT-LIS | 0.802 | 0.349 | 21 |
| 8.1 | 3 | 2 | µg | LBK | MIT-LIS | 0.762 | 0.341 | 22 |
| 8.1 | 3 | 2 | µg | LBK | MIT-LIS | 0.684 | 0.289 | 23 |
| 8.1 | 3 | 2 | µg | LBK | MIT-LIS | 0.817 | 0.341 | 24 |
| 8.1 | 3 | 2 | µg | LBK | MIT-LIS | 0.743 | 0.273 | 25 |
| 8.1 | 4 | 2 | µg | LBK | MIT-LIS | 0.796 | 0.279 | 1  |
| 8.1 | 4 | 2 | µg | LBK | MIT-LIS | 0.721 | 0.313 | 2  |
| 8.1 | 4 | 2 | µg | LBK | MIT-LIS | 0.596 | 0.25  | 3  |
| 8.1 | 4 | 2 | µg | LBK | MIT-LIS | 0.73  | 0.286 | 4  |
| 8.1 | 4 | 2 | µg | LBK | MIT-LIS | 0.929 | 0.274 | 5  |
| 8.1 | 4 | 2 | µg | LBK | MIT-LIS | 0.884 | 0.334 | 6  |
| 8.1 | 4 | 2 | µg | LBK | MIT-LIS | 0.687 | 0.32  | 7  |
| 8.1 | 4 | 2 | µg | LBK | MIT-LIS | 0.763 | 0.302 | 8  |
| 8.1 | 4 | 2 | µg | LBK | MIT-LIS | 0.884 | 0.335 | 9  |
| 8.1 | 4 | 2 | µg | LBK | MIT-LIS | 0.693 | 0.329 | 10 |
| 8.1 | 4 | 2 | µg | LBK | MIT-LIS | 0.841 | 0.309 | 11 |
| 8.1 | 4 | 2 | µg | LBK | MIT-LIS | 0.682 | 0.311 | 12 |
| 8.1 | 4 | 2 | µg | LBK | MIT-LIS | 0.797 | 0.312 | 13 |
| 8.1 | 4 | 2 | µg | LBK | MIT-LIS | 0.828 | 0.333 | 14 |
| 8.1 | 4 | 2 | µg | LBK | MIT-LIS | 0.757 | 0.287 | 15 |
| 8.1 | 4 | 2 | µg | LBK | MIT-LIS | 0.738 | 0.285 | 16 |
| 8.1 | 4 | 2 | µg | LBK | MIT-LIS | 0.816 | 0.373 | 17 |
| 8.1 | 4 | 2 | µg | LBK | MIT-LIS | 0.761 | 0.348 | 18 |
| 8.1 | 4 | 2 | µg | LBK | MIT-LIS | 0.822 | 0.403 | 19 |
| 8.1 | 4 | 2 | µg | LBK | MIT-LIS | 0.909 | 0.335 | 20 |
| 8.1 | 4 | 2 | µg | LBK | MIT-LIS | 0.837 | 0.369 | 21 |
| 8.1 | 4 | 2 | µg | LBK | MIT-LIS | 0.877 | 0.398 | 22 |

|      |   |   |    |     |         |           |           |    |
|------|---|---|----|-----|---------|-----------|-----------|----|
| 8.1  | 4 | 2 | µg | LBK | MIT-LIS | 0.856     | 0.267     | 23 |
| 8.1  | 4 | 2 | µg | LBK | MIT-LIS | 0.775     | 0.315     | 24 |
| 8.1  | 4 | 2 | µg | LBK | MIT-LIS | 1.009     | 0.367     | 25 |
| 13.1 | 1 | 3 | µg | LBK | SS316   | 0.8371875 | 0.292125  | 1  |
| 13.1 | 1 | 3 | µg | LBK | SS316   | 1.132875  | 0.306375  | 2  |
| 13.1 | 1 | 3 | µg | LBK | SS316   | 1.5675    | 0.2386875 | 3  |
| 13.1 | 1 | 3 | µg | LBK | SS316   | 0.8015625 | 0.2956875 | 4  |
| 13.1 | 1 | 3 | µg | LBK | SS316   | 0.92625   | 0.2671875 | 5  |
| 13.1 | 1 | 3 | µg | LBK | SS316   | 1.332375  | 0.220875  | 6  |
| 13.1 | 1 | 3 | µg | LBK | SS316   | 1.047375  | 0.228     | 7  |
| 13.1 | 1 | 3 | µg | LBK | SS316   | 1.2148125 | 0.3455625 | 8  |
| 13.1 | 1 | 3 | µg | LBK | SS316   | 1.3003125 | 0.292125  | 9  |
| 13.1 | 1 | 3 | µg | LBK | SS316   | 0.833625  | 0.2814375 | 10 |
| 13.1 | 1 | 3 | µg | LBK | SS316   | 0.933375  | 0.3241875 | 11 |
| 13.1 | 1 | 3 | µg | LBK | SS316   | 0.798     | 0.3241875 | 12 |
| 13.1 | 1 | 3 | µg | LBK | SS316   | 1.118625  | 0.29925   | 13 |
| 13.1 | 1 | 3 | µg | LBK | SS316   | 1.0865625 | 0.235125  | 14 |
| 13.1 | 1 | 3 | µg | LBK | SS316   | 0.976125  | 0.3705    | 15 |
| 13.1 | 1 | 3 | µg | LBK | SS316   | 0.904875  | 0.2814375 | 16 |
| 13.1 | 1 | 3 | µg | LBK | SS316   | 0.89775   | 0.2814375 | 17 |
| 13.1 | 1 | 3 | µg | LBK | SS316   | 0.9654375 | 0.3455625 | 18 |
| 13.1 | 1 | 3 | µg | LBK | SS316   | 0.9654375 | 0.29925   | 19 |
| 13.1 | 1 | 3 | µg | LBK | SS316   | 1.004625  | 0.3099375 | 20 |
| 13.1 | 1 | 3 | µg | LBK | SS316   | 1.43925   | 0.29925   | 21 |
| 13.1 | 1 | 3 | µg | LBK | SS316   | 1.2290625 | 0.32775   | 22 |
| 13.1 | 1 | 3 | µg | LBK | SS316   | 1.49625   | 0.2743125 | 23 |
| 13.1 | 1 | 3 | µg | LBK | SS316   | 1.4143125 | 0.32775   | 24 |
| 13.1 | 1 | 3 | µg | LBK | SS316   | 1.353     | 0.324     | 25 |
| 13.1 | 2 | 3 | µg | LBK | SS316   | 1.066     | 0.301     | 1  |
| 13.1 | 2 | 3 | µg | LBK | SS316   | 1.022     | 0.239     | 2  |
| 13.1 | 2 | 3 | µg | LBK | SS316   | 1.511     | 0.266     | 3  |
| 13.1 | 2 | 3 | µg | LBK | SS316   | 0.954     | 0.39      | 4  |
| 13.1 | 2 | 3 | µg | LBK | SS316   | 1.307     | 0.31      | 5  |
| 13.1 | 2 | 3 | µg | LBK | SS316   | 1.285     | 0.322     | 6  |
| 13.1 | 2 | 3 | µg | LBK | SS316   | 1.019     | 0.264     | 7  |
| 13.1 | 2 | 3 | µg | LBK | SS316   | 1.002     | 0.311     | 8  |
| 13.1 | 2 | 3 | µg | LBK | SS316   | 1.396     | 0.301     | 9  |
| 13.1 | 2 | 3 | µg | LBK | SS316   | 0.838     | 0.391     | 10 |
| 13.1 | 2 | 3 | µg | LBK | SS316   | 1.335     | 0.301     | 11 |
| 13.1 | 2 | 3 | µg | LBK | SS316   | 1.378     | 0.257     | 12 |
| 13.1 | 2 | 3 | µg | LBK | SS316   | 1.065     | 0.278     | 13 |
| 13.1 | 2 | 3 | µg | LBK | SS316   | 0.965     | 0.294     | 14 |
| 13.1 | 2 | 3 | µg | LBK | SS316   | 0.94      | 0.34      | 15 |
| 13.1 | 2 | 3 | µg | LBK | SS316   | 1.21      | 0.284     | 16 |
| 13.1 | 2 | 3 | µg | LBK | SS316   | 0.931     | 0.328     | 17 |
| 13.1 | 2 | 3 | µg | LBK | SS316   | 1.056     | 0.342     | 18 |
| 13.1 | 2 | 3 | µg | LBK | SS316   | 1.04      | 0.283     | 19 |
| 13.1 | 2 | 3 | µg | LBK | SS316   | 1.423     | 0.273     | 20 |
| 13.1 | 2 | 3 | µg | LBK | SS316   | 1.025     | 0.32      | 21 |
| 13.1 | 2 | 3 | µg | LBK | SS316   | 0.811     | 0.31      | 22 |

|      |   |   |    |     |       |       |       |    |
|------|---|---|----|-----|-------|-------|-------|----|
| 13.1 | 2 | 3 | µg | LBK | SS316 | 1.016 | 0.327 | 23 |
| 13.1 | 2 | 3 | µg | LBK | SS316 | 1.133 | 0.265 | 24 |
| 13.1 | 2 | 3 | µg | LBK | SS316 | 1.45  | 0.345 | 25 |
| 13.1 | 3 | 3 | µg | LBK | SS316 | 0.777 | 0.295 | 1  |
| 13.1 | 3 | 3 | µg | LBK | SS316 | 0.92  | 0.295 | 2  |
| 13.1 | 3 | 3 | µg | LBK | SS316 | 1.118 | 0.414 | 3  |
| 13.1 | 3 | 3 | µg | LBK | SS316 | 1.212 | 0.303 | 4  |
| 13.1 | 3 | 3 | µg | LBK | SS316 | 1.268 | 0.342 | 5  |
| 13.1 | 3 | 3 | µg | LBK | SS316 | 1.299 | 0.32  | 6  |
| 13.1 | 3 | 3 | µg | LBK | SS316 | 1.202 | 0.274 | 7  |
| 13.1 | 3 | 3 | µg | LBK | SS316 | 1.569 | 0.269 | 8  |
| 13.1 | 3 | 3 | µg | LBK | SS316 | 1.109 | 0.294 | 9  |
| 13.1 | 3 | 3 | µg | LBK | SS316 | 0.939 | 0.346 | 10 |
| 13.1 | 3 | 3 | µg | LBK | SS316 | 0.948 | 0.274 | 11 |
| 13.1 | 3 | 3 | µg | LBK | SS316 | 0.785 | 0.374 | 12 |
| 13.1 | 3 | 3 | µg | LBK | SS316 | 1.001 | 0.336 | 13 |
| 13.1 | 3 | 3 | µg | LBK | SS316 | 1.692 | 0.276 | 14 |
| 13.1 | 3 | 3 | µg | LBK | SS316 | 0.716 | 0.266 | 15 |
| 13.1 | 3 | 3 | µg | LBK | SS316 | 0.858 | 0.271 | 16 |
| 13.1 | 3 | 3 | µg | LBK | SS316 | 1.527 | 0.233 | 17 |
| 13.1 | 3 | 3 | µg | LBK | SS316 | 0.665 | 0.253 | 18 |
| 13.1 | 3 | 3 | µg | LBK | SS316 | 0.758 | 0.31  | 19 |
| 13.1 | 3 | 3 | µg | LBK | SS316 | 1.613 | 0.376 | 20 |
| 13.1 | 3 | 3 | µg | LBK | SS316 | 0.828 | 0.373 | 21 |
| 13.1 | 3 | 3 | µg | LBK | SS316 | 1.237 | 0.345 | 22 |
| 13.1 | 3 | 3 | µg | LBK | SS316 | 1.152 | 0.325 | 23 |
| 13.1 | 3 | 3 | µg | LBK | SS316 | 0.939 | 0.219 | 24 |
| 13.1 | 3 | 3 | µg | LBK | SS316 | 1.423 | 0.328 | 25 |
| 13.1 | 4 | 3 | µg | LBK | SS316 | 0.841 | 0.252 | 1  |
| 13.1 | 4 | 3 | µg | LBK | SS316 | 1.206 | 0.319 | 2  |
| 13.1 | 4 | 3 | µg | LBK | SS316 | 1.142 | 0.252 | 3  |
| 13.1 | 4 | 3 | µg | LBK | SS316 | 0.802 | 0.303 | 4  |
| 13.1 | 4 | 3 | µg | LBK | SS316 | 0.946 | 0.27  | 5  |
| 13.1 | 4 | 3 | µg | LBK | SS316 | 1.043 | 0.278 | 6  |
| 13.1 | 4 | 3 | µg | LBK | SS316 | 1.291 | 0.275 | 7  |
| 13.1 | 4 | 3 | µg | LBK | SS316 | 1.356 | 0.295 | 8  |
| 13.1 | 4 | 3 | µg | LBK | SS316 | 1.586 | 0.248 | 9  |
| 13.1 | 4 | 3 | µg | LBK | SS316 | 1.069 | 0.231 | 10 |
| 13.1 | 4 | 3 | µg | LBK | SS316 | 1.302 | 0.23  | 11 |
| 13.1 | 4 | 3 | µg | LBK | SS316 | 1.05  | 0.246 | 12 |
| 13.1 | 4 | 3 | µg | LBK | SS316 | 1.129 | 0.301 | 13 |
| 13.1 | 4 | 3 | µg | LBK | SS316 | 0.882 | 0.256 | 14 |
| 13.1 | 4 | 3 | µg | LBK | SS316 | 0.817 | 0.195 | 15 |
| 13.1 | 4 | 3 | µg | LBK | SS316 | 0.965 | 0.254 | 16 |
| 13.1 | 4 | 3 | µg | LBK | SS316 | 0.981 | 0.332 | 17 |
| 13.1 | 4 | 3 | µg | LBK | SS316 | 0.919 | 0.289 | 18 |
| 13.1 | 4 | 3 | µg | LBK | SS316 | 1.285 | 0.297 | 19 |
| 13.1 | 4 | 3 | µg | LBK | SS316 | 0.984 | 0.316 | 20 |
| 13.1 | 4 | 3 | µg | LBK | SS316 | 0.865 | 0.345 | 21 |
| 13.1 | 4 | 3 | µg | LBK | SS316 | 0.973 | 0.238 | 22 |

|      |   |   |    |     |         |       |       |    |
|------|---|---|----|-----|---------|-------|-------|----|
| 13.1 | 4 | 3 | µg | LBK | SS316   | 1.304 | 0.271 | 23 |
| 13.1 | 4 | 3 | µg | LBK | SS316   | 0.791 | 0.291 | 24 |
| 13.1 | 4 | 3 | µg | LBK | SS316   | 0.959 | 0.233 | 25 |
| 13.5 | 1 | 3 | µg | LBK | p-SS316 | 1.145 | 0.326 | 1  |
| 13.5 | 1 | 3 | µg | LBK | p-SS316 | 0.94  | 0.288 | 2  |
| 13.5 | 1 | 3 | µg | LBK | p-SS316 | 0.921 | 0.279 | 3  |
| 13.5 | 1 | 3 | µg | LBK | p-SS316 | 1.102 | 0.354 | 4  |
| 13.5 | 1 | 3 | µg | LBK | p-SS316 | 1.199 | 0.286 | 5  |
| 13.5 | 1 | 3 | µg | LBK | p-SS316 | 0.682 | 0.278 | 6  |
| 13.5 | 1 | 3 | µg | LBK | p-SS316 | 1.035 | 0.258 | 7  |
| 13.5 | 1 | 3 | µg | LBK | p-SS316 | 1.477 | 0.308 | 8  |
| 13.5 | 1 | 3 | µg | LBK | p-SS316 | 0.791 | 0.335 | 9  |
| 13.5 | 1 | 3 | µg | LBK | p-SS316 | 1     | 0.309 | 10 |
| 13.5 | 1 | 3 | µg | LBK | p-SS316 | 1.081 | 0.329 | 11 |
| 13.5 | 1 | 3 | µg | LBK | p-SS316 | 1.11  | 0.314 | 12 |
| 13.5 | 1 | 3 | µg | LBK | p-SS316 | 0.973 | 0.302 | 13 |
| 13.5 | 1 | 3 | µg | LBK | p-SS316 | 0.942 | 0.251 | 14 |
| 13.5 | 1 | 3 | µg | LBK | p-SS316 | 1.308 | 0.337 | 15 |
| 13.5 | 1 | 3 | µg | LBK | p-SS316 | 1.111 | 0.323 | 16 |
| 13.5 | 1 | 3 | µg | LBK | p-SS316 | 0.655 | 0.349 | 17 |
| 13.5 | 1 | 3 | µg | LBK | p-SS316 | 1.121 | 0.282 | 18 |
| 13.5 | 1 | 3 | µg | LBK | p-SS316 | 1.189 | 0.334 | 19 |
| 13.5 | 1 | 3 | µg | LBK | p-SS316 | 1.252 | 0.283 | 20 |
| 13.5 | 1 | 3 | µg | LBK | p-SS316 | 0.899 | 0.357 | 21 |
| 13.5 | 1 | 3 | µg | LBK | p-SS316 | 0.877 | 0.301 | 22 |
| 13.5 | 1 | 3 | µg | LBK | p-SS316 | 1.119 | 0.282 | 23 |
| 13.5 | 1 | 3 | µg | LBK | p-SS316 | 1.164 | 0.323 | 24 |
| 13.5 | 1 | 3 | µg | LBK | p-SS316 | 1.074 | 0.375 | 25 |
| 13.5 | 2 | 3 | µg | LBK | p-SS316 | 0.922 | 0.351 | 1  |
| 13.5 | 2 | 3 | µg | LBK | p-SS316 | 0.946 | 0.359 | 2  |
| 13.5 | 2 | 3 | µg | LBK | p-SS316 | 1.259 | 0.311 | 3  |
| 13.5 | 2 | 3 | µg | LBK | p-SS316 | 0.885 | 0.245 | 4  |
| 13.5 | 2 | 3 | µg | LBK | p-SS316 | 1.045 | 0.308 | 5  |
| 13.5 | 2 | 3 | µg | LBK | p-SS316 | 0.894 | 0.328 | 6  |
| 13.5 | 2 | 3 | µg | LBK | p-SS316 | 0.726 | 0.257 | 7  |
| 13.5 | 2 | 3 | µg | LBK | p-SS316 | 0.881 | 0.317 | 8  |
| 13.5 | 2 | 3 | µg | LBK | p-SS316 | 1.157 | 0.348 | 9  |
| 13.5 | 2 | 3 | µg | LBK | p-SS316 | 1.223 | 0.301 | 10 |
| 13.5 | 2 | 3 | µg | LBK | p-SS316 | 0.835 | 0.347 | 11 |
| 13.5 | 2 | 3 | µg | LBK | p-SS316 | 1.053 | 0.381 | 12 |
| 13.5 | 2 | 3 | µg | LBK | p-SS316 | 1.277 | 0.373 | 13 |
| 13.5 | 2 | 3 | µg | LBK | p-SS316 | 1.203 | 0.286 | 14 |
| 13.5 | 2 | 3 | µg | LBK | p-SS316 | 0.846 | 0.376 | 15 |
| 13.5 | 2 | 3 | µg | LBK | p-SS316 | 0.77  | 0.262 | 16 |
| 13.5 | 2 | 3 | µg | LBK | p-SS316 | 0.713 | 0.297 | 17 |
| 13.5 | 2 | 3 | µg | LBK | p-SS316 | 0.959 | 0.358 | 18 |
| 13.5 | 2 | 3 | µg | LBK | p-SS316 | 0.886 | 0.292 | 19 |
| 13.5 | 2 | 3 | µg | LBK | p-SS316 | 0.756 | 0.383 | 20 |
| 13.5 | 2 | 3 | µg | LBK | p-SS316 | 1.424 | 0.342 | 21 |
| 13.5 | 2 | 3 | µg | LBK | p-SS316 | 0.996 | 0.274 | 22 |

|      |   |   |    |     |         |       |       |    |
|------|---|---|----|-----|---------|-------|-------|----|
| 13.5 | 2 | 3 | µg | LBK | p-SS316 | 0.928 | 0.325 | 23 |
| 13.5 | 2 | 3 | µg | LBK | p-SS316 | 0.872 | 0.291 | 24 |
| 13.5 | 2 | 3 | µg | LBK | p-SS316 | 0.804 | 0.32  | 25 |
| 13.5 | 3 | 3 | µg | LBK | p-SS316 | 1.175 | 0.335 | 1  |
| 13.5 | 3 | 3 | µg | LBK | p-SS316 | 0.854 | 0.328 | 2  |
| 13.5 | 3 | 3 | µg | LBK | p-SS316 | 0.848 | 0.348 | 3  |
| 13.5 | 3 | 3 | µg | LBK | p-SS316 | 0.921 | 0.287 | 4  |
| 13.5 | 3 | 3 | µg | LBK | p-SS316 | 0.969 | 0.321 | 5  |
| 13.5 | 3 | 3 | µg | LBK | p-SS316 | 1.354 | 0.27  | 6  |
| 13.5 | 3 | 3 | µg | LBK | p-SS316 | 0.914 | 0.295 | 7  |
| 13.5 | 3 | 3 | µg | LBK | p-SS316 | 0.919 | 0.338 | 8  |
| 13.5 | 3 | 3 | µg | LBK | p-SS316 | 1.161 | 0.261 | 9  |
| 13.5 | 3 | 3 | µg | LBK | p-SS316 | 1.174 | 0.341 | 10 |
| 13.5 | 3 | 3 | µg | LBK | p-SS316 | 1.14  | 0.341 | 11 |
| 13.5 | 3 | 3 | µg | LBK | p-SS316 | 0.993 | 0.282 | 12 |
| 13.5 | 3 | 3 | µg | LBK | p-SS316 | 0.983 | 0.278 | 13 |
| 13.5 | 3 | 3 | µg | LBK | p-SS316 | 0.897 | 0.291 | 14 |
| 13.5 | 3 | 3 | µg | LBK | p-SS316 | 1.097 | 0.277 | 15 |
| 13.5 | 3 | 3 | µg | LBK | p-SS316 | 1.028 | 0.359 | 16 |
| 13.5 | 3 | 3 | µg | LBK | p-SS316 | 1.34  | 0.333 | 17 |
| 13.5 | 3 | 3 | µg | LBK | p-SS316 | 1.626 | 0.293 | 18 |
| 13.5 | 3 | 3 | µg | LBK | p-SS316 | 0.77  | 0.321 | 19 |
| 13.5 | 3 | 3 | µg | LBK | p-SS316 | 1.583 | 0.339 | 20 |
| 13.5 | 3 | 3 | µg | LBK | p-SS316 | 1.166 | 0.357 | 21 |
| 13.5 | 3 | 3 | µg | LBK | p-SS316 | 1.354 | 0.336 | 22 |
| 13.5 | 3 | 3 | µg | LBK | p-SS316 | 1.165 | 0.333 | 23 |
| 13.5 | 3 | 3 | µg | LBK | p-SS316 | 1.246 | 0.33  | 24 |
| 13.5 | 3 | 3 | µg | LBK | p-SS316 | 1.34  | 0.311 | 25 |
| 13.5 | 4 | 3 | µg | LBK | p-SS316 | 1.514 | 0.287 | 1  |
| 13.5 | 4 | 3 | µg | LBK | p-SS316 | 1.228 | 0.336 | 2  |
| 13.5 | 4 | 3 | µg | LBK | p-SS316 | 1.198 | 0.31  | 3  |
| 13.5 | 4 | 3 | µg | LBK | p-SS316 | 1.73  | 0.349 | 4  |
| 13.5 | 4 | 3 | µg | LBK | p-SS316 | 1.431 | 0.293 | 5  |
| 13.5 | 4 | 3 | µg | LBK | p-SS316 | 1.083 | 0.34  | 6  |
| 13.5 | 4 | 3 | µg | LBK | p-SS316 | 1.639 | 0.332 | 7  |
| 13.5 | 4 | 3 | µg | LBK | p-SS316 | 0.785 | 0.261 | 8  |
| 13.5 | 4 | 3 | µg | LBK | p-SS316 | 0.828 | 0.311 | 9  |
| 13.5 | 4 | 3 | µg | LBK | p-SS316 | 1.745 | 0.307 | 10 |
| 13.5 | 4 | 3 | µg | LBK | p-SS316 | 1.416 | 0.308 | 11 |
| 13.5 | 4 | 3 | µg | LBK | p-SS316 | 1.205 | 0.29  | 12 |
| 13.5 | 4 | 3 | µg | LBK | p-SS316 | 0.918 | 0.31  | 13 |
| 13.5 | 4 | 3 | µg | LBK | p-SS316 | 1.063 | 0.339 | 14 |
| 13.5 | 4 | 3 | µg | LBK | p-SS316 | 1.148 | 0.376 | 15 |
| 13.5 | 4 | 3 | µg | LBK | p-SS316 | 1.058 | 0.349 | 16 |
| 13.5 | 4 | 3 | µg | LBK | p-SS316 | 0.991 | 0.277 | 17 |
| 13.5 | 4 | 3 | µg | LBK | p-SS316 | 1.366 | 0.357 | 18 |
| 13.5 | 4 | 3 | µg | LBK | p-SS316 | 1.641 | 0.369 | 19 |
| 13.5 | 4 | 3 | µg | LBK | p-SS316 | 1.264 | 0.397 | 20 |
| 13.5 | 4 | 3 | µg | LBK | p-SS316 | 1.053 | 0.369 | 21 |
| 13.5 | 4 | 3 | µg | LBK | p-SS316 | 1.189 | 0.407 | 22 |

|      |   |   |    |     |         |       |       |    |
|------|---|---|----|-----|---------|-------|-------|----|
| 13.5 | 4 | 3 | µg | LBK | p-SS316 | 0.79  | 0.358 | 23 |
| 13.5 | 4 | 3 | µg | LBK | p-SS316 | 0.747 | 0.323 | 24 |
| 13.5 | 4 | 3 | µg | LBK | p-SS316 | 1.343 | 0.319 | 25 |
| 14.1 | 1 | 3 | µg | LBK | MIT-LIS | 1.346 | 0.335 | 1  |
| 14.1 | 1 | 3 | µg | LBK | MIT-LIS | 1.427 | 0.308 | 2  |
| 14.1 | 1 | 3 | µg | LBK | MIT-LIS | 0.756 | 0.292 | 3  |
| 14.1 | 1 | 3 | µg | LBK | MIT-LIS | 1.243 | 0.266 | 4  |
| 14.1 | 1 | 3 | µg | LBK | MIT-LIS | 1.339 | 0.298 | 5  |
| 14.1 | 1 | 3 | µg | LBK | MIT-LIS | 0.968 | 0.323 | 6  |
| 14.1 | 1 | 3 | µg | LBK | MIT-LIS | 1.103 | 0.323 | 7  |
| 14.1 | 1 | 3 | µg | LBK | MIT-LIS | 1.014 | 0.332 | 8  |
| 14.1 | 1 | 3 | µg | LBK | MIT-LIS | 0.881 | 0.332 | 9  |
| 14.1 | 1 | 3 | µg | LBK | MIT-LIS | 0.992 | 0.367 | 10 |
| 14.1 | 1 | 3 | µg | LBK | MIT-LIS | 0.854 | 0.269 | 11 |
| 14.1 | 1 | 3 | µg | LBK | MIT-LIS | 0.77  | 0.325 | 12 |
| 14.1 | 1 | 3 | µg | LBK | MIT-LIS | 0.62  | 0.298 | 13 |
| 14.1 | 1 | 3 | µg | LBK | MIT-LIS | 0.939 | 0.283 | 14 |
| 14.1 | 1 | 3 | µg | LBK | MIT-LIS | 0.836 | 0.295 | 15 |
| 14.1 | 1 | 3 | µg | LBK | MIT-LIS | 1.152 | 0.366 | 16 |
| 14.1 | 1 | 3 | µg | LBK | MIT-LIS | 0.814 | 0.307 | 17 |
| 14.1 | 1 | 3 | µg | LBK | MIT-LIS | 1.365 | 0.28  | 18 |
| 14.1 | 1 | 3 | µg | LBK | MIT-LIS | 1.052 | 0.343 | 19 |
| 14.1 | 1 | 3 | µg | LBK | MIT-LIS | 0.851 | 0.315 | 20 |
| 14.1 | 1 | 3 | µg | LBK | MIT-LIS | 1.028 | 0.361 | 21 |
| 14.1 | 1 | 3 | µg | LBK | MIT-LIS | 1.427 | 0.355 | 22 |
| 14.1 | 1 | 3 | µg | LBK | MIT-LIS | 1.156 | 0.355 | 23 |
| 14.1 | 1 | 3 | µg | LBK | MIT-LIS | 1.736 | 0.253 | 24 |
| 14.1 | 1 | 3 | µg | LBK | MIT-LIS | 1.243 | 0.308 | 25 |
| 14.1 | 2 | 3 | µg | LBK | MIT-LIS | 1.463 | 0.307 | 1  |
| 14.1 | 2 | 3 | µg | LBK | MIT-LIS | 1.035 | 0.333 | 2  |
| 14.1 | 2 | 3 | µg | LBK | MIT-LIS | 1.062 | 0.296 | 3  |
| 14.1 | 2 | 3 | µg | LBK | MIT-LIS | 1.123 | 0.313 | 4  |
| 14.1 | 2 | 3 | µg | LBK | MIT-LIS | 0.915 | 0.324 | 5  |
| 14.1 | 2 | 3 | µg | LBK | MIT-LIS | 1.556 | 0.317 | 6  |
| 14.1 | 2 | 3 | µg | LBK | MIT-LIS | 0.654 | 0.358 | 7  |
| 14.1 | 2 | 3 | µg | LBK | MIT-LIS | 1.008 | 0.315 | 8  |
| 14.1 | 2 | 3 | µg | LBK | MIT-LIS | 0.955 | 0.35  | 9  |
| 14.1 | 2 | 3 | µg | LBK | MIT-LIS | 1.024 | 0.303 | 10 |
| 14.1 | 2 | 3 | µg | LBK | MIT-LIS | 0.821 | 0.324 | 11 |
| 14.1 | 2 | 3 | µg | LBK | MIT-LIS | 1.829 | 0.325 | 12 |
| 14.1 | 2 | 3 | µg | LBK | MIT-LIS | 1.209 | 0.296 | 13 |
| 14.1 | 2 | 3 | µg | LBK | MIT-LIS | 1.245 | 0.327 | 14 |
| 14.1 | 2 | 3 | µg | LBK | MIT-LIS | 1.917 | 0.336 | 15 |
| 14.1 | 2 | 3 | µg | LBK | MIT-LIS | 0.988 | 0.27  | 16 |
| 14.1 | 2 | 3 | µg | LBK | MIT-LIS | 1.184 | 0.325 | 17 |
| 14.1 | 2 | 3 | µg | LBK | MIT-LIS | 1.415 | 0.342 | 18 |
| 14.1 | 2 | 3 | µg | LBK | MIT-LIS | 0.926 | 0.301 | 19 |
| 14.1 | 2 | 3 | µg | LBK | MIT-LIS | 1.277 | 0.278 | 20 |
| 14.1 | 2 | 3 | µg | LBK | MIT-LIS | 0.818 | 0.33  | 21 |
| 14.1 | 2 | 3 | µg | LBK | MIT-LIS | 0.833 | 0.26  | 22 |

|      |   |   |    |     |         |       |       |    |
|------|---|---|----|-----|---------|-------|-------|----|
| 14.1 | 2 | 3 | µg | LBK | MIT-LIS | 0.604 | 0.317 | 23 |
| 14.1 | 2 | 3 | µg | LBK | MIT-LIS | 1.16  | 0.29  | 24 |
| 14.1 | 2 | 3 | µg | LBK | MIT-LIS | 1.049 | 0.316 | 25 |
| 14.1 | 3 | 3 | µg | LBK | MIT-LIS | 0.781 | 0.309 | 1  |
| 14.1 | 3 | 3 | µg | LBK | MIT-LIS | 0.823 | 0.323 | 2  |
| 14.1 | 3 | 3 | µg | LBK | MIT-LIS | 1.042 | 0.327 | 3  |
| 14.1 | 3 | 3 | µg | LBK | MIT-LIS | 0.839 | 0.358 | 4  |
| 14.1 | 3 | 3 | µg | LBK | MIT-LIS | 0.592 | 0.377 | 5  |
| 14.1 | 3 | 3 | µg | LBK | MIT-LIS | 1.221 | 0.379 | 6  |
| 14.1 | 3 | 3 | µg | LBK | MIT-LIS | 0.904 | 0.309 | 7  |
| 14.1 | 3 | 3 | µg | LBK | MIT-LIS | 0.888 | 0.242 | 8  |
| 14.1 | 3 | 3 | µg | LBK | MIT-LIS | 0.639 | 0.301 | 9  |
| 14.1 | 3 | 3 | µg | LBK | MIT-LIS | 0.561 | 0.31  | 10 |
| 14.1 | 3 | 3 | µg | LBK | MIT-LIS | 1.335 | 0.304 | 11 |
| 14.1 | 3 | 3 | µg | LBK | MIT-LIS | 1.227 | 0.321 | 12 |
| 14.1 | 3 | 3 | µg | LBK | MIT-LIS | 1.622 | 0.363 | 13 |
| 14.1 | 3 | 3 | µg | LBK | MIT-LIS | 0.819 | 0.314 | 14 |
| 14.1 | 3 | 3 | µg | LBK | MIT-LIS | 1.06  | 0.336 | 15 |
| 14.1 | 3 | 3 | µg | LBK | MIT-LIS | 1.618 | 0.24  | 16 |
| 14.1 | 3 | 3 | µg | LBK | MIT-LIS | 1.124 | 0.309 | 17 |
| 14.1 | 3 | 3 | µg | LBK | MIT-LIS | 0.942 | 0.308 | 18 |
| 14.1 | 3 | 3 | µg | LBK | MIT-LIS | 1.144 | 0.323 | 19 |
| 14.1 | 3 | 3 | µg | LBK | MIT-LIS | 1.201 | 0.287 | 20 |
| 14.1 | 3 | 3 | µg | LBK | MIT-LIS | 1.078 | 0.304 | 21 |
| 14.1 | 3 | 3 | µg | LBK | MIT-LIS | 1.323 | 0.323 | 22 |
| 14.1 | 3 | 3 | µg | LBK | MIT-LIS | 1.332 | 0.417 | 23 |
| 14.1 | 3 | 3 | µg | LBK | MIT-LIS | 0.97  | 0.361 | 24 |
| 14.1 | 3 | 3 | µg | LBK | MIT-LIS | 0.885 | 0.373 | 25 |
| 14.1 | 4 | 3 | µg | LBK | MIT-LIS | 1.176 | 0.296 | 1  |
| 14.1 | 4 | 3 | µg | LBK | MIT-LIS | 1.141 | 0.269 | 2  |
| 14.1 | 4 | 3 | µg | LBK | MIT-LIS | 1.09  | 0.244 | 3  |
| 14.1 | 4 | 3 | µg | LBK | MIT-LIS | 0.827 | 0.24  | 4  |
| 14.1 | 4 | 3 | µg | LBK | MIT-LIS | 0.939 | 0.274 | 5  |
| 14.1 | 4 | 3 | µg | LBK | MIT-LIS | 1.015 | 0.244 | 6  |
| 14.1 | 4 | 3 | µg | LBK | MIT-LIS | 1.145 | 0.257 | 7  |
| 14.1 | 4 | 3 | µg | LBK | MIT-LIS | 1.274 | 0.241 | 8  |
| 14.1 | 4 | 3 | µg | LBK | MIT-LIS | 0.75  | 0.314 | 9  |
| 14.1 | 4 | 3 | µg | LBK | MIT-LIS | 1.152 | 0.338 | 10 |
| 14.1 | 4 | 3 | µg | LBK | MIT-LIS | 1.207 | 0.261 | 11 |
| 14.1 | 4 | 3 | µg | LBK | MIT-LIS | 0.828 | 0.317 | 12 |
| 14.1 | 4 | 3 | µg | LBK | MIT-LIS | 1.373 | 0.22  | 13 |
| 14.1 | 4 | 3 | µg | LBK | MIT-LIS | 0.961 | 0.235 | 14 |
| 14.1 | 4 | 3 | µg | LBK | MIT-LIS | 1.206 | 0.295 | 15 |
| 14.1 | 4 | 3 | µg | LBK | MIT-LIS | 0.85  | 0.289 | 16 |
| 14.1 | 4 | 3 | µg | LBK | MIT-LIS | 1.472 | 0.287 | 17 |
| 14.1 | 4 | 3 | µg | LBK | MIT-LIS | 0.799 | 0.285 | 18 |
| 14.1 | 4 | 3 | µg | LBK | MIT-LIS | 0.95  | 0.355 | 19 |
| 14.1 | 4 | 3 | µg | LBK | MIT-LIS | 1.384 | 0.336 | 20 |
| 14.1 | 4 | 3 | µg | LBK | MIT-LIS | 1.03  | 0.235 | 21 |
| 14.1 | 4 | 3 | µg | LBK | MIT-LIS | 0.934 | 0.325 | 22 |

|      |   |   |     |      |                    |       |       |    |
|------|---|---|-----|------|--------------------|-------|-------|----|
| 14.1 | 4 | 3 | µg  | LBK  | MIT-LIS            | 0.925 | 0.269 | 23 |
| 14.1 | 4 | 3 | µg  | LBK  | MIT-LIS            | 0.622 | 0.26  | 24 |
| 14.1 | 4 | 3 | µg  | LBK  | MIT-LIS            | 1.024 | 0.323 | 25 |
| G2.5 | 1 | 1 | 1 g | mAUM | Cellulose Membrane | 0.877 | 0.371 | 1  |
| G2.5 | 1 | 1 | 1 g | mAUM | Cellulose Membrane | 0.852 | 0.308 | 2  |
| G2.5 | 1 | 1 | 1 g | mAUM | Cellulose Membrane | 0.712 | 0.321 | 3  |
| G2.5 | 1 | 1 | 1 g | mAUM | Cellulose Membrane | 0.723 | 0.329 | 4  |
| G2.5 | 1 | 1 | 1 g | mAUM | Cellulose Membrane | 0.739 | 0.375 | 5  |
| G2.5 | 1 | 1 | 1 g | mAUM | Cellulose Membrane | 1.439 | 0.337 | 6  |
| G2.5 | 1 | 1 | 1 g | mAUM | Cellulose Membrane | 0.743 | 0.292 | 7  |
| G2.5 | 1 | 1 | 1 g | mAUM | Cellulose Membrane | 1.231 | 0.348 | 8  |
| G2.5 | 1 | 1 | 1 g | mAUM | Cellulose Membrane | 0.799 | 0.271 | 9  |
| G2.5 | 1 | 1 | 1 g | mAUM | Cellulose Membrane | 1.002 | 0.308 | 10 |
| G2.5 | 1 | 1 | 1 g | mAUM | Cellulose Membrane | 0.886 | 0.287 | 11 |
| G2.5 | 1 | 1 | 1 g | mAUM | Cellulose Membrane | 0.861 | 0.347 | 12 |
| G2.5 | 1 | 1 | 1 g | mAUM | Cellulose Membrane | 0.978 | 0.297 | 13 |
| G2.5 | 1 | 1 | 1 g | mAUM | Cellulose Membrane | 1.026 | 0.287 | 14 |
| G2.5 | 1 | 1 | 1 g | mAUM | Cellulose Membrane | 0.511 | 0.312 | 15 |
| G2.5 | 1 | 1 | 1 g | mAUM | Cellulose Membrane | 0.547 | 0.385 | 16 |
| G2.5 | 1 | 1 | 1 g | mAUM | Cellulose Membrane | 0.64  | 0.279 | 17 |
| G2.5 | 1 | 1 | 1 g | mAUM | Cellulose Membrane | 0.798 | 0.368 | 18 |
| G2.5 | 1 | 1 | 1 g | mAUM | Cellulose Membrane | 0.901 | 0.331 | 19 |
| G2.5 | 1 | 1 | 1 g | mAUM | Cellulose Membrane | 1.162 | 0.289 | 20 |
| G2.5 | 1 | 1 | 1 g | mAUM | Cellulose Membrane | 0.74  | 0.305 | 21 |
| G2.5 | 1 | 1 | 1 g | mAUM | Cellulose Membrane | 0.586 | 0.375 | 22 |
| G2.5 | 1 | 1 | 1 g | mAUM | Cellulose Membrane | 0.764 | 0.329 | 23 |

|      |   |   |     |      |                    |       |       |    |
|------|---|---|-----|------|--------------------|-------|-------|----|
| G2.5 | 1 | 1 | 1 g | mAUM | Cellulose Membrane | 0.754 | 0.408 | 24 |
| G2.5 | 1 | 1 | 1 g | mAUM | Cellulose Membrane | 0.704 | 0.288 | 25 |
| G2.6 | 2 | 1 | 1 g | mAUM | Cellulose Membrane | 0.692 | 0.363 | 1  |
| G2.6 | 2 | 1 | 1 g | mAUM | Cellulose Membrane | 0.607 | 0.396 | 2  |
| G2.6 | 2 | 1 | 1 g | mAUM | Cellulose Membrane | 0.766 | 0.38  | 3  |
| G2.6 | 2 | 1 | 1 g | mAUM | Cellulose Membrane | 0.712 | 0.387 | 4  |
| G2.6 | 2 | 1 | 1 g | mAUM | Cellulose Membrane | 0.809 | 0.282 | 5  |
| G2.6 | 2 | 1 | 1 g | mAUM | Cellulose Membrane | 0.91  | 0.363 | 6  |
| G2.6 | 2 | 1 | 1 g | mAUM | Cellulose Membrane | 0.746 | 0.385 | 7  |
| G2.6 | 2 | 1 | 1 g | mAUM | Cellulose Membrane | 0.856 | 0.317 | 8  |
| G2.6 | 2 | 1 | 1 g | mAUM | Cellulose Membrane | 0.964 | 0.332 | 9  |
| G2.6 | 2 | 1 | 1 g | mAUM | Cellulose Membrane | 0.95  | 0.377 | 10 |
| G2.6 | 2 | 1 | 1 g | mAUM | Cellulose Membrane | 0.747 | 0.378 | 11 |
| G2.6 | 2 | 1 | 1 g | mAUM | Cellulose Membrane | 1.107 | 0.261 | 12 |
| G2.6 | 2 | 1 | 1 g | mAUM | Cellulose Membrane | 0.859 | 0.316 | 13 |
| G2.6 | 2 | 1 | 1 g | mAUM | Cellulose Membrane | 0.855 | 0.328 | 14 |
| G2.6 | 2 | 1 | 1 g | mAUM | Cellulose Membrane | 0.751 | 0.398 | 15 |
| G2.6 | 2 | 1 | 1 g | mAUM | Cellulose Membrane | 1.036 | 0.322 | 16 |
| G2.6 | 2 | 1 | 1 g | mAUM | Cellulose Membrane | 0.822 | 0.294 | 17 |
| G2.6 | 2 | 1 | 1 g | mAUM | Cellulose Membrane | 0.766 | 0.362 | 18 |
| G2.6 | 2 | 1 | 1 g | mAUM | Cellulose Membrane | 0.994 | 0.343 | 19 |
| G2.6 | 2 | 1 | 1 g | mAUM | Cellulose Membrane | 0.782 | 0.328 | 20 |
| G2.6 | 2 | 1 | 1 g | mAUM | Cellulose Membrane | 0.707 | 0.314 | 21 |
| G2.6 | 2 | 1 | 1 g | mAUM | Cellulose Membrane | 1.049 | 0.381 | 22 |
| G2.6 | 2 | 1 | 1 g | mAUM | Cellulose Membrane | 0.751 | 0.375 | 23 |

|      |   |   |     |      |                    |       |       |    |
|------|---|---|-----|------|--------------------|-------|-------|----|
| G2.6 | 2 | 1 | 1 g | mAUM | Cellulose Membrane | 0.846 | 0.353 | 24 |
| G2.6 | 2 | 1 | 1 g | mAUM | Cellulose Membrane | 1.102 | 0.336 | 25 |
| G2.7 | 3 | 1 | 1 g | mAUM | Cellulose Membrane | 0.871 | 0.372 | 1  |
| G2.7 | 3 | 1 | 1 g | mAUM | Cellulose Membrane | 0.78  | 0.353 | 2  |
| G2.7 | 3 | 1 | 1 g | mAUM | Cellulose Membrane | 0.903 | 0.318 | 3  |
| G2.7 | 3 | 1 | 1 g | mAUM | Cellulose Membrane | 0.945 | 0.283 | 4  |
| G2.7 | 3 | 1 | 1 g | mAUM | Cellulose Membrane | 0.935 | 0.309 | 5  |
| G2.7 | 3 | 1 | 1 g | mAUM | Cellulose Membrane | 0.979 | 0.396 | 6  |
| G2.7 | 3 | 1 | 1 g | mAUM | Cellulose Membrane | 0.788 | 0.365 | 7  |
| G2.7 | 3 | 1 | 1 g | mAUM | Cellulose Membrane | 0.89  | 0.317 | 8  |
| G2.7 | 3 | 1 | 1 g | mAUM | Cellulose Membrane | 0.827 | 0.361 | 9  |
| G2.7 | 3 | 1 | 1 g | mAUM | Cellulose Membrane | 0.748 | 0.342 | 10 |
| G2.7 | 3 | 1 | 1 g | mAUM | Cellulose Membrane | 0.77  | 0.288 | 11 |
| G2.7 | 3 | 1 | 1 g | mAUM | Cellulose Membrane | 0.88  | 0.321 | 12 |
| G2.7 | 3 | 1 | 1 g | mAUM | Cellulose Membrane | 0.65  | 0.292 | 13 |
| G2.7 | 3 | 1 | 1 g | mAUM | Cellulose Membrane | 0.963 | 0.233 | 14 |
| G2.7 | 3 | 1 | 1 g | mAUM | Cellulose Membrane | 0.766 | 0.362 | 15 |
| G2.7 | 3 | 1 | 1 g | mAUM | Cellulose Membrane | 0.788 | 0.274 | 16 |
| G2.7 | 3 | 1 | 1 g | mAUM | Cellulose Membrane | 0.934 | 0.3   | 17 |
| G2.7 | 3 | 1 | 1 g | mAUM | Cellulose Membrane | 0.935 | 0.353 | 18 |
| G2.7 | 3 | 1 | 1 g | mAUM | Cellulose Membrane | 0.958 | 0.369 | 19 |
| G2.7 | 3 | 1 | 1 g | mAUM | Cellulose Membrane | 0.922 | 0.378 | 20 |
| G2.7 | 3 | 1 | 1 g | mAUM | Cellulose Membrane | 0.812 | 0.314 | 21 |
| G2.7 | 3 | 1 | 1 g | mAUM | Cellulose Membrane | 0.969 | 0.351 | 22 |
| G2.7 | 3 | 1 | 1 g | mAUM | Cellulose Membrane | 1.008 | 0.276 | 23 |

|      |   |   |     |      |                    |       |       |    |
|------|---|---|-----|------|--------------------|-------|-------|----|
| G2.7 | 3 | 1 | 1 g | mAUM | Cellulose Membrane | 0.781 | 0.292 | 24 |
| G2.7 | 3 | 1 | 1 g | mAUM | Cellulose Membrane | 0.773 | 0.286 | 25 |
| G2.8 | 4 | 1 | 1 g | mAUM | Cellulose Membrane | 0.8   | 0.311 | 1  |
| G2.8 | 4 | 1 | 1 g | mAUM | Cellulose Membrane | 0.909 | 0.376 | 2  |
| G2.8 | 4 | 1 | 1 g | mAUM | Cellulose Membrane | 0.742 | 0.368 | 3  |
| G2.8 | 4 | 1 | 1 g | mAUM | Cellulose Membrane | 1.12  | 0.302 | 4  |
| G2.8 | 4 | 1 | 1 g | mAUM | Cellulose Membrane | 0.774 | 0.342 | 5  |
| G2.8 | 4 | 1 | 1 g | mAUM | Cellulose Membrane | 1.016 | 0.384 | 6  |
| G2.8 | 4 | 1 | 1 g | mAUM | Cellulose Membrane | 0.922 | 0.287 | 7  |
| G2.8 | 4 | 1 | 1 g | mAUM | Cellulose Membrane | 0.791 | 0.308 | 8  |
| G2.8 | 4 | 1 | 1 g | mAUM | Cellulose Membrane | 0.99  | 0.346 | 9  |
| G2.8 | 4 | 1 | 1 g | mAUM | Cellulose Membrane | 0.833 | 0.339 | 10 |
| G2.8 | 4 | 1 | 1 g | mAUM | Cellulose Membrane | 1.022 | 0.302 | 11 |
| G2.8 | 4 | 1 | 1 g | mAUM | Cellulose Membrane | 0.92  | 0.351 | 12 |
| G2.8 | 4 | 1 | 1 g | mAUM | Cellulose Membrane | 0.941 | 0.315 | 13 |
| G2.8 | 4 | 1 | 1 g | mAUM | Cellulose Membrane | 0.903 | 0.325 | 14 |
| G2.8 | 4 | 1 | 1 g | mAUM | Cellulose Membrane | 0.875 | 0.282 | 15 |
| G2.8 | 4 | 1 | 1 g | mAUM | Cellulose Membrane | 0.946 | 0.255 | 16 |
| G2.8 | 4 | 1 | 1 g | mAUM | Cellulose Membrane | 0.669 | 0.372 | 17 |
| G2.8 | 4 | 1 | 1 g | mAUM | Cellulose Membrane | 0.773 | 0.292 | 18 |
| G2.8 | 4 | 1 | 1 g | mAUM | Cellulose Membrane | 0.998 | 0.252 | 19 |
| G2.8 | 4 | 1 | 1 g | mAUM | Cellulose Membrane | 0.714 | 0.289 | 20 |
| G2.8 | 4 | 1 | 1 g | mAUM | Cellulose Membrane | 0.937 | 0.39  | 21 |
| G2.8 | 4 | 1 | 1 g | mAUM | Cellulose Membrane | 0.855 | 0.427 | 22 |
| G2.8 | 4 | 1 | 1 g | mAUM | Cellulose Membrane | 0.788 | 0.355 | 23 |

|      |   |   |     |      |                    |       |       |    |
|------|---|---|-----|------|--------------------|-------|-------|----|
| G2.8 | 4 | 1 | 1 g | mAUM | Cellulose Membrane | 0.688 | 0.308 | 24 |
| G2.8 | 4 | 1 | 1 g | mAUM | Cellulose Membrane | 0.869 | 0.329 | 25 |
| G3.1 | 1 | 1 | 1 g | mAUM | Silicone           | 1.189 | 0.625 | 1  |
| G3.1 | 1 | 1 | 1 g | mAUM | Silicone           | 1.05  | 0.488 | 2  |
| G3.1 | 1 | 1 | 1 g | mAUM | Silicone           | 1.065 | 0.5   | 3  |
| G3.1 | 1 | 1 | 1 g | mAUM | Silicone           | 1.24  | 0.52  | 4  |
| G3.1 | 1 | 1 | 1 g | mAUM | Silicone           | 1.434 | 0.574 | 5  |
| G3.1 | 1 | 1 | 1 g | mAUM | Silicone           | 1.363 | 0.481 | 6  |
| G3.1 | 1 | 1 | 1 g | mAUM | Silicone           | 1.181 | 0.481 | 7  |
| G3.1 | 1 | 1 | 1 g | mAUM | Silicone           | 1.222 | 0.487 | 8  |
| G3.1 | 1 | 1 | 1 g | mAUM | Silicone           | 1.104 | 0.526 | 9  |
| G3.1 | 1 | 1 | 1 g | mAUM | Silicone           | 1.125 | 0.573 | 10 |
| G3.1 | 1 | 1 | 1 g | mAUM | Silicone           | 1.414 | 0.561 | 11 |
| G3.1 | 1 | 1 | 1 g | mAUM | Silicone           | 1.37  | 0.566 | 12 |
| G3.1 | 1 | 1 | 1 g | mAUM | Silicone           | 1     | 0.453 | 13 |
| G3.1 | 1 | 1 | 1 g | mAUM | Silicone           | 1.265 | 0.518 | 14 |
| G3.1 | 1 | 1 | 1 g | mAUM | Silicone           | 1.903 | 0.496 | 15 |
| G3.1 | 1 | 1 | 1 g | mAUM | Silicone           | 1.622 | 0.434 | 16 |
| G3.1 | 1 | 1 | 1 g | mAUM | Silicone           | 1.684 | 0.566 | 17 |
| G3.1 | 1 | 1 | 1 g | mAUM | Silicone           | 1.88  | 0.434 | 18 |
| G3.1 | 1 | 1 | 1 g | mAUM | Silicone           | 1.276 | 0.459 | 19 |
| G3.1 | 1 | 1 | 1 g | mAUM | Silicone           | 1.501 | 0.55  | 20 |
| G3.1 | 1 | 1 | 1 g | mAUM | Silicone           | 0.902 | 0.555 | 21 |
| G3.1 | 1 | 1 | 1 g | mAUM | Silicone           | 1.241 | 0.481 | 22 |
| G3.1 | 1 | 1 | 1 g | mAUM | Silicone           | 1.281 | 0.544 | 23 |
| G3.1 | 1 | 1 | 1 g | mAUM | Silicone           | 1.339 | 0.55  | 24 |
| G3.1 | 1 | 1 | 1 g | mAUM | Silicone           | 1.158 | 0.503 | 25 |
| G3.2 | 2 | 1 | 1 g | mAUM | Silicone           | 1.165 | 0.544 | 1  |
| G3.2 | 2 | 1 | 1 g | mAUM | Silicone           | 0.951 | 0.412 | 2  |
| G3.2 | 2 | 1 | 1 g | mAUM | Silicone           | 1.414 | 0.48  | 3  |
| G3.2 | 2 | 1 | 1 g | mAUM | Silicone           | 1.512 | 0.466 | 4  |
| G3.2 | 2 | 1 | 1 g | mAUM | Silicone           | 1.349 | 0.482 | 5  |
| G3.2 | 2 | 1 | 1 g | mAUM | Silicone           | 1.362 | 0.456 | 6  |
| G3.2 | 2 | 1 | 1 g | mAUM | Silicone           | 1.2   | 0.454 | 7  |
| G3.2 | 2 | 1 | 1 g | mAUM | Silicone           | 1.686 | 0.483 | 8  |
| G3.2 | 2 | 1 | 1 g | mAUM | Silicone           | 1.325 | 0.369 | 9  |
| G3.2 | 2 | 1 | 1 g | mAUM | Silicone           | 1.432 | 0.509 | 10 |
| G3.2 | 2 | 1 | 1 g | mAUM | Silicone           | 0.967 | 0.412 | 11 |
| G3.2 | 2 | 1 | 1 g | mAUM | Silicone           | 1.6   | 0.427 | 12 |
| G3.2 | 2 | 1 | 1 g | mAUM | Silicone           | 1.642 | 0.52  | 13 |
| G3.2 | 2 | 1 | 1 g | mAUM | Silicone           | 1.05  | 0.509 | 14 |
| G3.2 | 2 | 1 | 1 g | mAUM | Silicone           | 1.616 | 0.4   | 15 |
| G3.2 | 2 | 1 | 1 g | mAUM | Silicone           | 1.216 | 0.396 | 16 |
| G3.2 | 2 | 1 | 1 g | mAUM | Silicone           | 1.291 | 0.434 | 17 |
| G3.2 | 2 | 1 | 1 g | mAUM | Silicone           | 0.933 | 0.482 | 18 |
| G3.2 | 2 | 1 | 1 g | mAUM | Silicone           | 1.287 | 0.573 | 19 |
| G3.2 | 2 | 1 | 1 g | mAUM | Silicone           | 1.34  | 0.492 | 20 |
| G3.2 | 2 | 1 | 1 g | mAUM | Silicone           | 1.444 | 0.453 | 21 |

|      |   |   |     |      |          |       |       |    |
|------|---|---|-----|------|----------|-------|-------|----|
| G3.2 | 2 | 1 | 1 g | mAUM | Silicone | 1.024 | 0.453 | 22 |
| G3.2 | 2 | 1 | 1 g | mAUM | Silicone | 1.528 | 0.566 | 23 |
| G3.2 | 2 | 1 | 1 g | mAUM | Silicone | 1.185 | 0.44  | 24 |
| G3.2 | 2 | 1 | 1 g | mAUM | Silicone | 1.182 | 0.501 | 25 |
| G3.3 | 3 | 1 | 1 g | mAUM | Silicone | 1.819 | 0.522 | 1  |
| G3.3 | 3 | 1 | 1 g | mAUM | Silicone | 1.342 | 0.447 | 2  |
| G3.3 | 3 | 1 | 1 g | mAUM | Silicone | 1.043 | 0.4   | 3  |
| G3.3 | 3 | 1 | 1 g | mAUM | Silicone | 1.565 | 0.506 | 4  |
| G3.3 | 3 | 1 | 1 g | mAUM | Silicone | 0.963 | 0.442 | 5  |
| G3.3 | 3 | 1 | 1 g | mAUM | Silicone | 0.967 | 0.495 | 6  |
| G3.3 | 3 | 1 | 1 g | mAUM | Silicone | 1.211 | 0.442 | 7  |
| G3.3 | 3 | 1 | 1 g | mAUM | Silicone | 1.039 | 0.422 | 8  |
| G3.3 | 3 | 1 | 1 g | mAUM | Silicone | 1.358 | 0.414 | 9  |
| G3.3 | 3 | 1 | 1 g | mAUM | Silicone | 1.154 | 0.441 | 10 |
| G3.3 | 3 | 1 | 1 g | mAUM | Silicone | 1.11  | 0.555 | 11 |
| G3.3 | 3 | 1 | 1 g | mAUM | Silicone | 1.191 | 0.529 | 12 |
| G3.3 | 3 | 1 | 1 g | mAUM | Silicone | 1.05  | 0.513 | 13 |
| G3.3 | 3 | 1 | 1 g | mAUM | Silicone | 1.117 | 0.339 | 14 |
| G3.3 | 3 | 1 | 1 g | mAUM | Silicone | 1.705 | 0.453 | 15 |
| G3.3 | 3 | 1 | 1 g | mAUM | Silicone | 1.733 | 0.472 | 16 |
| G3.3 | 3 | 1 | 1 g | mAUM | Silicone | 1.51  | 0.472 | 17 |
| G3.3 | 3 | 1 | 1 g | mAUM | Silicone | 0.849 | 0.434 | 18 |
| G3.3 | 3 | 1 | 1 g | mAUM | Silicone | 0.938 | 0.55  | 19 |
| G3.3 | 3 | 1 | 1 g | mAUM | Silicone | 1.847 | 0.46  | 20 |
| G3.3 | 3 | 1 | 1 g | mAUM | Silicone | 1.568 | 0.555 | 21 |
| G3.3 | 3 | 1 | 1 g | mAUM | Silicone | 0.841 | 0.484 | 22 |
| G3.3 | 3 | 1 | 1 g | mAUM | Silicone | 1.145 | 0.537 | 23 |
| G3.3 | 3 | 1 | 1 g | mAUM | Silicone | 1.102 | 0.504 | 24 |
| G3.3 | 3 | 1 | 1 g | mAUM | Silicone | 1.274 | 0.573 | 25 |
| G3.4 | 4 | 1 | 1 g | mAUM | Silicone | 1.028 | 0.321 | 1  |
| G3.4 | 4 | 1 | 1 g | mAUM | Silicone | 1.052 | 0.39  | 2  |
| G3.4 | 4 | 1 | 1 g | mAUM | Silicone | 1.337 | 0.388 | 3  |
| G3.4 | 4 | 1 | 1 g | mAUM | Silicone | 0.986 | 0.388 | 4  |
| G3.4 | 4 | 1 | 1 g | mAUM | Silicone | 0.994 | 0.379 | 5  |
| G3.4 | 4 | 1 | 1 g | mAUM | Silicone | 1.001 | 0.361 | 6  |
| G3.4 | 4 | 1 | 1 g | mAUM | Silicone | 1.146 | 0.303 | 7  |
| G3.4 | 4 | 1 | 1 g | mAUM | Silicone | 1.036 | 0.363 | 8  |
| G3.4 | 4 | 1 | 1 g | mAUM | Silicone | 1.177 | 0.312 | 9  |
| G3.4 | 4 | 1 | 1 g | mAUM | Silicone | 1.041 | 0.351 | 10 |
| G3.4 | 4 | 1 | 1 g | mAUM | Silicone | 1.104 | 0.281 | 11 |
| G3.4 | 4 | 1 | 1 g | mAUM | Silicone | 0.857 | 0.322 | 12 |
| G3.4 | 4 | 1 | 1 g | mAUM | Silicone | 0.908 | 0.35  | 13 |
| G3.4 | 4 | 1 | 1 g | mAUM | Silicone | 1.03  | 0.277 | 14 |
| G3.4 | 4 | 1 | 1 g | mAUM | Silicone | 0.855 | 0.258 | 15 |
| G3.4 | 4 | 1 | 1 g | mAUM | Silicone | 1.078 | 0.312 | 16 |
| G3.4 | 4 | 1 | 1 g | mAUM | Silicone | 0.986 | 0.354 | 17 |
| G3.4 | 4 | 1 | 1 g | mAUM | Silicone | 1.21  | 0.331 | 18 |
| G3.4 | 4 | 1 | 1 g | mAUM | Silicone | 1.041 | 0.313 | 19 |
| G3.4 | 4 | 1 | 1 g | mAUM | Silicone | 0.944 | 0.342 | 20 |
| G3.4 | 4 | 1 | 1 g | mAUM | Silicone | 1.079 | 0.241 | 21 |

|      |   |   |     |      |               |       |       |    |
|------|---|---|-----|------|---------------|-------|-------|----|
| G3.4 | 4 | 1 | 1 g | mAUM | Silicone      | 0.863 | 0.321 | 22 |
| G3.4 | 4 | 1 | 1 g | mAUM | Silicone      | 0.949 | 0.327 | 23 |
| G3.4 | 4 | 1 | 1 g | mAUM | Silicone      | 1.191 | 0.379 | 24 |
| G3.4 | 4 | 1 | 1 g | mAUM | Silicone      | 1.116 | 0.282 | 25 |
| G3.5 | 1 | 1 | 1 g | mAUM | Silicone-DLIP | 1.338 | 0.526 | 1  |
| G3.5 | 1 | 1 | 1 g | mAUM | Silicone-DLIP | 0.998 | 0.453 | 2  |
| G3.5 | 1 | 1 | 1 g | mAUM | Silicone-DLIP | 1.504 | 0.503 | 3  |
| G3.5 | 1 | 1 | 1 g | mAUM | Silicone-DLIP | 1.195 | 0.503 | 4  |
| G3.5 | 1 | 1 | 1 g | mAUM | Silicone-DLIP | 1.158 | 0.549 | 5  |
| G3.5 | 1 | 1 | 1 g | mAUM | Silicone-DLIP | 1.506 | 0.528 | 6  |
| G3.5 | 1 | 1 | 1 g | mAUM | Silicone-DLIP | 1.337 | 0.512 | 7  |
| G3.5 | 1 | 1 | 1 g | mAUM | Silicone-DLIP | 1.137 | 0.564 | 8  |
| G3.5 | 1 | 1 | 1 g | mAUM | Silicone-DLIP | 1.029 | 0.402 | 9  |
| G3.5 | 1 | 1 | 1 g | mAUM | Silicone-DLIP | 1.408 | 0.483 | 10 |
| G3.5 | 1 | 1 | 1 g | mAUM | Silicone-DLIP | 0.918 | 0.54  | 11 |
| G3.5 | 1 | 1 | 1 g | mAUM | Silicone-DLIP | 1.159 | 0.481 | 12 |
| G3.5 | 1 | 1 | 1 g | mAUM | Silicone-DLIP | 1.245 | 0.538 | 13 |
| G3.5 | 1 | 1 | 1 g | mAUM | Silicone-DLIP | 1.482 | 0.488 | 14 |
| G3.5 | 1 | 1 | 1 g | mAUM | Silicone-DLIP | 1.288 | 0.509 | 15 |
| G3.5 | 1 | 1 | 1 g | mAUM | Silicone-DLIP | 1.243 | 0.469 | 16 |
| G3.5 | 1 | 1 | 1 g | mAUM | Silicone-DLIP | 1.206 | 0.48  | 17 |
| G3.5 | 1 | 1 | 1 g | mAUM | Silicone-DLIP | 1.203 | 0.484 | 18 |
| G3.5 | 1 | 1 | 1 g | mAUM | Silicone-DLIP | 1.221 | 0.495 | 19 |
| G3.5 | 1 | 1 | 1 g | mAUM | Silicone-DLIP | 1.261 | 0.469 | 20 |
| G3.5 | 1 | 1 | 1 g | mAUM | Silicone-DLIP | 1.248 | 0.53  | 21 |
| G3.5 | 1 | 1 | 1 g | mAUM | Silicone-DLIP | 1.308 | 0.473 | 22 |
| G3.5 | 1 | 1 | 1 g | mAUM | Silicone-DLIP | 0.938 | 0.55  | 23 |
| G3.5 | 1 | 1 | 1 g | mAUM | Silicone-DLIP | 0.978 | 0.49  | 24 |
| G3.5 | 1 | 1 | 1 g | mAUM | Silicone-DLIP | 1.158 | 0.481 | 25 |
| G3.6 | 2 | 1 | 1 g | mAUM | Silicone-DLIP | 1.417 | 0.456 | 1  |
| G3.6 | 2 | 1 | 1 g | mAUM | Silicone-DLIP | 1.707 | 0.569 | 2  |
| G3.6 | 2 | 1 | 1 g | mAUM | Silicone-DLIP | 1.597 | 0.526 | 3  |
| G3.6 | 2 | 1 | 1 g | mAUM | Silicone-DLIP | 0.896 | 0.608 | 4  |
| G3.6 | 2 | 1 | 1 g | mAUM | Silicone-DLIP | 1.185 | 0.418 | 5  |
| G3.6 | 2 | 1 | 1 g | mAUM | Silicone-DLIP | 1.298 | 0.528 | 6  |
| G3.6 | 2 | 1 | 1 g | mAUM | Silicone-DLIP | 1.427 | 0.584 | 7  |
| G3.6 | 2 | 1 | 1 g | mAUM | Silicone-DLIP | 1.467 | 0.5   | 8  |
| G3.6 | 2 | 1 | 1 g | mAUM | Silicone-DLIP | 1.5   | 0.44  | 9  |
| G3.6 | 2 | 1 | 1 g | mAUM | Silicone-DLIP | 1.642 | 0.563 | 10 |
| G3.6 | 2 | 1 | 1 g | mAUM | Silicone-DLIP | 1.165 | 0.518 | 11 |
| G3.6 | 2 | 1 | 1 g | mAUM | Silicone-DLIP | 1.36  | 0.427 | 12 |
| G3.6 | 2 | 1 | 1 g | mAUM | Silicone-DLIP | 1.558 | 0.487 | 13 |
| G3.6 | 2 | 1 | 1 g | mAUM | Silicone-DLIP | 1.613 | 0.552 | 14 |
| G3.6 | 2 | 1 | 1 g | mAUM | Silicone-DLIP | 1.768 | 0.456 | 15 |
| G3.6 | 2 | 1 | 1 g | mAUM | Silicone-DLIP | 1.146 | 0.497 | 16 |
| G3.6 | 2 | 1 | 1 g | mAUM | Silicone-DLIP | 1.189 | 0.497 | 17 |
| G3.6 | 2 | 1 | 1 g | mAUM | Silicone-DLIP | 1.642 | 0.502 | 18 |
| G3.6 | 2 | 1 | 1 g | mAUM | Silicone-DLIP | 1.467 | 0.507 | 19 |
| G3.6 | 2 | 1 | 1 g | mAUM | Silicone-DLIP | 1.471 | 0.485 | 20 |
| G3.6 | 2 | 1 | 1 g | mAUM | Silicone-DLIP | 1.161 | 0.522 | 21 |

|      |   |   |     |      |               |       |       |    |
|------|---|---|-----|------|---------------|-------|-------|----|
| G3.6 | 2 | 1 | 1 g | mAUM | Silicone-DLIP | 1.288 | 0.497 | 22 |
| G3.6 | 2 | 1 | 1 g | mAUM | Silicone-DLIP | 1.178 | 0.467 | 23 |
| G3.6 | 2 | 1 | 1 g | mAUM | Silicone-DLIP | 1.131 | 0.552 | 24 |
| G3.6 | 2 | 1 | 1 g | mAUM | Silicone-DLIP | 1.274 | 0.548 | 25 |
| G3.7 | 3 | 1 | 1 g | mAUM | Silicone-DLIP | 1.657 | 0.422 | 1  |
| G3.7 | 3 | 1 | 1 g | mAUM | Silicone-DLIP | 1.335 | 0.44  | 2  |
| G3.7 | 3 | 1 | 1 g | mAUM | Silicone-DLIP | 1.164 | 0.4   | 3  |
| G3.7 | 3 | 1 | 1 g | mAUM | Silicone-DLIP | 1.487 | 0.432 | 4  |
| G3.7 | 3 | 1 | 1 g | mAUM | Silicone-DLIP | 1.427 | 0.449 | 5  |
| G3.7 | 3 | 1 | 1 g | mAUM | Silicone-DLIP | 1.154 | 0.484 | 6  |
| G3.7 | 3 | 1 | 1 g | mAUM | Silicone-DLIP | 1.23  | 0.439 | 7  |
| G3.7 | 3 | 1 | 1 g | mAUM | Silicone-DLIP | 1.344 | 0.5   | 8  |
| G3.7 | 3 | 1 | 1 g | mAUM | Silicone-DLIP | 1.244 | 0.512 | 9  |
| G3.7 | 3 | 1 | 1 g | mAUM | Silicone-DLIP | 1.088 | 0.414 | 10 |
| G3.7 | 3 | 1 | 1 g | mAUM | Silicone-DLIP | 0.96  | 0.518 | 11 |
| G3.7 | 3 | 1 | 1 g | mAUM | Silicone-DLIP | 1.154 | 0.456 | 12 |
| G3.7 | 3 | 1 | 1 g | mAUM | Silicone-DLIP | 0.861 | 0.543 | 13 |
| G3.7 | 3 | 1 | 1 g | mAUM | Silicone-DLIP | 0.849 | 0.386 | 14 |
| G3.7 | 3 | 1 | 1 g | mAUM | Silicone-DLIP | 0.914 | 0.402 | 15 |
| G3.7 | 3 | 1 | 1 g | mAUM | Silicone-DLIP | 1.035 | 0.51  | 16 |
| G3.7 | 3 | 1 | 1 g | mAUM | Silicone-DLIP | 1.497 | 0.487 | 17 |
| G3.7 | 3 | 1 | 1 g | mAUM | Silicone-DLIP | 1.256 | 0.447 | 18 |
| G3.7 | 3 | 1 | 1 g | mAUM | Silicone-DLIP | 1.164 | 0.511 | 19 |
| G3.7 | 3 | 1 | 1 g | mAUM | Silicone-DLIP | 1.331 | 0.46  | 20 |
| G3.7 | 3 | 1 | 1 g | mAUM | Silicone-DLIP | 1.109 | 0.441 | 21 |
| G3.7 | 3 | 1 | 1 g | mAUM | Silicone-DLIP | 1.521 | 0.42  | 22 |
| G3.7 | 3 | 1 | 1 g | mAUM | Silicone-DLIP | 0.913 | 0.464 | 23 |
| G3.7 | 3 | 1 | 1 g | mAUM | Silicone-DLIP | 1.422 | 0.46  | 24 |
| G3.7 | 3 | 1 | 1 g | mAUM | Silicone-DLIP | 1.288 | 0.457 | 25 |
| G3.8 | 4 | 1 | 1 g | mAUM | Silicone-DLIP | 1.418 | 0.441 | 1  |
| G3.8 | 4 | 1 | 1 g | mAUM | Silicone-DLIP | 1.05  | 0.573 | 2  |
| G3.8 | 4 | 1 | 1 g | mAUM | Silicone-DLIP | 1.065 | 0.544 | 3  |
| G3.8 | 4 | 1 | 1 g | mAUM | Silicone-DLIP | 0.948 | 0.456 | 4  |
| G3.8 | 4 | 1 | 1 g | mAUM | Silicone-DLIP | 1.161 | 0.44  | 5  |
| G3.8 | 4 | 1 | 1 g | mAUM | Silicone-DLIP | 0.956 | 0.53  | 6  |
| G3.8 | 4 | 1 | 1 g | mAUM | Silicone-DLIP | 1.456 | 0.5   | 7  |
| G3.8 | 4 | 1 | 1 g | mAUM | Silicone-DLIP | 1.34  | 0.381 | 8  |
| G3.8 | 4 | 1 | 1 g | mAUM | Silicone-DLIP | 0.74  | 0.51  | 9  |
| G3.8 | 4 | 1 | 1 g | mAUM | Silicone-DLIP | 1.16  | 0.497 | 10 |
| G3.8 | 4 | 1 | 1 g | mAUM | Silicone-DLIP | 1.218 | 0.608 | 11 |
| G3.8 | 4 | 1 | 1 g | mAUM | Silicone-DLIP | 1.344 | 0.425 | 12 |
| G3.8 | 4 | 1 | 1 g | mAUM | Silicone-DLIP | 1.082 | 0.513 | 13 |
| G3.8 | 4 | 1 | 1 g | mAUM | Silicone-DLIP | 0.84  | 0.497 | 14 |
| G3.8 | 4 | 1 | 1 g | mAUM | Silicone-DLIP | 1.116 | 0.467 | 15 |
| G3.8 | 4 | 1 | 1 g | mAUM | Silicone-DLIP | 1.081 | 0.453 | 16 |
| G3.8 | 4 | 1 | 1 g | mAUM | Silicone-DLIP | 0.751 | 0.477 | 17 |
| G3.8 | 4 | 1 | 1 g | mAUM | Silicone-DLIP | 1.467 | 0.459 | 18 |
| G3.8 | 4 | 1 | 1 g | mAUM | Silicone-DLIP | 0.882 | 0.533 | 19 |
| G3.8 | 4 | 1 | 1 g | mAUM | Silicone-DLIP | 0.987 | 0.498 | 20 |
| G3.8 | 4 | 1 | 1 g | mAUM | Silicone-DLIP | 1.016 | 0.544 | 21 |

|      |   |   |     |      |                    |       |       |    |
|------|---|---|-----|------|--------------------|-------|-------|----|
| G3.8 | 4 | 1 | 1 g | mAUM | Silicone-DLIP      | 1.095 | 0.417 | 22 |
| G3.8 | 4 | 1 | 1 g | mAUM | Silicone-DLIP      | 1.093 | 0.512 | 23 |
| G3.8 | 4 | 1 | 1 g | mAUM | Silicone-DLIP      | 0.999 | 0.495 | 24 |
| G3.8 | 4 | 1 | 1 g | mAUM | Silicone-DLIP      | 1.175 | 0.4   | 25 |
| G8.5 | 1 | 2 | 1 g | mAUM | Cellulose Membrane | 1.039 | 0.359 | 1  |
| G8.5 | 1 | 2 | 1 g | mAUM | Cellulose Membrane | 0.502 | 0.384 | 2  |
| G8.5 | 1 | 2 | 1 g | mAUM | Cellulose Membrane | 0.789 | 0.321 | 3  |
| G8.5 | 1 | 2 | 1 g | mAUM | Cellulose Membrane | 0.585 | 0.321 | 4  |
| G8.5 | 1 | 2 | 1 g | mAUM | Cellulose Membrane | 0.619 | 0.321 | 5  |
| G8.5 | 1 | 2 | 1 g | mAUM | Cellulose Membrane | 0.942 | 0.352 | 6  |
| G8.5 | 1 | 2 | 1 g | mAUM | Cellulose Membrane | 1.245 | 0.378 | 7  |
| G8.5 | 1 | 2 | 1 g | mAUM | Cellulose Membrane | 0.815 | 0.347 | 8  |
| G8.5 | 1 | 2 | 1 g | mAUM | Cellulose Membrane | 1.03  | 0.308 | 9  |
| G8.5 | 1 | 2 | 1 g | mAUM | Cellulose Membrane | 0.679 | 0.302 | 10 |
| G8.5 | 1 | 2 | 1 g | mAUM | Cellulose Membrane | 1.166 | 0.326 | 11 |
| G8.5 | 1 | 2 | 1 g | mAUM | Cellulose Membrane | 0.986 | 0.361 | 12 |
| G8.5 | 1 | 2 | 1 g | mAUM | Cellulose Membrane | 0.991 | 0.322 | 13 |
| G8.5 | 1 | 2 | 1 g | mAUM | Cellulose Membrane | 0.635 | 0.367 | 14 |
| G8.5 | 1 | 2 | 1 g | mAUM | Cellulose Membrane | 0.719 | 0.322 | 15 |
| G8.5 | 1 | 2 | 1 g | mAUM | Cellulose Membrane | 0.593 | 0.329 | 16 |
| G8.5 | 1 | 2 | 1 g | mAUM | Cellulose Membrane | 0.741 | 0.349 | 17 |
| G8.5 | 1 | 2 | 1 g | mAUM | Cellulose Membrane | 0.853 | 0.317 | 18 |
| G8.5 | 1 | 2 | 1 g | mAUM | Cellulose Membrane | 0.753 | 0.326 | 19 |
| G8.5 | 1 | 2 | 1 g | mAUM | Cellulose Membrane | 0.796 | 0.332 | 20 |
| G8.5 | 1 | 2 | 1 g | mAUM | Cellulose Membrane | 0.762 | 0.281 | 21 |
| G8.5 | 1 | 2 | 1 g | mAUM | Cellulose Membrane | 0.898 | 0.332 | 22 |
| G8.5 | 1 | 2 | 1 g | mAUM | Cellulose Membrane | 0.508 | 0.331 | 23 |

|      |   |   |     |      |                    |       |       |    |
|------|---|---|-----|------|--------------------|-------|-------|----|
| G8.5 | 1 | 2 | 1 g | mAUM | Cellulose Membrane | 0.676 | 0.311 | 24 |
| G8.5 | 1 | 2 | 1 g | mAUM | Cellulose Membrane | 0.622 | 0.391 | 25 |
| G8.6 | 2 | 2 | 1 g | mAUM | Cellulose Membrane | 0.789 | 0.381 | 1  |
| G8.6 | 2 | 2 | 1 g | mAUM | Cellulose Membrane | 0.752 | 0.292 | 2  |
| G8.6 | 2 | 2 | 1 g | mAUM | Cellulose Membrane | 0.986 | 0.346 | 3  |
| G8.6 | 2 | 2 | 1 g | mAUM | Cellulose Membrane | 0.897 | 0.343 | 4  |
| G8.6 | 2 | 2 | 1 g | mAUM | Cellulose Membrane | 0.927 | 0.297 | 5  |
| G8.6 | 2 | 2 | 1 g | mAUM | Cellulose Membrane | 0.656 | 0.341 | 6  |
| G8.6 | 2 | 2 | 1 g | mAUM | Cellulose Membrane | 0.896 | 0.328 | 7  |
| G8.6 | 2 | 2 | 1 g | mAUM | Cellulose Membrane | 0.754 | 0.333 | 8  |
| G8.6 | 2 | 2 | 1 g | mAUM | Cellulose Membrane | 0.731 | 0.282 | 9  |
| G8.6 | 2 | 2 | 1 g | mAUM | Cellulose Membrane | 0.693 | 0.353 | 10 |
| G8.6 | 2 | 2 | 1 g | mAUM | Cellulose Membrane | 0.67  | 0.361 | 11 |
| G8.6 | 2 | 2 | 1 g | mAUM | Cellulose Membrane | 0.643 | 0.242 | 12 |
| G8.6 | 2 | 2 | 1 g | mAUM | Cellulose Membrane | 0.625 | 0.285 | 13 |
| G8.6 | 2 | 2 | 1 g | mAUM | Cellulose Membrane | 0.791 | 0.303 | 14 |
| G8.6 | 2 | 2 | 1 g | mAUM | Cellulose Membrane | 0.751 | 0.316 | 15 |
| G8.6 | 2 | 2 | 1 g | mAUM | Cellulose Membrane | 0.648 | 0.376 | 16 |
| G8.6 | 2 | 2 | 1 g | mAUM | Cellulose Membrane | 0.705 | 0.36  | 17 |
| G8.6 | 2 | 2 | 1 g | mAUM | Cellulose Membrane | 0.731 | 0.446 | 18 |
| G8.6 | 2 | 2 | 1 g | mAUM | Cellulose Membrane | 0.663 | 0.29  | 19 |
| G8.6 | 2 | 2 | 1 g | mAUM | Cellulose Membrane | 0.895 | 0.324 | 20 |
| G8.6 | 2 | 2 | 1 g | mAUM | Cellulose Membrane | 0.925 | 0.324 | 21 |
| G8.6 | 2 | 2 | 1 g | mAUM | Cellulose Membrane | 0.887 | 0.323 | 22 |
| G8.6 | 2 | 2 | 1 g | mAUM | Cellulose Membrane | 0.801 | 0.329 | 23 |

|      |   |   |     |      |                    |       |       |    |
|------|---|---|-----|------|--------------------|-------|-------|----|
| G8.6 | 2 | 2 | 1 g | mAUM | Cellulose Membrane | 0.699 | 0.314 | 24 |
| G8.6 | 2 | 2 | 1 g | mAUM | Cellulose Membrane | 0.869 | 0.301 | 25 |
| G8.7 | 3 | 2 | 1 g | mAUM | Cellulose Membrane | 0.708 | 0.288 | 1  |
| G8.7 | 3 | 2 | 1 g | mAUM | Cellulose Membrane | 0.865 | 0.315 | 2  |
| G8.7 | 3 | 2 | 1 g | mAUM | Cellulose Membrane | 0.834 | 0.35  | 3  |
| G8.7 | 3 | 2 | 1 g | mAUM | Cellulose Membrane | 0.866 | 0.301 | 4  |
| G8.7 | 3 | 2 | 1 g | mAUM | Cellulose Membrane | 1.04  | 0.302 | 5  |
| G8.7 | 3 | 2 | 1 g | mAUM | Cellulose Membrane | 0.747 | 0.363 | 6  |
| G8.7 | 3 | 2 | 1 g | mAUM | Cellulose Membrane | 0.819 | 0.289 | 7  |
| G8.7 | 3 | 2 | 1 g | mAUM | Cellulose Membrane | 0.899 | 0.301 | 8  |
| G8.7 | 3 | 2 | 1 g | mAUM | Cellulose Membrane | 0.843 | 0.318 | 9  |
| G8.7 | 3 | 2 | 1 g | mAUM | Cellulose Membrane | 0.966 | 0.315 | 10 |
| G8.7 | 3 | 2 | 1 g | mAUM | Cellulose Membrane | 0.857 | 0.313 | 11 |
| G8.7 | 3 | 2 | 1 g | mAUM | Cellulose Membrane | 0.898 | 0.337 | 12 |
| G8.7 | 3 | 2 | 1 g | mAUM | Cellulose Membrane | 0.78  | 0.323 | 13 |
| G8.7 | 3 | 2 | 1 g | mAUM | Cellulose Membrane | 0.879 | 0.318 | 14 |
| G8.7 | 3 | 2 | 1 g | mAUM | Cellulose Membrane | 0.879 | 0.341 | 15 |
| G8.7 | 3 | 2 | 1 g | mAUM | Cellulose Membrane | 0.949 | 0.341 | 16 |
| G8.7 | 3 | 2 | 1 g | mAUM | Cellulose Membrane | 0.868 | 0.31  | 17 |
| G8.7 | 3 | 2 | 1 g | mAUM | Cellulose Membrane | 1.144 | 0.392 | 18 |
| G8.7 | 3 | 2 | 1 g | mAUM | Cellulose Membrane | 0.92  | 0.327 | 19 |
| G8.7 | 3 | 2 | 1 g | mAUM | Cellulose Membrane | 0.793 | 0.363 | 20 |
| G8.7 | 3 | 2 | 1 g | mAUM | Cellulose Membrane | 1.111 | 0.35  | 21 |
| G8.7 | 3 | 2 | 1 g | mAUM | Cellulose Membrane | 0.975 | 0.344 | 22 |
| G8.7 | 3 | 2 | 1 g | mAUM | Cellulose Membrane | 0.965 | 0.36  | 23 |

|      |   |   |     |      |                    |       |       |    |
|------|---|---|-----|------|--------------------|-------|-------|----|
| G8.7 | 3 | 2 | 1 g | mAUM | Cellulose Membrane | 0.996 | 0.305 | 24 |
| G8.7 | 3 | 2 | 1 g | mAUM | Cellulose Membrane | 0.71  | 0.267 | 25 |
| G8.8 | 4 | 2 | 1 g | mAUM | Cellulose Membrane | 0.973 | 0.376 | 1  |
| G8.8 | 4 | 2 | 1 g | mAUM | Cellulose Membrane | 0.853 | 0.27  | 2  |
| G8.8 | 4 | 2 | 1 g | mAUM | Cellulose Membrane | 0.818 | 0.248 | 3  |
| G8.8 | 4 | 2 | 1 g | mAUM | Cellulose Membrane | 0.796 | 0.267 | 4  |
| G8.8 | 4 | 2 | 1 g | mAUM | Cellulose Membrane | 0.504 | 0.278 | 5  |
| G8.8 | 4 | 2 | 1 g | mAUM | Cellulose Membrane | 0.874 | 0.29  | 6  |
| G8.8 | 4 | 2 | 1 g | mAUM | Cellulose Membrane | 1.036 | 0.255 | 7  |
| G8.8 | 4 | 2 | 1 g | mAUM | Cellulose Membrane | 0.781 | 0.299 | 8  |
| G8.8 | 4 | 2 | 1 g | mAUM | Cellulose Membrane | 0.583 | 0.246 | 9  |
| G8.8 | 4 | 2 | 1 g | mAUM | Cellulose Membrane | 0.703 | 0.273 | 10 |
| G8.8 | 4 | 2 | 1 g | mAUM | Cellulose Membrane | 0.733 | 0.312 | 11 |
| G8.8 | 4 | 2 | 1 g | mAUM | Cellulose Membrane | 0.835 | 0.366 | 12 |
| G8.8 | 4 | 2 | 1 g | mAUM | Cellulose Membrane | 0.885 | 0.351 | 13 |
| G8.8 | 4 | 2 | 1 g | mAUM | Cellulose Membrane | 0.751 | 0.305 | 14 |
| G8.8 | 4 | 2 | 1 g | mAUM | Cellulose Membrane | 0.872 | 0.252 | 15 |
| G8.8 | 4 | 2 | 1 g | mAUM | Cellulose Membrane | 0.782 | 0.327 | 16 |
| G8.8 | 4 | 2 | 1 g | mAUM | Cellulose Membrane | 0.668 | 0.292 | 17 |
| G8.8 | 4 | 2 | 1 g | mAUM | Cellulose Membrane | 0.697 | 0.265 | 18 |
| G8.8 | 4 | 2 | 1 g | mAUM | Cellulose Membrane | 0.997 | 0.303 | 19 |
| G8.8 | 4 | 2 | 1 g | mAUM | Cellulose Membrane | 0.598 | 0.323 | 20 |
| G8.8 | 4 | 2 | 1 g | mAUM | Cellulose Membrane | 0.566 | 0.295 | 21 |
| G8.8 | 4 | 2 | 1 g | mAUM | Cellulose Membrane | 0.592 | 0.239 | 22 |
| G8.8 | 4 | 2 | 1 g | mAUM | Cellulose Membrane | 0.838 | 0.358 | 23 |

|      |   |   |     |      |                    |       |       |    |
|------|---|---|-----|------|--------------------|-------|-------|----|
| G8.8 | 4 | 2 | 1 g | mAUM | Cellulose Membrane | 0.761 | 0.311 | 24 |
| G8.8 | 4 | 2 | 1 g | mAUM | Cellulose Membrane | 0.568 | 0.342 | 25 |
| G9.1 | 1 | 2 | 1 g | mAUM | Silicone           | 0.962 | 0.306 | 1  |
| G9.1 | 1 | 2 | 1 g | mAUM | Silicone           | 1.033 | 0.313 | 2  |
| G9.1 | 1 | 2 | 1 g | mAUM | Silicone           | 0.705 | 0.399 | 3  |
| G9.1 | 1 | 2 | 1 g | mAUM | Silicone           | 0.645 | 0.336 | 4  |
| G9.1 | 1 | 2 | 1 g | mAUM | Silicone           | 0.837 | 0.362 | 5  |
| G9.1 | 1 | 2 | 1 g | mAUM | Silicone           | 0.697 | 0.353 | 6  |
| G9.1 | 1 | 2 | 1 g | mAUM | Silicone           | 0.735 | 0.284 | 7  |
| G9.1 | 1 | 2 | 1 g | mAUM | Silicone           | 0.775 | 0.315 | 8  |
| G9.1 | 1 | 2 | 1 g | mAUM | Silicone           | 1.099 | 0.355 | 9  |
| G9.1 | 1 | 2 | 1 g | mAUM | Silicone           | 0.939 | 0.313 | 10 |
| G9.1 | 1 | 2 | 1 g | mAUM | Silicone           | 0.754 | 0.35  | 11 |
| G9.1 | 1 | 2 | 1 g | mAUM | Silicone           | 0.734 | 0.334 | 12 |
| G9.1 | 1 | 2 | 1 g | mAUM | Silicone           | 0.621 | 0.314 | 13 |
| G9.1 | 1 | 2 | 1 g | mAUM | Silicone           | 0.731 | 0.301 | 14 |
| G9.1 | 1 | 2 | 1 g | mAUM | Silicone           | 0.829 | 0.228 | 15 |
| G9.1 | 1 | 2 | 1 g | mAUM | Silicone           | 0.8   | 0.269 | 16 |
| G9.1 | 1 | 2 | 1 g | mAUM | Silicone           | 0.812 | 0.404 | 17 |
| G9.1 | 1 | 2 | 1 g | mAUM | Silicone           | 0.9   | 0.329 | 18 |
| G9.1 | 1 | 2 | 1 g | mAUM | Silicone           | 0.801 | 0.305 | 19 |
| G9.1 | 1 | 2 | 1 g | mAUM | Silicone           | 0.699 | 0.377 | 20 |
| G9.1 | 1 | 2 | 1 g | mAUM | Silicone           | 1.054 | 0.39  | 21 |
| G9.1 | 1 | 2 | 1 g | mAUM | Silicone           | 0.818 | 0.288 | 22 |
| G9.1 | 1 | 2 | 1 g | mAUM | Silicone           | 0.778 | 0.285 | 23 |
| G9.1 | 1 | 2 | 1 g | mAUM | Silicone           | 0.79  | 0.382 | 24 |
| G9.1 | 1 | 2 | 1 g | mAUM | Silicone           | 0.955 | 0.295 | 25 |
| G9.2 | 2 | 2 | 1 g | mAUM | Silicone           | 0.806 | 0.301 | 1  |
| G9.2 | 2 | 2 | 1 g | mAUM | Silicone           | 0.894 | 0.366 | 2  |
| G9.2 | 2 | 2 | 1 g | mAUM | Silicone           | 0.71  | 0.412 | 3  |
| G9.2 | 2 | 2 | 1 g | mAUM | Silicone           | 0.777 | 0.288 | 4  |
| G9.2 | 2 | 2 | 1 g | mAUM | Silicone           | 0.867 | 0.303 | 5  |
| G9.2 | 2 | 2 | 1 g | mAUM | Silicone           | 0.753 | 0.35  | 6  |
| G9.2 | 2 | 2 | 1 g | mAUM | Silicone           | 1.036 | 0.282 | 7  |
| G9.2 | 2 | 2 | 1 g | mAUM | Silicone           | 0.907 | 0.298 | 8  |
| G9.2 | 2 | 2 | 1 g | mAUM | Silicone           | 1.096 | 0.372 | 9  |
| G9.2 | 2 | 2 | 1 g | mAUM | Silicone           | 0.96  | 0.319 | 10 |
| G9.2 | 2 | 2 | 1 g | mAUM | Silicone           | 1.141 | 0.365 | 11 |
| G9.2 | 2 | 2 | 1 g | mAUM | Silicone           | 0.718 | 0.296 | 12 |
| G9.2 | 2 | 2 | 1 g | mAUM | Silicone           | 0.677 | 0.298 | 13 |
| G9.2 | 2 | 2 | 1 g | mAUM | Silicone           | 0.791 | 0.409 | 14 |
| G9.2 | 2 | 2 | 1 g | mAUM | Silicone           | 1.265 | 0.419 | 15 |
| G9.2 | 2 | 2 | 1 g | mAUM | Silicone           | 0.815 | 0.294 | 16 |
| G9.2 | 2 | 2 | 1 g | mAUM | Silicone           | 1.135 | 0.323 | 17 |
| G9.2 | 2 | 2 | 1 g | mAUM | Silicone           | 1.25  | 0.258 | 18 |
| G9.2 | 2 | 2 | 1 g | mAUM | Silicone           | 1.089 | 0.244 | 19 |
| G9.2 | 2 | 2 | 1 g | mAUM | Silicone           | 0.996 | 0.319 | 20 |
| G9.2 | 2 | 2 | 1 g | mAUM | Silicone           | 1.004 | 0.317 | 21 |

|      |   |   |     |      |          |       |       |    |
|------|---|---|-----|------|----------|-------|-------|----|
| G9.2 | 2 | 2 | 1 g | mAUM | Silicone | 1.319 | 0.249 | 22 |
| G9.2 | 2 | 2 | 1 g | mAUM | Silicone | 0.842 | 0.329 | 23 |
| G9.2 | 2 | 2 | 1 g | mAUM | Silicone | 0.634 | 0.308 | 24 |
| G9.2 | 2 | 2 | 1 g | mAUM | Silicone | 0.885 | 0.384 | 25 |
| G9.3 | 3 | 2 | 1 g | mAUM | Silicone | 0.839 | 0.296 | 1  |
| G9.3 | 3 | 2 | 1 g | mAUM | Silicone | 0.978 | 0.294 | 2  |
| G9.3 | 3 | 2 | 1 g | mAUM | Silicone | 0.753 | 0.303 | 3  |
| G9.3 | 3 | 2 | 1 g | mAUM | Silicone | 0.799 | 0.314 | 4  |
| G9.3 | 3 | 2 | 1 g | mAUM | Silicone | 1.136 | 0.284 | 5  |
| G9.3 | 3 | 2 | 1 g | mAUM | Silicone | 0.704 | 0.314 | 6  |
| G9.3 | 3 | 2 | 1 g | mAUM | Silicone | 0.905 | 0.302 | 7  |
| G9.3 | 3 | 2 | 1 g | mAUM | Silicone | 1.024 | 0.304 | 8  |
| G9.3 | 3 | 2 | 1 g | mAUM | Silicone | 0.856 | 0.276 | 9  |
| G9.3 | 3 | 2 | 1 g | mAUM | Silicone | 0.647 | 0.315 | 10 |
| G9.3 | 3 | 2 | 1 g | mAUM | Silicone | 0.95  | 0.298 | 11 |
| G9.3 | 3 | 2 | 1 g | mAUM | Silicone | 0.646 | 0.312 | 12 |
| G9.3 | 3 | 2 | 1 g | mAUM | Silicone | 0.854 | 0.336 | 13 |
| G9.3 | 3 | 2 | 1 g | mAUM | Silicone | 0.998 | 0.296 | 14 |
| G9.3 | 3 | 2 | 1 g | mAUM | Silicone | 0.637 | 0.298 | 15 |
| G9.3 | 3 | 2 | 1 g | mAUM | Silicone | 0.932 | 0.295 | 16 |
| G9.3 | 3 | 2 | 1 g | mAUM | Silicone | 0.647 | 0.315 | 17 |
| G9.3 | 3 | 2 | 1 g | mAUM | Silicone | 0.95  | 0.298 | 18 |
| G9.3 | 3 | 2 | 1 g | mAUM | Silicone | 0.646 | 0.312 | 19 |
| G9.3 | 3 | 2 | 1 g | mAUM | Silicone | 0.854 | 0.336 | 20 |
| G9.3 | 3 | 2 | 1 g | mAUM | Silicone | 0.998 | 0.296 | 21 |
| G9.3 | 3 | 2 | 1 g | mAUM | Silicone | 0.637 | 0.298 | 22 |
| G9.3 | 3 | 2 | 1 g | mAUM | Silicone | 0.932 | 0.295 | 23 |
| G9.3 | 3 | 2 | 1 g | mAUM | Silicone | 0.936 | 0.263 | 24 |
| G9.3 | 3 | 2 | 1 g | mAUM | Silicone | 0.875 | 0.281 | 25 |
| G9.4 | 4 | 2 | 1 g | mAUM | Silicone | 0.855 | 0.283 | 1  |
| G9.4 | 4 | 2 | 1 g | mAUM | Silicone | 0.976 | 0.304 | 2  |
| G9.4 | 4 | 2 | 1 g | mAUM | Silicone | 1.131 | 0.358 | 3  |
| G9.4 | 4 | 2 | 1 g | mAUM | Silicone | 0.88  | 0.287 | 4  |
| G9.4 | 4 | 2 | 1 g | mAUM | Silicone | 0.771 | 0.348 | 5  |
| G9.4 | 4 | 2 | 1 g | mAUM | Silicone | 0.844 | 0.266 | 6  |
| G9.4 | 4 | 2 | 1 g | mAUM | Silicone | 0.867 | 0.253 | 7  |
| G9.4 | 4 | 2 | 1 g | mAUM | Silicone | 0.981 | 0.234 | 8  |
| G9.4 | 4 | 2 | 1 g | mAUM | Silicone | 1.101 | 0.321 | 9  |
| G9.4 | 4 | 2 | 1 g | mAUM | Silicone | 0.796 | 0.255 | 10 |
| G9.4 | 4 | 2 | 1 g | mAUM | Silicone | 0.71  | 0.241 | 11 |
| G9.4 | 4 | 2 | 1 g | mAUM | Silicone | 0.72  | 0.233 | 12 |
| G9.4 | 4 | 2 | 1 g | mAUM | Silicone | 0.739 | 0.307 | 13 |
| G9.4 | 4 | 2 | 1 g | mAUM | Silicone | 0.723 | 0.298 | 14 |
| G9.4 | 4 | 2 | 1 g | mAUM | Silicone | 0.641 | 0.272 | 15 |
| G9.4 | 4 | 2 | 1 g | mAUM | Silicone | 0.966 | 0.319 | 16 |
| G9.4 | 4 | 2 | 1 g | mAUM | Silicone | 0.742 | 0.339 | 17 |
| G9.4 | 4 | 2 | 1 g | mAUM | Silicone | 0.779 | 0.304 | 18 |
| G9.4 | 4 | 2 | 1 g | mAUM | Silicone | 0.639 | 0.317 | 19 |
| G9.4 | 4 | 2 | 1 g | mAUM | Silicone | 1.151 | 0.272 | 20 |
| G9.4 | 4 | 2 | 1 g | mAUM | Silicone | 0.614 | 0.343 | 21 |

|      |   |   |     |      |               |       |       |    |
|------|---|---|-----|------|---------------|-------|-------|----|
| G9.4 | 4 | 2 | 1 g | mAUM | Silicone      | 0.927 | 0.309 | 22 |
| G9.4 | 4 | 2 | 1 g | mAUM | Silicone      | 0.675 | 0.34  | 23 |
| G9.4 | 4 | 2 | 1 g | mAUM | Silicone      | 0.631 | 0.358 | 24 |
| G9.4 | 4 | 2 | 1 g | mAUM | Silicone      | 1.067 | 0.303 | 25 |
| G9.5 | 1 | 2 | 1 g | mAUM | Silicone-DLIP | 1.102 | 0.403 | 1  |
| G9.5 | 1 | 2 | 1 g | mAUM | Silicone-DLIP | 0.765 | 0.345 | 2  |
| G9.5 | 1 | 2 | 1 g | mAUM | Silicone-DLIP | 0.717 | 0.301 | 3  |
| G9.5 | 1 | 2 | 1 g | mAUM | Silicone-DLIP | 0.687 | 0.328 | 4  |
| G9.5 | 1 | 2 | 1 g | mAUM | Silicone-DLIP | 0.97  | 0.337 | 5  |
| G9.5 | 1 | 2 | 1 g | mAUM | Silicone-DLIP | 0.86  | 0.285 | 6  |
| G9.5 | 1 | 2 | 1 g | mAUM | Silicone-DLIP | 0.702 | 0.25  | 7  |
| G9.5 | 1 | 2 | 1 g | mAUM | Silicone-DLIP | 0.6   | 0.404 | 8  |
| G9.5 | 1 | 2 | 1 g | mAUM | Silicone-DLIP | 0.914 | 0.358 | 9  |
| G9.5 | 1 | 2 | 1 g | mAUM | Silicone-DLIP | 0.894 | 0.346 | 10 |
| G9.5 | 1 | 2 | 1 g | mAUM | Silicone-DLIP | 0.617 | 0.369 | 11 |
| G9.5 | 1 | 2 | 1 g | mAUM | Silicone-DLIP | 0.884 | 0.366 | 12 |
| G9.5 | 1 | 2 | 1 g | mAUM | Silicone-DLIP | 0.945 | 0.38  | 13 |
| G9.5 | 1 | 2 | 1 g | mAUM | Silicone-DLIP | 0.793 | 0.381 | 14 |
| G9.5 | 1 | 2 | 1 g | mAUM | Silicone-DLIP | 0.729 | 0.317 | 15 |
| G9.5 | 1 | 2 | 1 g | mAUM | Silicone-DLIP | 1.031 | 0.381 | 16 |
| G9.5 | 1 | 2 | 1 g | mAUM | Silicone-DLIP | 0.885 | 0.307 | 17 |
| G9.5 | 1 | 2 | 1 g | mAUM | Silicone-DLIP | 0.752 | 0.296 | 18 |
| G9.5 | 1 | 2 | 1 g | mAUM | Silicone-DLIP | 0.728 | 0.307 | 19 |
| G9.5 | 1 | 2 | 1 g | mAUM | Silicone-DLIP | 0.634 | 0.4   | 20 |
| G9.5 | 1 | 2 | 1 g | mAUM | Silicone-DLIP | 0.898 | 0.367 | 21 |
| G9.5 | 1 | 2 | 1 g | mAUM | Silicone-DLIP | 0.886 | 0.433 | 22 |
| G9.5 | 1 | 2 | 1 g | mAUM | Silicone-DLIP | 0.77  | 0.283 | 23 |
| G9.5 | 1 | 2 | 1 g | mAUM | Silicone-DLIP | 0.688 | 0.286 | 24 |
| G9.5 | 1 | 2 | 1 g | mAUM | Silicone-DLIP | 1.089 | 0.358 | 25 |
| G9.6 | 2 | 2 | 1 g | mAUM | Silicone-DLIP | 1.034 | 0.369 | 1  |
| G9.6 | 2 | 2 | 1 g | mAUM | Silicone-DLIP | 1.006 | 0.38  | 2  |
| G9.6 | 2 | 2 | 1 g | mAUM | Silicone-DLIP | 0.909 | 0.333 | 3  |
| G9.6 | 2 | 2 | 1 g | mAUM | Silicone-DLIP | 0.74  | 0.385 | 4  |
| G9.6 | 2 | 2 | 1 g | mAUM | Silicone-DLIP | 0.902 | 0.309 | 5  |
| G9.6 | 2 | 2 | 1 g | mAUM | Silicone-DLIP | 0.765 | 0.315 | 6  |
| G9.6 | 2 | 2 | 1 g | mAUM | Silicone-DLIP | 0.9   | 0.293 | 7  |
| G9.6 | 2 | 2 | 1 g | mAUM | Silicone-DLIP | 1.231 | 0.361 | 8  |
| G9.6 | 2 | 2 | 1 g | mAUM | Silicone-DLIP | 0.699 | 0.334 | 9  |
| G9.6 | 2 | 2 | 1 g | mAUM | Silicone-DLIP | 0.94  | 0.306 | 10 |
| G9.6 | 2 | 2 | 1 g | mAUM | Silicone-DLIP | 0.97  | 0.343 | 11 |
| G9.6 | 2 | 2 | 1 g | mAUM | Silicone-DLIP | 0.834 | 0.324 | 12 |
| G9.6 | 2 | 2 | 1 g | mAUM | Silicone-DLIP | 0.978 | 0.321 | 13 |
| G9.6 | 2 | 2 | 1 g | mAUM | Silicone-DLIP | 0.816 | 0.289 | 14 |
| G9.6 | 2 | 2 | 1 g | mAUM | Silicone-DLIP | 0.8   | 0.296 | 15 |
| G9.6 | 2 | 2 | 1 g | mAUM | Silicone-DLIP | 0.833 | 0.269 | 16 |
| G9.6 | 2 | 2 | 1 g | mAUM | Silicone-DLIP | 0.936 | 0.306 | 17 |
| G9.6 | 2 | 2 | 1 g | mAUM | Silicone-DLIP | 0.688 | 0.315 | 18 |
| G9.6 | 2 | 2 | 1 g | mAUM | Silicone-DLIP | 0.895 | 0.258 | 19 |
| G9.6 | 2 | 2 | 1 g | mAUM | Silicone-DLIP | 0.772 | 0.361 | 20 |
| G9.6 | 2 | 2 | 1 g | mAUM | Silicone-DLIP | 1.056 | 0.349 | 21 |

|      |   |   |     |      |               |       |       |    |
|------|---|---|-----|------|---------------|-------|-------|----|
| G9.6 | 2 | 2 | 1 g | mAUM | Silicone-DLIP | 0.922 | 0.362 | 22 |
| G9.6 | 2 | 2 | 1 g | mAUM | Silicone-DLIP | 1.041 | 0.349 | 23 |
| G9.6 | 2 | 2 | 1 g | mAUM | Silicone-DLIP | 1.067 | 0.293 | 24 |
| G9.6 | 2 | 2 | 1 g | mAUM | Silicone-DLIP | 0.766 | 0.404 | 25 |
| G9.7 | 3 | 2 | 1 g | mAUM | Silicone-DLIP | 0.76  | 0.337 | 1  |
| G9.7 | 3 | 2 | 1 g | mAUM | Silicone-DLIP | 0.771 | 0.332 | 2  |
| G9.7 | 3 | 2 | 1 g | mAUM | Silicone-DLIP | 0.833 | 0.336 | 3  |
| G9.7 | 3 | 2 | 1 g | mAUM | Silicone-DLIP | 0.829 | 0.325 | 4  |
| G9.7 | 3 | 2 | 1 g | mAUM | Silicone-DLIP | 0.749 | 0.329 | 5  |
| G9.7 | 3 | 2 | 1 g | mAUM | Silicone-DLIP | 0.826 | 0.407 | 6  |
| G9.7 | 3 | 2 | 1 g | mAUM | Silicone-DLIP | 0.895 | 0.325 | 7  |
| G9.7 | 3 | 2 | 1 g | mAUM | Silicone-DLIP | 0.988 | 0.289 | 8  |
| G9.7 | 3 | 2 | 1 g | mAUM | Silicone-DLIP | 0.867 | 0.28  | 9  |
| G9.7 | 3 | 2 | 1 g | mAUM | Silicone-DLIP | 0.728 | 0.298 | 10 |
| G9.7 | 3 | 2 | 1 g | mAUM | Silicone-DLIP | 0.735 | 0.367 | 11 |
| G9.7 | 3 | 2 | 1 g | mAUM | Silicone-DLIP | 0.903 | 0.358 | 12 |
| G9.7 | 3 | 2 | 1 g | mAUM | Silicone-DLIP | 0.779 | 0.33  | 13 |
| G9.7 | 3 | 2 | 1 g | mAUM | Silicone-DLIP | 0.514 | 0.333 | 14 |
| G9.7 | 3 | 2 | 1 g | mAUM | Silicone-DLIP | 0.828 | 0.316 | 15 |
| G9.7 | 3 | 2 | 1 g | mAUM | Silicone-DLIP | 0.735 | 0.332 | 16 |
| G9.7 | 3 | 2 | 1 g | mAUM | Silicone-DLIP | 0.89  | 0.247 | 17 |
| G9.7 | 3 | 2 | 1 g | mAUM | Silicone-DLIP | 0.713 | 0.323 | 18 |
| G9.7 | 3 | 2 | 1 g | mAUM | Silicone-DLIP | 0.755 | 0.303 | 19 |
| G9.7 | 3 | 2 | 1 g | mAUM | Silicone-DLIP | 0.892 | 0.319 | 20 |
| G9.7 | 3 | 2 | 1 g | mAUM | Silicone-DLIP | 0.772 | 0.33  | 21 |
| G9.7 | 3 | 2 | 1 g | mAUM | Silicone-DLIP | 0.931 | 0.36  | 22 |
| G9.7 | 3 | 2 | 1 g | mAUM | Silicone-DLIP | 0.895 | 0.325 | 23 |
| G9.7 | 3 | 2 | 1 g | mAUM | Silicone-DLIP | 0.856 | 0.288 | 24 |
| G9.7 | 3 | 2 | 1 g | mAUM | Silicone-DLIP | 0.794 | 0.38  | 25 |
| G9.8 | 4 | 2 | 1 g | mAUM | Silicone-DLIP | 1.041 | 0.315 | 1  |
| G9.8 | 4 | 2 | 1 g | mAUM | Silicone-DLIP | 0.681 | 0.301 | 2  |
| G9.8 | 4 | 2 | 1 g | mAUM | Silicone-DLIP | 0.894 | 0.325 | 3  |
| G9.8 | 4 | 2 | 1 g | mAUM | Silicone-DLIP | 0.756 | 0.323 | 4  |
| G9.8 | 4 | 2 | 1 g | mAUM | Silicone-DLIP | 0.746 | 0.325 | 5  |
| G9.8 | 4 | 2 | 1 g | mAUM | Silicone-DLIP | 0.753 | 0.319 | 6  |
| G9.8 | 4 | 2 | 1 g | mAUM | Silicone-DLIP | 1.21  | 0.321 | 7  |
| G9.8 | 4 | 2 | 1 g | mAUM | Silicone-DLIP | 0.633 | 0.311 | 8  |
| G9.8 | 4 | 2 | 1 g | mAUM | Silicone-DLIP | 0.577 | 0.332 | 9  |
| G9.8 | 4 | 2 | 1 g | mAUM | Silicone-DLIP | 0.663 | 0.314 | 10 |
| G9.8 | 4 | 2 | 1 g | mAUM | Silicone-DLIP | 0.897 | 0.343 | 11 |
| G9.8 | 4 | 2 | 1 g | mAUM | Silicone-DLIP | 1.012 | 0.312 | 12 |
| G9.8 | 4 | 2 | 1 g | mAUM | Silicone-DLIP | 0.953 | 0.325 | 13 |
| G9.8 | 4 | 2 | 1 g | mAUM | Silicone-DLIP | 0.925 | 0.289 | 14 |
| G9.8 | 4 | 2 | 1 g | mAUM | Silicone-DLIP | 0.971 | 0.296 | 15 |
| G9.8 | 4 | 2 | 1 g | mAUM | Silicone-DLIP | 1.063 | 0.321 | 16 |
| G9.8 | 4 | 2 | 1 g | mAUM | Silicone-DLIP | 1.042 | 0.313 | 17 |
| G9.8 | 4 | 2 | 1 g | mAUM | Silicone-DLIP | 1.128 | 0.295 | 18 |
| G9.8 | 4 | 2 | 1 g | mAUM | Silicone-DLIP | 0.721 | 0.286 | 19 |
| G9.8 | 4 | 2 | 1 g | mAUM | Silicone-DLIP | 0.621 | 0.308 | 20 |
| G9.8 | 4 | 2 | 1 g | mAUM | Silicone-DLIP | 0.831 | 0.264 | 21 |

|       |   |   |     |      |                    |       |       |    |
|-------|---|---|-----|------|--------------------|-------|-------|----|
| G9.8  | 4 | 2 | 1 g | mAUM | Silicone-DLIP      | 0.763 | 0.274 | 22 |
| G9.8  | 4 | 2 | 1 g | mAUM | Silicone-DLIP      | 0.931 | 0.322 | 23 |
| G9.8  | 4 | 2 | 1 g | mAUM | Silicone-DLIP      | 0.793 | 0.308 | 24 |
| G9.8  | 4 | 2 | 1 g | mAUM | Silicone-DLIP      | 0.747 | 0.279 | 25 |
| G14.5 | 1 | 3 | 1 g | mAUM | Cellulose Membrane | 0.767 | 0.296 | 1  |
| G14.5 | 1 | 3 | 1 g | mAUM | Cellulose Membrane | 0.627 | 0.284 | 2  |
| G14.5 | 1 | 3 | 1 g | mAUM | Cellulose Membrane | 0.842 | 0.254 | 3  |
| G14.5 | 1 | 3 | 1 g | mAUM | Cellulose Membrane | 0.686 | 0.349 | 4  |
| G14.5 | 1 | 3 | 1 g | mAUM | Cellulose Membrane | 0.952 | 0.349 | 5  |
| G14.5 | 1 | 3 | 1 g | mAUM | Cellulose Membrane | 0.728 | 0.259 | 6  |
| G14.5 | 1 | 3 | 1 g | mAUM | Cellulose Membrane | 0.72  | 0.373 | 7  |
| G14.5 | 1 | 3 | 1 g | mAUM | Cellulose Membrane | 0.916 | 0.296 | 8  |
| G14.5 | 1 | 3 | 1 g | mAUM | Cellulose Membrane | 0.701 | 0.283 | 9  |
| G14.5 | 1 | 3 | 1 g | mAUM | Cellulose Membrane | 0.637 | 0.324 | 10 |
| G14.5 | 1 | 3 | 1 g | mAUM | Cellulose Membrane | 0.828 | 0.283 | 11 |
| G14.5 | 1 | 3 | 1 g | mAUM | Cellulose Membrane | 0.992 | 0.288 | 12 |
| G14.5 | 1 | 3 | 1 g | mAUM | Cellulose Membrane | 0.885 | 0.313 | 13 |
| G14.5 | 1 | 3 | 1 g | mAUM | Cellulose Membrane | 0.771 | 0.313 | 14 |
| G14.5 | 1 | 3 | 1 g | mAUM | Cellulose Membrane | 0.719 | 0.358 | 15 |
| G14.5 | 1 | 3 | 1 g | mAUM | Cellulose Membrane | 0.742 | 0.265 | 16 |
| G14.5 | 1 | 3 | 1 g | mAUM | Cellulose Membrane | 0.678 | 0.248 | 17 |
| G14.5 | 1 | 3 | 1 g | mAUM | Cellulose Membrane | 0.664 | 0.321 | 18 |
| G14.5 | 1 | 3 | 1 g | mAUM | Cellulose Membrane | 0.888 | 0.324 | 19 |
| G14.5 | 1 | 3 | 1 g | mAUM | Cellulose Membrane | 0.745 | 0.383 | 20 |
| G14.5 | 1 | 3 | 1 g | mAUM | Cellulose Membrane | 0.904 | 0.321 | 21 |
| G14.5 | 1 | 3 | 1 g | mAUM | Cellulose Membrane | 0.703 | 0.318 | 22 |
| G14.5 | 1 | 3 | 1 g | mAUM | Cellulose Membrane | 0.728 | 0.286 | 23 |

|       |   |   |     |      |                    |       |       |    |
|-------|---|---|-----|------|--------------------|-------|-------|----|
| G14.5 | 1 | 3 | 1 g | mAUM | Cellulose Membrane | 0.699 | 0.28  | 24 |
| G14.5 | 1 | 3 | 1 g | mAUM | Cellulose Membrane | 0.839 | 0.281 | 25 |
| G14.6 | 2 | 3 | 1 g | mAUM | Cellulose Membrane | 0.769 | 0.29  | 1  |
| G14.6 | 2 | 3 | 1 g | mAUM | Cellulose Membrane | 0.744 | 0.295 | 2  |
| G14.6 | 2 | 3 | 1 g | mAUM | Cellulose Membrane | 0.732 | 0.309 | 3  |
| G14.6 | 2 | 3 | 1 g | mAUM | Cellulose Membrane | 0.667 | 0.284 | 4  |
| G14.6 | 2 | 3 | 1 g | mAUM | Cellulose Membrane | 0.748 | 0.272 | 5  |
| G14.6 | 2 | 3 | 1 g | mAUM | Cellulose Membrane | 0.85  | 0.281 | 6  |
| G14.6 | 2 | 3 | 1 g | mAUM | Cellulose Membrane | 0.65  | 0.298 | 7  |
| G14.6 | 2 | 3 | 1 g | mAUM | Cellulose Membrane | 0.649 | 0.289 | 8  |
| G14.6 | 2 | 3 | 1 g | mAUM | Cellulose Membrane | 0.855 | 0.296 | 9  |
| G14.6 | 2 | 3 | 1 g | mAUM | Cellulose Membrane | 0.689 | 0.269 | 10 |
| G14.6 | 2 | 3 | 1 g | mAUM | Cellulose Membrane | 0.775 | 0.277 | 11 |
| G14.6 | 2 | 3 | 1 g | mAUM | Cellulose Membrane | 0.952 | 0.319 | 12 |
| G14.6 | 2 | 3 | 1 g | mAUM | Cellulose Membrane | 0.761 | 0.31  | 13 |
| G14.6 | 2 | 3 | 1 g | mAUM | Cellulose Membrane | 0.781 | 0.269 | 14 |
| G14.6 | 2 | 3 | 1 g | mAUM | Cellulose Membrane | 0.793 | 0.323 | 15 |
| G14.6 | 2 | 3 | 1 g | mAUM | Cellulose Membrane | 0.879 | 0.285 | 16 |
| G14.6 | 2 | 3 | 1 g | mAUM | Cellulose Membrane | 0.672 | 0.27  | 17 |
| G14.6 | 2 | 3 | 1 g | mAUM | Cellulose Membrane | 0.605 | 0.291 | 18 |
| G14.6 | 2 | 3 | 1 g | mAUM | Cellulose Membrane | 0.978 | 0.29  | 19 |
| G14.6 | 2 | 3 | 1 g | mAUM | Cellulose Membrane | 0.879 | 0.274 | 20 |
| G14.6 | 2 | 3 | 1 g | mAUM | Cellulose Membrane | 0.728 | 0.325 | 21 |
| G14.6 | 2 | 3 | 1 g | mAUM | Cellulose Membrane | 0.923 | 0.331 | 22 |
| G14.6 | 2 | 3 | 1 g | mAUM | Cellulose Membrane | 0.829 | 0.36  | 23 |

|       |   |   |     |      |                    |       |       |    |
|-------|---|---|-----|------|--------------------|-------|-------|----|
| G14.6 | 2 | 3 | 1 g | mAUM | Cellulose Membrane | 0.805 | 0.263 | 24 |
| G14.6 | 2 | 3 | 1 g | mAUM | Cellulose Membrane | 0.804 | 0.312 | 25 |
| G14.7 | 3 | 3 | 1 g | mAUM | Cellulose Membrane | 0.791 | 0.319 | 1  |
| G14.7 | 3 | 3 | 1 g | mAUM | Cellulose Membrane | 0.682 | 0.267 | 2  |
| G14.7 | 3 | 3 | 1 g | mAUM | Cellulose Membrane | 0.88  | 0.379 | 3  |
| G14.7 | 3 | 3 | 1 g | mAUM | Cellulose Membrane | 0.512 | 0.319 | 4  |
| G14.7 | 3 | 3 | 1 g | mAUM | Cellulose Membrane | 0.657 | 0.253 | 5  |
| G14.7 | 3 | 3 | 1 g | mAUM | Cellulose Membrane | 0.788 | 0.321 | 6  |
| G14.7 | 3 | 3 | 1 g | mAUM | Cellulose Membrane | 0.613 | 0.269 | 7  |
| G14.7 | 3 | 3 | 1 g | mAUM | Cellulose Membrane | 0.902 | 0.275 | 8  |
| G14.7 | 3 | 3 | 1 g | mAUM | Cellulose Membrane | 0.617 | 0.311 | 9  |
| G14.7 | 3 | 3 | 1 g | mAUM | Cellulose Membrane | 0.667 | 0.319 | 10 |
| G14.7 | 3 | 3 | 1 g | mAUM | Cellulose Membrane | 0.64  | 0.257 | 11 |
| G14.7 | 3 | 3 | 1 g | mAUM | Cellulose Membrane | 0.681 | 0.296 | 12 |
| G14.7 | 3 | 3 | 1 g | mAUM | Cellulose Membrane | 0.961 | 0.298 | 13 |
| G14.7 | 3 | 3 | 1 g | mAUM | Cellulose Membrane | 0.711 | 0.299 | 14 |
| G14.7 | 3 | 3 | 1 g | mAUM | Cellulose Membrane | 0.905 | 0.254 | 15 |
| G14.7 | 3 | 3 | 1 g | mAUM | Cellulose Membrane | 0.893 | 0.267 | 16 |
| G14.7 | 3 | 3 | 1 g | mAUM | Cellulose Membrane | 0.873 | 0.273 | 17 |
| G14.7 | 3 | 3 | 1 g | mAUM | Cellulose Membrane | 0.851 | 0.297 | 18 |
| G14.7 | 3 | 3 | 1 g | mAUM | Cellulose Membrane | 0.952 | 0.301 | 19 |
| G14.7 | 3 | 3 | 1 g | mAUM | Cellulose Membrane | 0.819 | 0.287 | 20 |
| G14.7 | 3 | 3 | 1 g | mAUM | Cellulose Membrane | 0.894 | 0.313 | 21 |
| G14.7 | 3 | 3 | 1 g | mAUM | Cellulose Membrane | 0.755 | 0.316 | 22 |
| G14.7 | 3 | 3 | 1 g | mAUM | Cellulose Membrane | 0.744 | 0.278 | 23 |

|       |   |   |     |      |                    |       |       |    |
|-------|---|---|-----|------|--------------------|-------|-------|----|
| G14.7 | 3 | 3 | 1 g | mAUM | Cellulose Membrane | 0.937 | 0.334 | 24 |
| G14.7 | 3 | 3 | 1 g | mAUM | Cellulose Membrane | 0.864 | 0.278 | 25 |
| G14.8 | 4 | 3 | 1 g | mAUM | Cellulose Membrane | 0.757 | 0.329 | 1  |
| G14.8 | 4 | 3 | 1 g | mAUM | Cellulose Membrane | 0.84  | 0.333 | 2  |
| G14.8 | 4 | 3 | 1 g | mAUM | Cellulose Membrane | 0.608 | 0.284 | 3  |
| G14.8 | 4 | 3 | 1 g | mAUM | Cellulose Membrane | 0.766 | 0.243 | 4  |
| G14.8 | 4 | 3 | 1 g | mAUM | Cellulose Membrane | 0.82  | 0.282 | 5  |
| G14.8 | 4 | 3 | 1 g | mAUM | Cellulose Membrane | 0.675 | 0.315 | 6  |
| G14.8 | 4 | 3 | 1 g | mAUM | Cellulose Membrane | 0.766 | 0.362 | 7  |
| G14.8 | 4 | 3 | 1 g | mAUM | Cellulose Membrane | 0.867 | 0.369 | 8  |
| G14.8 | 4 | 3 | 1 g | mAUM | Cellulose Membrane | 0.802 | 0.265 | 9  |
| G14.8 | 4 | 3 | 1 g | mAUM | Cellulose Membrane | 0.528 | 0.295 | 10 |
| G14.8 | 4 | 3 | 1 g | mAUM | Cellulose Membrane | 0.666 | 0.266 | 11 |
| G14.8 | 4 | 3 | 1 g | mAUM | Cellulose Membrane | 0.632 | 0.312 | 12 |
| G14.8 | 4 | 3 | 1 g | mAUM | Cellulose Membrane | 0.906 | 0.298 | 13 |
| G14.8 | 4 | 3 | 1 g | mAUM | Cellulose Membrane | 0.847 | 0.312 | 14 |
| G14.8 | 4 | 3 | 1 g | mAUM | Cellulose Membrane | 0.646 | 0.301 | 15 |
| G14.8 | 4 | 3 | 1 g | mAUM | Cellulose Membrane | 0.564 | 0.368 | 16 |
| G14.8 | 4 | 3 | 1 g | mAUM | Cellulose Membrane | 0.76  | 0.301 | 17 |
| G14.8 | 4 | 3 | 1 g | mAUM | Cellulose Membrane | 0.894 | 0.273 | 18 |
| G14.8 | 4 | 3 | 1 g | mAUM | Cellulose Membrane | 0.774 | 0.294 | 19 |
| G14.8 | 4 | 3 | 1 g | mAUM | Cellulose Membrane | 0.904 | 0.29  | 20 |
| G14.8 | 4 | 3 | 1 g | mAUM | Cellulose Membrane | 0.89  | 0.265 | 21 |
| G14.8 | 4 | 3 | 1 g | mAUM | Cellulose Membrane | 0.914 | 0.33  | 22 |
| G14.8 | 4 | 3 | 1 g | mAUM | Cellulose Membrane | 1.203 | 0.252 | 23 |

|       |   |   |     |      |                    |       |       |    |
|-------|---|---|-----|------|--------------------|-------|-------|----|
| G14.8 | 4 | 3 | 1 g | mAUM | Cellulose Membrane | 0.777 | 0.248 | 24 |
| G14.8 | 4 | 3 | 1 g | mAUM | Cellulose Membrane | 0.653 | 0.294 | 25 |
| G15.1 | 1 | 3 | 1 g | mAUM | Silicone           | 1.13  | 0.399 | 1  |
| G15.1 | 1 | 3 | 1 g | mAUM | Silicone           | 0.839 | 0.312 | 2  |
| G15.1 | 1 | 3 | 1 g | mAUM | Silicone           | 0.803 | 0.268 | 3  |
| G15.1 | 1 | 3 | 1 g | mAUM | Silicone           | 0.856 | 0.324 | 4  |
| G15.1 | 1 | 3 | 1 g | mAUM | Silicone           | 0.685 | 0.315 | 5  |
| G15.1 | 1 | 3 | 1 g | mAUM | Silicone           | 0.893 | 0.294 | 6  |
| G15.1 | 1 | 3 | 1 g | mAUM | Silicone           | 0.791 | 0.284 | 7  |
| G15.1 | 1 | 3 | 1 g | mAUM | Silicone           | 0.784 | 0.347 | 8  |
| G15.1 | 1 | 3 | 1 g | mAUM | Silicone           | 1.047 | 0.335 | 9  |
| G15.1 | 1 | 3 | 1 g | mAUM | Silicone           | 0.955 | 0.347 | 10 |
| G15.1 | 1 | 3 | 1 g | mAUM | Silicone           | 1.13  | 0.348 | 11 |
| G15.1 | 1 | 3 | 1 g | mAUM | Silicone           | 1.1   | 0.342 | 12 |
| G15.1 | 1 | 3 | 1 g | mAUM | Silicone           | 1.166 | 0.321 | 13 |
| G15.1 | 1 | 3 | 1 g | mAUM | Silicone           | 1.004 | 0.347 | 14 |
| G15.1 | 1 | 3 | 1 g | mAUM | Silicone           | 1.232 | 0.339 | 15 |
| G15.1 | 1 | 3 | 1 g | mAUM | Silicone           | 0.727 | 0.339 | 16 |
| G15.1 | 1 | 3 | 1 g | mAUM | Silicone           | 0.882 | 0.336 | 17 |
| G15.1 | 1 | 3 | 1 g | mAUM | Silicone           | 0.758 | 0.362 | 18 |
| G15.1 | 1 | 3 | 1 g | mAUM | Silicone           | 0.997 | 0.249 | 19 |
| G15.1 | 1 | 3 | 1 g | mAUM | Silicone           | 0.821 | 0.286 | 20 |
| G15.1 | 1 | 3 | 1 g | mAUM | Silicone           | 0.728 | 0.32  | 21 |
| G15.1 | 1 | 3 | 1 g | mAUM | Silicone           | 0.75  | 0.36  | 22 |
| G15.1 | 1 | 3 | 1 g | mAUM | Silicone           | 0.871 | 0.313 | 23 |
| G15.1 | 1 | 3 | 1 g | mAUM | Silicone           | 0.731 | 0.332 | 24 |
| G15.1 | 1 | 3 | 1 g | mAUM | Silicone           | 0.91  | 0.319 | 25 |
| G15.2 | 2 | 3 | 1 g | mAUM | Silicone           | 0.751 | 0.335 | 1  |
| G15.2 | 2 | 3 | 1 g | mAUM | Silicone           | 0.71  | 0.297 | 2  |
| G15.2 | 2 | 3 | 1 g | mAUM | Silicone           | 0.707 | 0.325 | 3  |
| G15.2 | 2 | 3 | 1 g | mAUM | Silicone           | 0.884 | 0.348 | 4  |
| G15.2 | 2 | 3 | 1 g | mAUM | Silicone           | 0.616 | 0.307 | 5  |
| G15.2 | 2 | 3 | 1 g | mAUM | Silicone           | 0.922 | 0.322 | 6  |
| G15.2 | 2 | 3 | 1 g | mAUM | Silicone           | 0.723 | 0.368 | 7  |
| G15.2 | 2 | 3 | 1 g | mAUM | Silicone           | 0.839 | 0.316 | 8  |
| G15.2 | 2 | 3 | 1 g | mAUM | Silicone           | 1.055 | 0.335 | 9  |
| G15.2 | 2 | 3 | 1 g | mAUM | Silicone           | 0.955 | 0.338 | 10 |
| G15.2 | 2 | 3 | 1 g | mAUM | Silicone           | 0.973 | 0.343 | 11 |
| G15.2 | 2 | 3 | 1 g | mAUM | Silicone           | 0.773 | 0.318 | 12 |
| G15.2 | 2 | 3 | 1 g | mAUM | Silicone           | 1.157 | 0.378 | 13 |
| G15.2 | 2 | 3 | 1 g | mAUM | Silicone           | 0.881 | 0.335 | 14 |
| G15.2 | 2 | 3 | 1 g | mAUM | Silicone           | 0.811 | 0.336 | 15 |
| G15.2 | 2 | 3 | 1 g | mAUM | Silicone           | 0.806 | 0.348 | 16 |
| G15.2 | 2 | 3 | 1 g | mAUM | Silicone           | 0.79  | 0.415 | 17 |
| G15.2 | 2 | 3 | 1 g | mAUM | Silicone           | 0.76  | 0.33  | 18 |
| G15.2 | 2 | 3 | 1 g | mAUM | Silicone           | 0.637 | 0.284 | 19 |
| G15.2 | 2 | 3 | 1 g | mAUM | Silicone           | 0.83  | 0.321 | 20 |
| G15.2 | 2 | 3 | 1 g | mAUM | Silicone           | 0.659 | 0.354 | 21 |

|       |   |   |     |      |          |       |       |    |
|-------|---|---|-----|------|----------|-------|-------|----|
| G15.2 | 2 | 3 | 1 g | mAUM | Silicone | 0.967 | 0.322 | 22 |
| G15.2 | 2 | 3 | 1 g | mAUM | Silicone | 1.011 | 0.373 | 23 |
| G15.2 | 2 | 3 | 1 g | mAUM | Silicone | 0.961 | 0.328 | 24 |
| G15.2 | 2 | 3 | 1 g | mAUM | Silicone | 1.017 | 0.335 | 25 |
| G15.3 | 3 | 3 | 1 g | mAUM | Silicone | 0.722 | 0.308 | 1  |
| G15.3 | 3 | 3 | 1 g | mAUM | Silicone | 0.682 | 0.332 | 2  |
| G15.3 | 3 | 3 | 1 g | mAUM | Silicone | 0.69  | 0.35  | 3  |
| G15.3 | 3 | 3 | 1 g | mAUM | Silicone | 0.889 | 0.329 | 4  |
| G15.3 | 3 | 3 | 1 g | mAUM | Silicone | 0.949 | 0.384 | 5  |
| G15.3 | 3 | 3 | 1 g | mAUM | Silicone | 0.845 | 0.309 | 6  |
| G15.3 | 3 | 3 | 1 g | mAUM | Silicone | 0.749 | 0.328 | 7  |
| G15.3 | 3 | 3 | 1 g | mAUM | Silicone | 0.8   | 0.354 | 8  |
| G15.3 | 3 | 3 | 1 g | mAUM | Silicone | 0.752 | 0.302 | 9  |
| G15.3 | 3 | 3 | 1 g | mAUM | Silicone | 1.054 | 0.379 | 10 |
| G15.3 | 3 | 3 | 1 g | mAUM | Silicone | 1.064 | 0.317 | 11 |
| G15.3 | 3 | 3 | 1 g | mAUM | Silicone | 0.899 | 0.342 | 12 |
| G15.3 | 3 | 3 | 1 g | mAUM | Silicone | 0.685 | 0.332 | 13 |
| G15.3 | 3 | 3 | 1 g | mAUM | Silicone | 0.99  | 0.34  | 14 |
| G15.3 | 3 | 3 | 1 g | mAUM | Silicone | 0.85  | 0.312 | 15 |
| G15.3 | 3 | 3 | 1 g | mAUM | Silicone | 0.873 | 0.353 | 16 |
| G15.3 | 3 | 3 | 1 g | mAUM | Silicone | 0.707 | 0.311 | 17 |
| G15.3 | 3 | 3 | 1 g | mAUM | Silicone | 0.926 | 0.337 | 18 |
| G15.3 | 3 | 3 | 1 g | mAUM | Silicone | 0.564 | 0.305 | 19 |
| G15.3 | 3 | 3 | 1 g | mAUM | Silicone | 0.841 | 0.35  | 20 |
| G15.3 | 3 | 3 | 1 g | mAUM | Silicone | 0.839 | 0.375 | 21 |
| G15.3 | 3 | 3 | 1 g | mAUM | Silicone | 0.804 | 0.283 | 22 |
| G15.3 | 3 | 3 | 1 g | mAUM | Silicone | 0.66  | 0.4   | 23 |
| G15.3 | 3 | 3 | 1 g | mAUM | Silicone | 0.863 | 0.405 | 24 |
| G15.3 | 3 | 3 | 1 g | mAUM | Silicone | 0.921 | 0.305 | 25 |
| G15.4 | 4 | 3 | 1 g | mAUM | Silicone | 0.821 | 0.301 | 1  |
| G15.4 | 4 | 3 | 1 g | mAUM | Silicone | 0.718 | 0.305 | 2  |
| G15.4 | 4 | 3 | 1 g | mAUM | Silicone | 0.682 | 0.365 | 3  |
| G15.4 | 4 | 3 | 1 g | mAUM | Silicone | 0.688 | 0.38  | 4  |
| G15.4 | 4 | 3 | 1 g | mAUM | Silicone | 0.735 | 0.313 | 5  |
| G15.4 | 4 | 3 | 1 g | mAUM | Silicone | 0.738 | 0.269 | 6  |
| G15.4 | 4 | 3 | 1 g | mAUM | Silicone | 0.864 | 0.315 | 7  |
| G15.4 | 4 | 3 | 1 g | mAUM | Silicone | 0.746 | 0.335 | 8  |
| G15.4 | 4 | 3 | 1 g | mAUM | Silicone | 0.724 | 0.319 | 9  |
| G15.4 | 4 | 3 | 1 g | mAUM | Silicone | 0.726 | 0.314 | 10 |
| G15.4 | 4 | 3 | 1 g | mAUM | Silicone | 0.699 | 0.331 | 11 |
| G15.4 | 4 | 3 | 1 g | mAUM | Silicone | 0.753 | 0.277 | 12 |
| G15.4 | 4 | 3 | 1 g | mAUM | Silicone | 0.819 | 0.341 | 13 |
| G15.4 | 4 | 3 | 1 g | mAUM | Silicone | 0.632 | 0.332 | 14 |
| G15.4 | 4 | 3 | 1 g | mAUM | Silicone | 0.706 | 0.377 | 15 |
| G15.4 | 4 | 3 | 1 g | mAUM | Silicone | 0.692 | 0.339 | 16 |
| G15.4 | 4 | 3 | 1 g | mAUM | Silicone | 0.814 | 0.369 | 17 |
| G15.4 | 4 | 3 | 1 g | mAUM | Silicone | 0.888 | 0.356 | 18 |
| G15.4 | 4 | 3 | 1 g | mAUM | Silicone | 0.897 | 0.318 | 19 |
| G15.4 | 4 | 3 | 1 g | mAUM | Silicone | 0.675 | 0.303 | 20 |
| G15.4 | 4 | 3 | 1 g | mAUM | Silicone | 0.741 | 0.348 | 21 |

|       |   |   |     |      |               |       |       |    |
|-------|---|---|-----|------|---------------|-------|-------|----|
| G15.4 | 4 | 3 | 1 g | mAUM | Silicone      | 0.611 | 0.328 | 22 |
| G15.4 | 4 | 3 | 1 g | mAUM | Silicone      | 0.748 | 0.336 | 23 |
| G15.4 | 4 | 3 | 1 g | mAUM | Silicone      | 0.704 | 0.368 | 24 |
| G15.4 | 4 | 3 | 1 g | mAUM | Silicone      | 0.747 | 0.367 | 25 |
| G15.5 | 1 | 3 | 1 g | mAUM | Silicone-DLIP | 1.146 | 0.439 | 1  |
| G15.5 | 1 | 3 | 1 g | mAUM | Silicone-DLIP | 0.833 | 0.519 | 2  |
| G15.5 | 1 | 3 | 1 g | mAUM | Silicone-DLIP | 0.981 | 0.531 | 3  |
| G15.5 | 1 | 3 | 1 g | mAUM | Silicone-DLIP | 0.861 | 0.48  | 4  |
| G15.5 | 1 | 3 | 1 g | mAUM | Silicone-DLIP | 1.531 | 0.539 | 5  |
| G15.5 | 1 | 3 | 1 g | mAUM | Silicone-DLIP | 1.179 | 0.473 | 6  |
| G15.5 | 1 | 3 | 1 g | mAUM | Silicone-DLIP | 1.62  | 0.495 | 7  |
| G15.5 | 1 | 3 | 1 g | mAUM | Silicone-DLIP | 1.341 | 0.472 | 8  |
| G15.5 | 1 | 3 | 1 g | mAUM | Silicone-DLIP | 1.122 | 0.5   | 9  |
| G15.5 | 1 | 3 | 1 g | mAUM | Silicone-DLIP | 1.181 | 0.513 | 10 |
| G15.5 | 1 | 3 | 1 g | mAUM | Silicone-DLIP | 0.785 | 0.507 | 11 |
| G15.5 | 1 | 3 | 1 g | mAUM | Silicone-DLIP | 1.368 | 0.519 | 12 |
| G15.5 | 1 | 3 | 1 g | mAUM | Silicone-DLIP | 1.242 | 0.483 | 13 |
| G15.5 | 1 | 3 | 1 g | mAUM | Silicone-DLIP | 0.939 | 0.482 | 14 |
| G15.5 | 1 | 3 | 1 g | mAUM | Silicone-DLIP | 1.252 | 0.545 | 15 |
| G15.5 | 1 | 3 | 1 g | mAUM | Silicone-DLIP | 1.283 | 0.56  | 16 |
| G15.5 | 1 | 3 | 1 g | mAUM | Silicone-DLIP | 1.091 | 0.478 | 17 |
| G15.5 | 1 | 3 | 1 g | mAUM | Silicone-DLIP | 1.36  | 0.442 | 18 |
| G15.5 | 1 | 3 | 1 g | mAUM | Silicone-DLIP | 1.174 | 0.467 | 19 |
| G15.5 | 1 | 3 | 1 g | mAUM | Silicone-DLIP | 0.879 | 0.577 | 20 |
| G15.5 | 1 | 3 | 1 g | mAUM | Silicone-DLIP | 1.352 | 0.472 | 21 |
| G15.5 | 1 | 3 | 1 g | mAUM | Silicone-DLIP | 1.513 | 0.528 | 22 |
| G15.5 | 1 | 3 | 1 g | mAUM | Silicone-DLIP | 1.261 | 0.427 | 23 |
| G15.5 | 1 | 3 | 1 g | mAUM | Silicone-DLIP | 1.505 | 0.429 | 24 |
| G15.5 | 1 | 3 | 1 g | mAUM | Silicone-DLIP | 1.34  | 0.417 | 25 |
| G15.6 | 2 | 3 | 1 g | mAUM | Silicone-DLIP | 0.929 | 0.55  | 1  |
| G15.6 | 2 | 3 | 1 g | mAUM | Silicone-DLIP | 1.024 | 0.585 | 2  |
| G15.6 | 2 | 3 | 1 g | mAUM | Silicone-DLIP | 1.019 | 0.453 | 3  |
| G15.6 | 2 | 3 | 1 g | mAUM | Silicone-DLIP | 1.122 | 0.49  | 4  |
| G15.6 | 2 | 3 | 1 g | mAUM | Silicone-DLIP | 1.03  | 0.358 | 5  |
| G15.6 | 2 | 3 | 1 g | mAUM | Silicone-DLIP | 1.432 | 0.441 | 6  |
| G15.6 | 2 | 3 | 1 g | mAUM | Silicone-DLIP | 1.586 | 0.406 | 7  |
| G15.6 | 2 | 3 | 1 g | mAUM | Silicone-DLIP | 1.339 | 0.359 | 8  |
| G15.6 | 2 | 3 | 1 g | mAUM | Silicone-DLIP | 1.184 | 0.506 | 9  |
| G15.6 | 2 | 3 | 1 g | mAUM | Silicone-DLIP | 1.23  | 0.481 | 10 |
| G15.6 | 2 | 3 | 1 g | mAUM | Silicone-DLIP | 1.411 | 0.501 | 11 |
| G15.6 | 2 | 3 | 1 g | mAUM | Silicone-DLIP | 1.198 | 0.473 | 12 |
| G15.6 | 2 | 3 | 1 g | mAUM | Silicone-DLIP | 0.828 | 0.507 | 13 |
| G15.6 | 2 | 3 | 1 g | mAUM | Silicone-DLIP | 1.012 | 0.473 | 14 |
| G15.6 | 2 | 3 | 1 g | mAUM | Silicone-DLIP | 1.139 | 0.408 | 15 |
| G15.6 | 2 | 3 | 1 g | mAUM | Silicone-DLIP | 1.139 | 0.404 | 16 |
| G15.6 | 2 | 3 | 1 g | mAUM | Silicone-DLIP | 1.19  | 0.441 | 17 |
| G15.6 | 2 | 3 | 1 g | mAUM | Silicone-DLIP | 1.242 | 0.447 | 18 |
| G15.6 | 2 | 3 | 1 g | mAUM | Silicone-DLIP | 1.334 | 0.44  | 19 |
| G15.6 | 2 | 3 | 1 g | mAUM | Silicone-DLIP | 0.8   | 0.483 | 20 |
| G15.6 | 2 | 3 | 1 g | mAUM | Silicone-DLIP | 1.067 | 0.546 | 21 |

|       |   |   |     |      |               |       |       |    |
|-------|---|---|-----|------|---------------|-------|-------|----|
| G15.6 | 2 | 3 | 1 g | mAUM | Silicone-DLIP | 1.143 | 0.552 | 22 |
| G15.6 | 2 | 3 | 1 g | mAUM | Silicone-DLIP | 0.905 | 0.5   | 23 |
| G15.6 | 2 | 3 | 1 g | mAUM | Silicone-DLIP | 1.059 | 0.467 | 24 |
| G15.6 | 2 | 3 | 1 g | mAUM | Silicone-DLIP | 0.921 | 0.54  | 25 |
| G15.7 | 3 | 3 | 1 g | mAUM | Silicone-DLIP | 1.075 | 0.512 | 1  |
| G15.7 | 3 | 3 | 1 g | mAUM | Silicone-DLIP | 0.863 | 0.488 | 2  |
| G15.7 | 3 | 3 | 1 g | mAUM | Silicone-DLIP | 1.404 | 0.495 | 3  |
| G15.7 | 3 | 3 | 1 g | mAUM | Silicone-DLIP | 1.315 | 0.564 | 4  |
| G15.7 | 3 | 3 | 1 g | mAUM | Silicone-DLIP | 1.075 | 0.449 | 5  |
| G15.7 | 3 | 3 | 1 g | mAUM | Silicone-DLIP | 1.156 | 0.51  | 6  |
| G15.7 | 3 | 3 | 1 g | mAUM | Silicone-DLIP | 0.985 | 0.5   | 7  |
| G15.7 | 3 | 3 | 1 g | mAUM | Silicone-DLIP | 1.047 | 0.433 | 8  |
| G15.7 | 3 | 3 | 1 g | mAUM | Silicone-DLIP | 1.085 | 0.483 | 9  |
| G15.7 | 3 | 3 | 1 g | mAUM | Silicone-DLIP | 1.07  | 0.474 | 10 |
| G15.7 | 3 | 3 | 1 g | mAUM | Silicone-DLIP | 0.995 | 0.428 | 11 |
| G15.7 | 3 | 3 | 1 g | mAUM | Silicone-DLIP | 1.051 | 0.508 | 12 |
| G15.7 | 3 | 3 | 1 g | mAUM | Silicone-DLIP | 0.874 | 0.456 | 13 |
| G15.7 | 3 | 3 | 1 g | mAUM | Silicone-DLIP | 1.04  | 0.573 | 14 |
| G15.7 | 3 | 3 | 1 g | mAUM | Silicone-DLIP | 1.01  | 0.532 | 15 |
| G15.7 | 3 | 3 | 1 g | mAUM | Silicone-DLIP | 0.948 | 0.588 | 16 |
| G15.7 | 3 | 3 | 1 g | mAUM | Silicone-DLIP | 1.095 | 0.523 | 17 |
| G15.7 | 3 | 3 | 1 g | mAUM | Silicone-DLIP | 1.106 | 0.443 | 18 |
| G15.7 | 3 | 3 | 1 g | mAUM | Silicone-DLIP | 1.149 | 0.457 | 19 |
| G15.7 | 3 | 3 | 1 g | mAUM | Silicone-DLIP | 1.08  | 0.585 | 20 |
| G15.7 | 3 | 3 | 1 g | mAUM | Silicone-DLIP | 1.112 | 0.49  | 21 |
| G15.7 | 3 | 3 | 1 g | mAUM | Silicone-DLIP | 1.221 | 0.467 | 22 |
| G15.7 | 3 | 3 | 1 g | mAUM | Silicone-DLIP | 1.201 | 0.54  | 23 |
| G15.7 | 3 | 3 | 1 g | mAUM | Silicone-DLIP | 0.982 | 0.5   | 24 |
| G15.7 | 3 | 3 | 1 g | mAUM | Silicone-DLIP | 1     | 0.5   | 25 |
| G15.8 | 4 | 3 | 1 g | mAUM | Silicone-DLIP | 1.36  | 0.4   | 1  |
| G15.8 | 4 | 3 | 1 g | mAUM | Silicone-DLIP | 1.06  | 0.433 | 2  |
| G15.8 | 4 | 3 | 1 g | mAUM | Silicone-DLIP | 0.959 | 0.492 | 3  |
| G15.8 | 4 | 3 | 1 g | mAUM | Silicone-DLIP | 0.933 | 0.416 | 4  |
| G15.8 | 4 | 3 | 1 g | mAUM | Silicone-DLIP | 0.856 | 0.577 | 5  |
| G15.8 | 4 | 3 | 1 g | mAUM | Silicone-DLIP | 0.868 | 0.453 | 6  |
| G15.8 | 4 | 3 | 1 g | mAUM | Silicone-DLIP | 0.891 | 0.492 | 7  |
| G15.8 | 4 | 3 | 1 g | mAUM | Silicone-DLIP | 0.948 | 0.534 | 8  |
| G15.8 | 4 | 3 | 1 g | mAUM | Silicone-DLIP | 1.032 | 0.534 | 9  |
| G15.8 | 4 | 3 | 1 g | mAUM | Silicone-DLIP | 1.107 | 0.48  | 10 |
| G15.8 | 4 | 3 | 1 g | mAUM | Silicone-DLIP | 0.973 | 0.508 | 11 |
| G15.8 | 4 | 3 | 1 g | mAUM | Silicone-DLIP | 1.248 | 0.537 | 12 |
| G15.8 | 4 | 3 | 1 g | mAUM | Silicone-DLIP | 1.294 | 0.489 | 13 |
| G15.8 | 4 | 3 | 1 g | mAUM | Silicone-DLIP | 1.144 | 0.496 | 14 |
| G15.8 | 4 | 3 | 1 g | mAUM | Silicone-DLIP | 1.065 | 0.521 | 15 |
| G15.8 | 4 | 3 | 1 g | mAUM | Silicone-DLIP | 1.086 | 0.538 | 16 |
| G15.8 | 4 | 3 | 1 g | mAUM | Silicone-DLIP | 1.266 | 0.488 | 17 |
| G15.8 | 4 | 3 | 1 g | mAUM | Silicone-DLIP | 0.984 | 0.379 | 18 |
| G15.8 | 4 | 3 | 1 g | mAUM | Silicone-DLIP | 1.171 | 0.406 | 19 |
| G15.8 | 4 | 3 | 1 g | mAUM | Silicone-DLIP | 1.021 | 0.553 | 20 |
| G15.8 | 4 | 3 | 1 g | mAUM | Silicone-DLIP | 1.376 | 0.514 | 21 |

|       |   |   |     |      |                    |       |       |    |
|-------|---|---|-----|------|--------------------|-------|-------|----|
| G15.8 | 4 | 3 | 1 g | mAUM | Silicone-DLIP      | 1.348 | 0.564 | 22 |
| G15.8 | 4 | 3 | 1 g | mAUM | Silicone-DLIP      | 1.021 | 0.528 | 23 |
| G15.8 | 4 | 3 | 1 g | mAUM | Silicone-DLIP      | 1.097 | 0.374 | 24 |
| G15.8 | 4 | 3 | 1 g | mAUM | Silicone-DLIP      | 0.928 | 0.392 | 25 |
| 2.5   | 1 | 1 | µg  | mAUM | Cellulose Membrane | 1.187 | 0.467 | 1  |
| 2.5   | 1 | 1 | µg  | mAUM | Cellulose Membrane | 1.159 | 0.481 | 2  |
| 2.5   | 1 | 1 | µg  | mAUM | Cellulose Membrane | 1.101 | 0.457 | 3  |
| 2.5   | 1 | 1 | µg  | mAUM | Cellulose Membrane | 1.149 | 0.416 | 4  |
| 2.5   | 1 | 1 | µg  | mAUM | Cellulose Membrane | 1.101 | 0.531 | 5  |
| 2.5   | 1 | 1 | µg  | mAUM | Cellulose Membrane | 1.244 | 0.485 | 6  |
| 2.5   | 1 | 1 | µg  | mAUM | Cellulose Membrane | 1.143 | 0.475 | 7  |
| 2.5   | 1 | 1 | µg  | mAUM | Cellulose Membrane | 0.979 | 0.609 | 8  |
| 2.5   | 1 | 1 | µg  | mAUM | Cellulose Membrane | 1.195 | 0.512 | 9  |
| 2.5   | 1 | 1 | µg  | mAUM | Cellulose Membrane | 1.205 | 0.402 | 10 |
| 2.5   | 1 | 1 | µg  | mAUM | Cellulose Membrane | 0.985 | 0.425 | 11 |
| 2.5   | 1 | 1 | µg  | mAUM | Cellulose Membrane | 1.187 | 0.542 | 12 |
| 2.5   | 1 | 1 | µg  | mAUM | Cellulose Membrane | 1.03  | 0.551 | 13 |
| 2.5   | 1 | 1 | µg  | mAUM | Cellulose Membrane | 0.976 | 0.506 | 14 |
| 2.5   | 1 | 1 | µg  | mAUM | Cellulose Membrane | 1.14  | 0.488 | 15 |
| 2.5   | 1 | 1 | µg  | mAUM | Cellulose Membrane | 1.201 | 0.432 | 16 |
| 2.5   | 1 | 1 | µg  | mAUM | Cellulose Membrane | 1.134 | 0.502 | 17 |
| 2.5   | 1 | 1 | µg  | mAUM | Cellulose Membrane | 1.024 | 0.469 | 18 |
| 2.5   | 1 | 1 | µg  | mAUM | Cellulose Membrane | 1.161 | 0.287 | 19 |
| 2.5   | 1 | 1 | µg  | mAUM | Cellulose Membrane | 0.938 | 0.342 | 20 |
| 2.5   | 1 | 1 | µg  | mAUM | Cellulose Membrane | 1.262 | 0.327 | 21 |
| 2.5   | 1 | 1 | µg  | mAUM | Cellulose Membrane | 0.781 | 0.298 | 22 |
| 2.5   | 1 | 1 | µg  | mAUM | Cellulose Membrane | 0.855 | 0.319 | 23 |

|     |   |   |    |      |                    |       |       |    |
|-----|---|---|----|------|--------------------|-------|-------|----|
| 2.5 | 1 | 1 | µg | mAUM | Cellulose Membrane | 1.096 | 0.334 | 24 |
| 2.5 | 1 | 1 | µg | mAUM | Cellulose Membrane | 0.976 | 0.315 | 25 |
| 2.6 | 2 | 1 | µg | mAUM | Cellulose Membrane | 0.831 | 0.218 | 1  |
| 2.6 | 2 | 1 | µg | mAUM | Cellulose Membrane | 0.861 | 0.319 | 2  |
| 2.6 | 2 | 1 | µg | mAUM | Cellulose Membrane | 0.852 | 0.25  | 3  |
| 2.6 | 2 | 1 | µg | mAUM | Cellulose Membrane | 0.611 | 0.29  | 4  |
| 2.6 | 2 | 1 | µg | mAUM | Cellulose Membrane | 0.873 | 0.225 | 5  |
| 2.6 | 2 | 1 | µg | mAUM | Cellulose Membrane | 0.749 | 0.299 | 6  |
| 2.6 | 2 | 1 | µg | mAUM | Cellulose Membrane | 1.123 | 0.31  | 7  |
| 2.6 | 2 | 1 | µg | mAUM | Cellulose Membrane | 1.074 | 0.265 | 8  |
| 2.6 | 2 | 1 | µg | mAUM | Cellulose Membrane | 0.635 | 0.265 | 9  |
| 2.6 | 2 | 1 | µg | mAUM | Cellulose Membrane | 0.668 | 0.281 | 10 |
| 2.6 | 2 | 1 | µg | mAUM | Cellulose Membrane | 0.627 | 0.249 | 11 |
| 2.6 | 2 | 1 | µg | mAUM | Cellulose Membrane | 0.392 | 0.311 | 12 |
| 2.6 | 2 | 1 | µg | mAUM | Cellulose Membrane | 0.694 | 0.285 | 13 |
| 2.6 | 2 | 1 | µg | mAUM | Cellulose Membrane | 0.6   | 0.262 | 14 |
| 2.6 | 2 | 1 | µg | mAUM | Cellulose Membrane | 0.663 | 0.237 | 15 |
| 2.6 | 2 | 1 | µg | mAUM | Cellulose Membrane | 0.823 | 0.262 | 16 |
| 2.6 | 2 | 1 | µg | mAUM | Cellulose Membrane | 1.085 | 0.161 | 17 |
| 2.6 | 2 | 1 | µg | mAUM | Cellulose Membrane | 0.661 | 0.339 | 18 |
| 2.6 | 2 | 1 | µg | mAUM | Cellulose Membrane | 0.433 | 0.257 | 19 |
| 2.6 | 2 | 1 | µg | mAUM | Cellulose Membrane | 0.72  | 0.281 | 20 |
| 2.6 | 2 | 1 | µg | mAUM | Cellulose Membrane | 0.819 | 0.217 | 21 |
| 2.6 | 2 | 1 | µg | mAUM | Cellulose Membrane | 0.592 | 0.266 | 22 |
| 2.6 | 2 | 1 | µg | mAUM | Cellulose Membrane | 0.601 | 0.254 | 23 |

|     |   |   |    |      |                    |       |       |    |
|-----|---|---|----|------|--------------------|-------|-------|----|
| 2.6 | 2 | 1 | µg | mAUM | Cellulose Membrane | 0.687 | 0.257 | 24 |
| 2.6 | 2 | 1 | µg | mAUM | Cellulose Membrane | 0.532 | 0.237 | 25 |
| 2.7 | 3 | 1 | µg | mAUM | Cellulose Membrane | 0.492 | 0.299 | 1  |
| 2.7 | 3 | 1 | µg | mAUM | Cellulose Membrane | 0.879 | 0.309 | 2  |
| 2.7 | 3 | 1 | µg | mAUM | Cellulose Membrane | 0.508 | 0.299 | 3  |
| 2.7 | 3 | 1 | µg | mAUM | Cellulose Membrane | 0.889 | 0.276 | 4  |
| 2.7 | 3 | 1 | µg | mAUM | Cellulose Membrane | 0.592 | 0.305 | 5  |
| 2.7 | 3 | 1 | µg | mAUM | Cellulose Membrane | 0.868 | 0.346 | 6  |
| 2.7 | 3 | 1 | µg | mAUM | Cellulose Membrane | 0.926 | 0.197 | 7  |
| 2.7 | 3 | 1 | µg | mAUM | Cellulose Membrane | 0.672 | 0.231 | 8  |
| 2.7 | 3 | 1 | µg | mAUM | Cellulose Membrane | 0.732 | 0.302 | 9  |
| 2.7 | 3 | 1 | µg | mAUM | Cellulose Membrane | 0.596 | 0.225 | 10 |
| 2.7 | 3 | 1 | µg | mAUM | Cellulose Membrane | 0.44  | 0.348 | 11 |
| 2.7 | 3 | 1 | µg | mAUM | Cellulose Membrane | 0.804 | 0.261 | 12 |
| 2.7 | 3 | 1 | µg | mAUM | Cellulose Membrane | 0.587 | 0.322 | 13 |
| 2.7 | 3 | 1 | µg | mAUM | Cellulose Membrane | 0.558 | 0.352 | 14 |
| 2.7 | 3 | 1 | µg | mAUM | Cellulose Membrane | 0.62  | 0.321 | 15 |
| 2.7 | 3 | 1 | µg | mAUM | Cellulose Membrane | 0.787 | 0.328 | 16 |
| 2.7 | 3 | 1 | µg | mAUM | Cellulose Membrane | 0.551 | 0.247 | 17 |
| 2.7 | 3 | 1 | µg | mAUM | Cellulose Membrane | 0.521 | 0.339 | 18 |
| 2.7 | 3 | 1 | µg | mAUM | Cellulose Membrane | 0.462 | 0.24  | 19 |
| 2.7 | 3 | 1 | µg | mAUM | Cellulose Membrane | 0.457 | 0.226 | 20 |
| 2.7 | 3 | 1 | µg | mAUM | Cellulose Membrane | 0.749 | 0.36  | 21 |
| 2.7 | 3 | 1 | µg | mAUM | Cellulose Membrane | 0.495 | 0.334 | 22 |
| 2.7 | 3 | 1 | µg | mAUM | Cellulose Membrane | 0.688 | 0.331 | 23 |

|     |   |   |    |      |                    |       |       |    |
|-----|---|---|----|------|--------------------|-------|-------|----|
| 2.7 | 3 | 1 | µg | mAUM | Cellulose Membrane | 0.76  | 0.372 | 24 |
| 2.7 | 3 | 1 | µg | mAUM | Cellulose Membrane | 0.685 | 0.26  | 25 |
| 2.8 | 4 | 1 | µg | mAUM | Cellulose Membrane | 0.776 | 0.262 | 1  |
| 2.8 | 4 | 1 | µg | mAUM | Cellulose Membrane | 0.725 | 0.28  | 2  |
| 2.8 | 4 | 1 | µg | mAUM | Cellulose Membrane | 0.765 | 0.234 | 3  |
| 2.8 | 4 | 1 | µg | mAUM | Cellulose Membrane | 0.681 | 0.277 | 4  |
| 2.8 | 4 | 1 | µg | mAUM | Cellulose Membrane | 0.692 | 0.249 | 5  |
| 2.8 | 4 | 1 | µg | mAUM | Cellulose Membrane | 0.782 | 0.291 | 6  |
| 2.8 | 4 | 1 | µg | mAUM | Cellulose Membrane | 0.757 | 0.25  | 7  |
| 2.8 | 4 | 1 | µg | mAUM | Cellulose Membrane | 0.722 | 0.271 | 8  |
| 2.8 | 4 | 1 | µg | mAUM | Cellulose Membrane | 0.668 | 0.273 | 9  |
| 2.8 | 4 | 1 | µg | mAUM | Cellulose Membrane | 0.782 | 0.268 | 10 |
| 2.8 | 4 | 1 | µg | mAUM | Cellulose Membrane | 0.729 | 0.244 | 11 |
| 2.8 | 4 | 1 | µg | mAUM | Cellulose Membrane | 0.752 | 0.297 | 12 |
| 2.8 | 4 | 1 | µg | mAUM | Cellulose Membrane | 0.699 | 0.25  | 13 |
| 2.8 | 4 | 1 | µg | mAUM | Cellulose Membrane | 0.774 | 0.311 | 14 |
| 2.8 | 4 | 1 | µg | mAUM | Cellulose Membrane | 0.822 | 0.305 | 15 |
| 2.8 | 4 | 1 | µg | mAUM | Cellulose Membrane | 0.776 | 0.343 | 16 |
| 2.8 | 4 | 1 | µg | mAUM | Cellulose Membrane | 0.876 | 0.327 | 17 |
| 2.8 | 4 | 1 | µg | mAUM | Cellulose Membrane | 0.726 | 0.309 | 18 |
| 2.8 | 4 | 1 | µg | mAUM | Cellulose Membrane | 0.58  | 0.265 | 19 |
| 2.8 | 4 | 1 | µg | mAUM | Cellulose Membrane | 0.985 | 0.237 | 20 |
| 2.8 | 4 | 1 | µg | mAUM | Cellulose Membrane | 0.841 | 0.244 | 21 |
| 2.8 | 4 | 1 | µg | mAUM | Cellulose Membrane | 0.752 | 0.306 | 22 |
| 2.8 | 4 | 1 | µg | mAUM | Cellulose Membrane | 0.923 | 0.347 | 23 |

|     |   |   |    |      |                    |       |       |    |
|-----|---|---|----|------|--------------------|-------|-------|----|
| 2.8 | 4 | 1 | µg | mAUM | Cellulose Membrane | 0.98  | 0.304 | 24 |
| 2.8 | 4 | 1 | µg | mAUM | Cellulose Membrane | 0.824 | 0.378 | 25 |
| 3.1 | 1 | 1 | µg | mAUM | Silicone           | 0.628 | 0.366 | 1  |
| 3.1 | 1 | 1 | µg | mAUM | Silicone           | 0.699 | 0.315 | 2  |
| 3.1 | 1 | 1 | µg | mAUM | Silicone           | 0.556 | 0.388 | 3  |
| 3.1 | 1 | 1 | µg | mAUM | Silicone           | 0.744 | 0.314 | 4  |
| 3.1 | 1 | 1 | µg | mAUM | Silicone           | 0.95  | 0.331 | 5  |
| 3.1 | 1 | 1 | µg | mAUM | Silicone           | 0.878 | 0.38  | 6  |
| 3.1 | 1 | 1 | µg | mAUM | Silicone           | 1.018 | 0.343 | 7  |
| 3.1 | 1 | 1 | µg | mAUM | Silicone           | 0.793 | 0.336 | 8  |
| 3.1 | 1 | 1 | µg | mAUM | Silicone           | 0.95  | 0.329 | 9  |
| 3.1 | 1 | 1 | µg | mAUM | Silicone           | 0.661 | 0.369 | 10 |
| 3.1 | 1 | 1 | µg | mAUM | Silicone           | 0.834 | 0.381 | 11 |
| 3.1 | 1 | 1 | µg | mAUM | Silicone           | 0.806 | 0.429 | 12 |
| 3.1 | 1 | 1 | µg | mAUM | Silicone           | 0.698 | 0.408 | 13 |
| 3.1 | 1 | 1 | µg | mAUM | Silicone           | 0.814 | 0.382 | 14 |
| 3.1 | 1 | 1 | µg | mAUM | Silicone           | 1.032 | 0.341 | 15 |
| 3.1 | 1 | 1 | µg | mAUM | Silicone           | 0.988 | 0.332 | 16 |
| 3.1 | 1 | 1 | µg | mAUM | Silicone           | 0.806 | 0.367 | 17 |
| 3.1 | 1 | 1 | µg | mAUM | Silicone           | 1.019 | 0.421 | 18 |
| 3.1 | 1 | 1 | µg | mAUM | Silicone           | 1.096 | 0.354 | 19 |
| 3.1 | 1 | 1 | µg | mAUM | Silicone           | 0.788 | 0.312 | 20 |
| 3.1 | 1 | 1 | µg | mAUM | Silicone           | 1.049 | 0.403 | 21 |
| 3.1 | 1 | 1 | µg | mAUM | Silicone           | 0.718 | 0.357 | 22 |
| 3.1 | 1 | 1 | µg | mAUM | Silicone           | 0.911 | 0.368 | 23 |
| 3.1 | 1 | 1 | µg | mAUM | Silicone           | 0.838 | 0.373 | 24 |
| 3.1 | 1 | 1 | µg | mAUM | Silicone           | 0.697 | 0.361 | 25 |
| 3.2 | 2 | 1 | µg | mAUM | Silicone           | 0.755 | 0.252 | 1  |
| 3.2 | 2 | 1 | µg | mAUM | Silicone           | 0.958 | 0.269 | 2  |
| 3.2 | 2 | 1 | µg | mAUM | Silicone           | 0.659 | 0.309 | 3  |
| 3.2 | 2 | 1 | µg | mAUM | Silicone           | 0.697 | 0.318 | 4  |
| 3.2 | 2 | 1 | µg | mAUM | Silicone           | 1.169 | 0.303 | 5  |
| 3.2 | 2 | 1 | µg | mAUM | Silicone           | 0.903 | 0.336 | 6  |
| 3.2 | 2 | 1 | µg | mAUM | Silicone           | 1.058 | 0.361 | 7  |
| 3.2 | 2 | 1 | µg | mAUM | Silicone           | 0.605 | 0.364 | 8  |
| 3.2 | 2 | 1 | µg | mAUM | Silicone           | 0.546 | 0.363 | 9  |
| 3.2 | 2 | 1 | µg | mAUM | Silicone           | 0.898 | 0.323 | 10 |
| 3.2 | 2 | 1 | µg | mAUM | Silicone           | 1.21  | 0.323 | 11 |
| 3.2 | 2 | 1 | µg | mAUM | Silicone           | 0.84  | 0.325 | 12 |
| 3.2 | 2 | 1 | µg | mAUM | Silicone           | 0.762 | 0.333 | 13 |
| 3.2 | 2 | 1 | µg | mAUM | Silicone           | 0.97  | 0.345 | 14 |
| 3.2 | 2 | 1 | µg | mAUM | Silicone           | 1.293 | 0.36  | 15 |
| 3.2 | 2 | 1 | µg | mAUM | Silicone           | 0.979 | 0.305 | 16 |
| 3.2 | 2 | 1 | µg | mAUM | Silicone           | 1.067 | 0.395 | 17 |
| 3.2 | 2 | 1 | µg | mAUM | Silicone           | 0.984 | 0.315 | 18 |
| 3.2 | 2 | 1 | µg | mAUM | Silicone           | 1.356 | 0.29  | 19 |
| 3.2 | 2 | 1 | µg | mAUM | Silicone           | 0.872 | 0.343 | 20 |
| 3.2 | 2 | 1 | µg | mAUM | Silicone           | 0.907 | 0.277 | 21 |

|     |   |   |    |      |          |       |       |    |
|-----|---|---|----|------|----------|-------|-------|----|
| 3.2 | 2 | 1 | µg | mAUM | Silicone | 0.874 | 0.364 | 22 |
| 3.2 | 2 | 1 | µg | mAUM | Silicone | 1.154 | 0.351 | 23 |
| 3.2 | 2 | 1 | µg | mAUM | Silicone | 0.869 | 0.298 | 24 |
| 3.2 | 2 | 1 | µg | mAUM | Silicone | 0.894 | 0.333 | 25 |
| 3.3 | 3 | 1 | µg | mAUM | Silicone | 1.188 | 0.504 | 1  |
| 3.3 | 3 | 1 | µg | mAUM | Silicone | 1.055 | 0.453 | 2  |
| 3.3 | 3 | 1 | µg | mAUM | Silicone | 1.117 | 0.377 | 3  |
| 3.3 | 3 | 1 | µg | mAUM | Silicone | 1.063 | 0.456 | 4  |
| 3.3 | 3 | 1 | µg | mAUM | Silicone | 0.976 | 0.464 | 5  |
| 3.3 | 3 | 1 | µg | mAUM | Silicone | 1.089 | 0.499 | 6  |
| 3.3 | 3 | 1 | µg | mAUM | Silicone | 1.305 | 0.439 | 7  |
| 3.3 | 3 | 1 | µg | mAUM | Silicone | 1.478 | 0.53  | 8  |
| 3.3 | 3 | 1 | µg | mAUM | Silicone | 0.968 | 0.373 | 9  |
| 3.3 | 3 | 1 | µg | mAUM | Silicone | 1.037 | 0.497 | 10 |
| 3.3 | 3 | 1 | µg | mAUM | Silicone | 0.988 | 0.433 | 11 |
| 3.3 | 3 | 1 | µg | mAUM | Silicone | 0.787 | 0.53  | 12 |
| 3.3 | 3 | 1 | µg | mAUM | Silicone | 1.094 | 0.532 | 13 |
| 3.3 | 3 | 1 | µg | mAUM | Silicone | 1.485 | 0.549 | 14 |
| 3.3 | 3 | 1 | µg | mAUM | Silicone | 1.372 | 0.502 | 15 |
| 3.3 | 3 | 1 | µg | mAUM | Silicone | 1.32  | 0.388 | 16 |
| 3.3 | 3 | 1 | µg | mAUM | Silicone | 1.184 | 0.499 | 17 |
| 3.3 | 3 | 1 | µg | mAUM | Silicone | 0.957 | 0.445 | 18 |
| 3.3 | 3 | 1 | µg | mAUM | Silicone | 0.646 | 0.443 | 19 |
| 3.3 | 3 | 1 | µg | mAUM | Silicone | 0.714 | 0.477 | 20 |
| 3.3 | 3 | 1 | µg | mAUM | Silicone | 1.174 | 0.463 | 21 |
| 3.3 | 3 | 1 | µg | mAUM | Silicone | 0.799 | 0.466 | 22 |
| 3.3 | 3 | 1 | µg | mAUM | Silicone | 0.775 | 0.414 | 23 |
| 3.3 | 3 | 1 | µg | mAUM | Silicone | 0.835 | 0.554 | 24 |
| 3.3 | 3 | 1 | µg | mAUM | Silicone | 1.029 | 0.54  | 25 |
| 3.4 | 4 | 1 | µg | mAUM | Silicone | 0.82  | 0.329 | 1  |
| 3.4 | 4 | 1 | µg | mAUM | Silicone | 0.707 | 0.391 | 2  |
| 3.4 | 4 | 1 | µg | mAUM | Silicone | 0.894 | 0.344 | 3  |
| 3.4 | 4 | 1 | µg | mAUM | Silicone | 1.134 | 0.357 | 4  |
| 3.4 | 4 | 1 | µg | mAUM | Silicone | 0.738 | 0.398 | 5  |
| 3.4 | 4 | 1 | µg | mAUM | Silicone | 0.775 | 0.441 | 6  |
| 3.4 | 4 | 1 | µg | mAUM | Silicone | 0.696 | 0.361 | 7  |
| 3.4 | 4 | 1 | µg | mAUM | Silicone | 0.76  | 0.362 | 8  |
| 3.4 | 4 | 1 | µg | mAUM | Silicone | 0.696 | 0.391 | 9  |
| 3.4 | 4 | 1 | µg | mAUM | Silicone | 0.893 | 0.394 | 10 |
| 3.4 | 4 | 1 | µg | mAUM | Silicone | 0.958 | 0.346 | 11 |
| 3.4 | 4 | 1 | µg | mAUM | Silicone | 0.717 | 0.387 | 12 |
| 3.4 | 4 | 1 | µg | mAUM | Silicone | 0.914 | 0.35  | 13 |
| 3.4 | 4 | 1 | µg | mAUM | Silicone | 0.64  | 0.411 | 14 |
| 3.4 | 4 | 1 | µg | mAUM | Silicone | 1.106 | 0.349 | 15 |
| 3.4 | 4 | 1 | µg | mAUM | Silicone | 0.85  | 0.317 | 16 |
| 3.4 | 4 | 1 | µg | mAUM | Silicone | 0.709 | 0.377 | 17 |
| 3.4 | 4 | 1 | µg | mAUM | Silicone | 0.997 | 0.353 | 18 |
| 3.4 | 4 | 1 | µg | mAUM | Silicone | 0.875 | 0.326 | 19 |
| 3.4 | 4 | 1 | µg | mAUM | Silicone | 0.957 | 0.343 | 20 |
| 3.4 | 4 | 1 | µg | mAUM | Silicone | 0.864 | 0.337 | 21 |

|     |   |   |    |      |               |       |       |    |
|-----|---|---|----|------|---------------|-------|-------|----|
| 3.4 | 4 | 1 | µg | mAUM | Silicone      | 1.336 | 0.328 | 22 |
| 3.4 | 4 | 1 | µg | mAUM | Silicone      | 0.609 | 0.409 | 23 |
| 3.4 | 4 | 1 | µg | mAUM | Silicone      | 0.953 | 0.319 | 24 |
| 3.4 | 4 | 1 | µg | mAUM | Silicone      | 0.987 | 0.359 | 25 |
| 3.5 | 1 | 1 | µg | mAUM | Silicone-DLIP | 0.807 | 0.297 | 1  |
| 3.5 | 1 | 1 | µg | mAUM | Silicone-DLIP | 0.917 | 0.305 | 2  |
| 3.5 | 1 | 1 | µg | mAUM | Silicone-DLIP | 0.639 | 0.327 | 3  |
| 3.5 | 1 | 1 | µg | mAUM | Silicone-DLIP | 0.941 | 0.323 | 4  |
| 3.5 | 1 | 1 | µg | mAUM | Silicone-DLIP | 0.749 | 0.289 | 5  |
| 3.5 | 1 | 1 | µg | mAUM | Silicone-DLIP | 0.951 | 0.305 | 6  |
| 3.5 | 1 | 1 | µg | mAUM | Silicone-DLIP | 0.976 | 0.355 | 7  |
| 3.5 | 1 | 1 | µg | mAUM | Silicone-DLIP | 0.805 | 0.392 | 8  |
| 3.5 | 1 | 1 | µg | mAUM | Silicone-DLIP | 1.022 | 0.38  | 9  |
| 3.5 | 1 | 1 | µg | mAUM | Silicone-DLIP | 0.755 | 0.393 | 10 |
| 3.5 | 1 | 1 | µg | mAUM | Silicone-DLIP | 0.547 | 0.382 | 11 |
| 3.5 | 1 | 1 | µg | mAUM | Silicone-DLIP | 0.796 | 0.353 | 12 |
| 3.5 | 1 | 1 | µg | mAUM | Silicone-DLIP | 0.714 | 0.387 | 13 |
| 3.5 | 1 | 1 | µg | mAUM | Silicone-DLIP | 0.811 | 0.307 | 14 |
| 3.5 | 1 | 1 | µg | mAUM | Silicone-DLIP | 0.8   | 0.376 | 15 |
| 3.5 | 1 | 1 | µg | mAUM | Silicone-DLIP | 0.738 | 0.35  | 16 |
| 3.5 | 1 | 1 | µg | mAUM | Silicone-DLIP | 0.677 | 0.332 | 17 |
| 3.5 | 1 | 1 | µg | mAUM | Silicone-DLIP | 0.961 | 0.327 | 18 |
| 3.5 | 1 | 1 | µg | mAUM | Silicone-DLIP | 0.63  | 0.362 | 19 |
| 3.5 | 1 | 1 | µg | mAUM | Silicone-DLIP | 0.762 | 0.301 | 20 |
| 3.5 | 1 | 1 | µg | mAUM | Silicone-DLIP | 0.62  | 0.274 | 21 |
| 3.5 | 1 | 1 | µg | mAUM | Silicone-DLIP | 0.567 | 0.301 | 22 |
| 3.5 | 1 | 1 | µg | mAUM | Silicone-DLIP | 0.68  | 0.313 | 23 |
| 3.5 | 1 | 1 | µg | mAUM | Silicone-DLIP | 0.918 | 0.317 | 24 |
| 3.5 | 1 | 1 | µg | mAUM | Silicone-DLIP | 0.737 | 0.317 | 25 |
| 3.6 | 2 | 1 | µg | mAUM | Silicone-DLIP | 0.959 | 0.339 | 1  |
| 3.6 | 2 | 1 | µg | mAUM | Silicone-DLIP | 0.687 | 0.339 | 2  |
| 3.6 | 2 | 1 | µg | mAUM | Silicone-DLIP | 0.765 | 0.366 | 3  |
| 3.6 | 2 | 1 | µg | mAUM | Silicone-DLIP | 0.466 | 0.385 | 4  |
| 3.6 | 2 | 1 | µg | mAUM | Silicone-DLIP | 0.467 | 0.233 | 5  |
| 3.6 | 2 | 1 | µg | mAUM | Silicone-DLIP | 0.775 | 0.358 | 6  |
| 3.6 | 2 | 1 | µg | mAUM | Silicone-DLIP | 1.034 | 0.33  | 7  |
| 3.6 | 2 | 1 | µg | mAUM | Silicone-DLIP | 1.164 | 0.336 | 8  |
| 3.6 | 2 | 1 | µg | mAUM | Silicone-DLIP | 0.89  | 0.295 | 9  |
| 3.6 | 2 | 1 | µg | mAUM | Silicone-DLIP | 1.318 | 0.385 | 10 |
| 3.6 | 2 | 1 | µg | mAUM | Silicone-DLIP | 1.016 | 0.357 | 11 |
| 3.6 | 2 | 1 | µg | mAUM | Silicone-DLIP | 1.571 | 0.306 | 12 |
| 3.6 | 2 | 1 | µg | mAUM | Silicone-DLIP | 0.754 | 0.395 | 13 |
| 3.6 | 2 | 1 | µg | mAUM | Silicone-DLIP | 0.928 | 0.323 | 14 |
| 3.6 | 2 | 1 | µg | mAUM | Silicone-DLIP | 0.877 | 0.332 | 15 |
| 3.6 | 2 | 1 | µg | mAUM | Silicone-DLIP | 0.334 | 0.334 | 16 |
| 3.6 | 2 | 1 | µg | mAUM | Silicone-DLIP | 0.332 | 0.332 | 17 |
| 3.6 | 2 | 1 | µg | mAUM | Silicone-DLIP | 0.391 | 0.391 | 18 |
| 3.6 | 2 | 1 | µg | mAUM | Silicone-DLIP | 0.379 | 0.379 | 19 |
| 3.6 | 2 | 1 | µg | mAUM | Silicone-DLIP | 0.313 | 0.313 | 20 |
| 3.6 | 2 | 1 | µg | mAUM | Silicone-DLIP | 0.329 | 0.329 | 21 |

|     |   |   |    |      |               |       |       |    |
|-----|---|---|----|------|---------------|-------|-------|----|
| 3.6 | 2 | 1 | µg | mAUM | Silicone-DLIP | 0.632 | 0.298 | 22 |
| 3.6 | 2 | 1 | µg | mAUM | Silicone-DLIP | 0.761 | 0.372 | 23 |
| 3.6 | 2 | 1 | µg | mAUM | Silicone-DLIP | 0.586 | 0.362 | 24 |
| 3.6 | 2 | 1 | µg | mAUM | Silicone-DLIP | 0.714 | 0.296 | 25 |
| 3.7 | 3 | 1 | µg | mAUM | Silicone-DLIP | 0.952 | 0.292 | 1  |
| 3.7 | 3 | 1 | µg | mAUM | Silicone-DLIP | 0.554 | 0.258 | 2  |
| 3.7 | 3 | 1 | µg | mAUM | Silicone-DLIP | 0.641 | 0.344 | 3  |
| 3.7 | 3 | 1 | µg | mAUM | Silicone-DLIP | 0.714 | 0.277 | 4  |
| 3.7 | 3 | 1 | µg | mAUM | Silicone-DLIP | 0.626 | 0.341 | 5  |
| 3.7 | 3 | 1 | µg | mAUM | Silicone-DLIP | 0.88  | 0.38  | 6  |
| 3.7 | 3 | 1 | µg | mAUM | Silicone-DLIP | 0.538 | 0.323 | 7  |
| 3.7 | 3 | 1 | µg | mAUM | Silicone-DLIP | 0.449 | 0.41  | 8  |
| 3.7 | 3 | 1 | µg | mAUM | Silicone-DLIP | 0.433 | 0.257 | 9  |
| 3.7 | 3 | 1 | µg | mAUM | Silicone-DLIP | 0.679 | 0.4   | 10 |
| 3.7 | 3 | 1 | µg | mAUM | Silicone-DLIP | 0.762 | 0.323 | 11 |
| 3.7 | 3 | 1 | µg | mAUM | Silicone-DLIP | 0.747 | 0.319 | 12 |
| 3.7 | 3 | 1 | µg | mAUM | Silicone-DLIP | 1.022 | 0.407 | 13 |
| 3.7 | 3 | 1 | µg | mAUM | Silicone-DLIP | 0.966 | 0.362 | 14 |
| 3.7 | 3 | 1 | µg | mAUM | Silicone-DLIP | 0.749 | 0.298 | 15 |
| 3.7 | 3 | 1 | µg | mAUM | Silicone-DLIP | 0.624 | 0.381 | 16 |
| 3.7 | 3 | 1 | µg | mAUM | Silicone-DLIP | 0.725 | 0.513 | 17 |
| 3.7 | 3 | 1 | µg | mAUM | Silicone-DLIP | 0.761 | 0.281 | 18 |
| 3.7 | 3 | 1 | µg | mAUM | Silicone-DLIP | 0.685 | 0.28  | 19 |
| 3.7 | 3 | 1 | µg | mAUM | Silicone-DLIP | 0.678 | 0.352 | 20 |
| 3.7 | 3 | 1 | µg | mAUM | Silicone-DLIP | 1.067 | 0.35  | 21 |
| 3.7 | 3 | 1 | µg | mAUM | Silicone-DLIP | 0.639 | 0.285 | 22 |
| 3.7 | 3 | 1 | µg | mAUM | Silicone-DLIP | 0.707 | 0.316 | 23 |
| 3.7 | 3 | 1 | µg | mAUM | Silicone-DLIP | 0.592 | 0.368 | 24 |
| 3.7 | 3 | 1 | µg | mAUM | Silicone-DLIP | 0.533 | 0.269 | 25 |
| 3.8 | 4 | 1 | µg | mAUM | Silicone-DLIP | 0.728 | 0.317 | 1  |
| 3.8 | 4 | 1 | µg | mAUM | Silicone-DLIP | 0.694 | 0.246 | 2  |
| 3.8 | 4 | 1 | µg | mAUM | Silicone-DLIP | 0.523 | 0.269 | 3  |
| 3.8 | 4 | 1 | µg | mAUM | Silicone-DLIP | 0.458 | 0.25  | 4  |
| 3.8 | 4 | 1 | µg | mAUM | Silicone-DLIP | 0.593 | 0.26  | 5  |
| 3.8 | 4 | 1 | µg | mAUM | Silicone-DLIP | 0.933 | 0.338 | 6  |
| 3.8 | 4 | 1 | µg | mAUM | Silicone-DLIP | 0.683 | 0.254 | 7  |
| 3.8 | 4 | 1 | µg | mAUM | Silicone-DLIP | 0.569 | 0.36  | 8  |
| 3.8 | 4 | 1 | µg | mAUM | Silicone-DLIP | 0.569 | 0.417 | 9  |
| 3.8 | 4 | 1 | µg | mAUM | Silicone-DLIP | 0.498 | 0.268 | 10 |
| 3.8 | 4 | 1 | µg | mAUM | Silicone-DLIP | 0.482 | 0.286 | 11 |
| 3.8 | 4 | 1 | µg | mAUM | Silicone-DLIP | 0.675 | 0.305 | 12 |
| 3.8 | 4 | 1 | µg | mAUM | Silicone-DLIP | 0.629 | 0.336 | 13 |
| 3.8 | 4 | 1 | µg | mAUM | Silicone-DLIP | 0.787 | 0.256 | 14 |
| 3.8 | 4 | 1 | µg | mAUM | Silicone-DLIP | 0.539 | 0.316 | 15 |
| 3.8 | 4 | 1 | µg | mAUM | Silicone-DLIP | 0.523 | 0.273 | 16 |
| 3.8 | 4 | 1 | µg | mAUM | Silicone-DLIP | 0.431 | 0.375 | 17 |
| 3.8 | 4 | 1 | µg | mAUM | Silicone-DLIP | 0.694 | 0.313 | 18 |
| 3.8 | 4 | 1 | µg | mAUM | Silicone-DLIP | 0.533 | 0.323 | 19 |
| 3.8 | 4 | 1 | µg | mAUM | Silicone-DLIP | 0.857 | 0.372 | 20 |
| 3.8 | 4 | 1 | µg | mAUM | Silicone-DLIP | 0.594 | 0.419 | 21 |

|     |   |   |    |      |                    |       |       |    |
|-----|---|---|----|------|--------------------|-------|-------|----|
| 3.8 | 4 | 1 | µg | mAUM | Silicone-DLIP      | 0.907 | 0.335 | 22 |
| 3.8 | 4 | 1 | µg | mAUM | Silicone-DLIP      | 0.647 | 0.445 | 23 |
| 3.8 | 4 | 1 | µg | mAUM | Silicone-DLIP      | 0.646 | 0.315 | 24 |
| 3.8 | 4 | 1 | µg | mAUM | Silicone-DLIP      | 0.606 | 0.295 | 25 |
| 8.5 | 1 | 2 | µg | mAUM | Cellulose Membrane | 0.713 | 0.33  | 1  |
| 8.5 | 1 | 2 | µg | mAUM | Cellulose Membrane | 0.66  | 0.342 | 2  |
| 8.5 | 1 | 2 | µg | mAUM | Cellulose Membrane | 0.563 | 0.321 | 3  |
| 8.5 | 1 | 2 | µg | mAUM | Cellulose Membrane | 0.933 | 0.342 | 4  |
| 8.5 | 1 | 2 | µg | mAUM | Cellulose Membrane | 0.768 | 0.313 | 5  |
| 8.5 | 1 | 2 | µg | mAUM | Cellulose Membrane | 0.829 | 0.284 | 6  |
| 8.5 | 1 | 2 | µg | mAUM | Cellulose Membrane | 0.733 | 0.276 | 7  |
| 8.5 | 1 | 2 | µg | mAUM | Cellulose Membrane | 0.837 | 0.334 | 8  |
| 8.5 | 1 | 2 | µg | mAUM | Cellulose Membrane | 0.733 | 0.269 | 9  |
| 8.5 | 1 | 2 | µg | mAUM | Cellulose Membrane | 0.694 | 0.307 | 10 |
| 8.5 | 1 | 2 | µg | mAUM | Cellulose Membrane | 0.822 | 0.338 | 11 |
| 8.5 | 1 | 2 | µg | mAUM | Cellulose Membrane | 0.748 | 0.284 | 12 |
| 8.5 | 1 | 2 | µg | mAUM | Cellulose Membrane | 0.741 | 0.33  | 13 |
| 8.5 | 1 | 2 | µg | mAUM | Cellulose Membrane | 0.688 | 0.297 | 14 |
| 8.5 | 1 | 2 | µg | mAUM | Cellulose Membrane | 0.92  | 0.321 | 15 |
| 8.5 | 1 | 2 | µg | mAUM | Cellulose Membrane | 0.751 | 0.321 | 16 |
| 8.5 | 1 | 2 | µg | mAUM | Cellulose Membrane | 0.644 | 0.294 | 17 |
| 8.5 | 1 | 2 | µg | mAUM | Cellulose Membrane | 0.817 | 0.33  | 18 |
| 8.5 | 1 | 2 | µg | mAUM | Cellulose Membrane | 0.761 | 0.361 | 19 |
| 8.5 | 1 | 2 | µg | mAUM | Cellulose Membrane | 0.934 | 0.381 | 20 |
| 8.5 | 1 | 2 | µg | mAUM | Cellulose Membrane | 0.697 | 0.365 | 21 |
| 8.5 | 1 | 2 | µg | mAUM | Cellulose Membrane | 0.73  | 0.365 | 22 |
| 8.5 | 1 | 2 | µg | mAUM | Cellulose Membrane | 0.72  | 0.386 | 23 |

|     |   |   |    |      |                    |       |       |    |
|-----|---|---|----|------|--------------------|-------|-------|----|
| 8.5 | 1 | 2 | µg | mAUM | Cellulose Membrane | 0.727 | 0.298 | 24 |
| 8.5 | 1 | 2 | µg | mAUM | Cellulose Membrane | 0.704 | 0.295 | 25 |
| 8.6 | 2 | 2 | µg | mAUM | Cellulose Membrane | 0.649 | 0.303 | 1  |
| 8.6 | 2 | 2 | µg | mAUM | Cellulose Membrane | 0.685 | 0.305 | 2  |
| 8.6 | 2 | 2 | µg | mAUM | Cellulose Membrane | 0.958 | 0.276 | 3  |
| 8.6 | 2 | 2 | µg | mAUM | Cellulose Membrane | 0.741 | 0.309 | 4  |
| 8.6 | 2 | 2 | µg | mAUM | Cellulose Membrane | 0.963 | 0.348 | 5  |
| 8.6 | 2 | 2 | µg | mAUM | Cellulose Membrane | 0.653 | 0.308 | 6  |
| 8.6 | 2 | 2 | µg | mAUM | Cellulose Membrane | 0.628 | 0.348 | 7  |
| 8.6 | 2 | 2 | µg | mAUM | Cellulose Membrane | 0.814 | 0.365 | 8  |
| 8.6 | 2 | 2 | µg | mAUM | Cellulose Membrane | 0.719 | 0.322 | 9  |
| 8.6 | 2 | 2 | µg | mAUM | Cellulose Membrane | 0.841 | 0.305 | 10 |
| 8.6 | 2 | 2 | µg | mAUM | Cellulose Membrane | 0.77  | 0.407 | 11 |
| 8.6 | 2 | 2 | µg | mAUM | Cellulose Membrane | 0.913 | 0.307 | 12 |
| 8.6 | 2 | 2 | µg | mAUM | Cellulose Membrane | 0.945 | 0.432 | 13 |
| 8.6 | 2 | 2 | µg | mAUM | Cellulose Membrane | 0.898 | 0.371 | 14 |
| 8.6 | 2 | 2 | µg | mAUM | Cellulose Membrane | 0.949 | 0.356 | 15 |
| 8.6 | 2 | 2 | µg | mAUM | Cellulose Membrane | 0.636 | 0.315 | 16 |
| 8.6 | 2 | 2 | µg | mAUM | Cellulose Membrane | 0.728 | 0.284 | 17 |
| 8.6 | 2 | 2 | µg | mAUM | Cellulose Membrane | 0.961 | 0.311 | 18 |
| 8.6 | 2 | 2 | µg | mAUM | Cellulose Membrane | 0.69  | 0.341 | 19 |
| 8.6 | 2 | 2 | µg | mAUM | Cellulose Membrane | 0.876 | 0.312 | 20 |
| 8.6 | 2 | 2 | µg | mAUM | Cellulose Membrane | 0.845 | 0.335 | 21 |
| 8.6 | 2 | 2 | µg | mAUM | Cellulose Membrane | 0.809 | 0.328 | 22 |
| 8.6 | 2 | 2 | µg | mAUM | Cellulose Membrane | 0.779 | 0.362 | 23 |

|     |   |   |    |      |                    |       |       |    |
|-----|---|---|----|------|--------------------|-------|-------|----|
| 8.6 | 2 | 2 | µg | mAUM | Cellulose Membrane | 0.768 | 0.288 | 24 |
| 8.6 | 2 | 2 | µg | mAUM | Cellulose Membrane | 0.704 | 0.276 | 25 |
| 8.7 | 3 | 2 | µg | mAUM | Cellulose Membrane | 1.101 | 0.297 | 1  |
| 8.7 | 3 | 2 | µg | mAUM | Cellulose Membrane | 0.638 | 0.332 | 2  |
| 8.7 | 3 | 2 | µg | mAUM | Cellulose Membrane | 0.594 | 0.367 | 3  |
| 8.7 | 3 | 2 | µg | mAUM | Cellulose Membrane | 0.71  | 0.252 | 4  |
| 8.7 | 3 | 2 | µg | mAUM | Cellulose Membrane | 0.583 | 0.336 | 5  |
| 8.7 | 3 | 2 | µg | mAUM | Cellulose Membrane | 0.585 | 0.302 | 6  |
| 8.7 | 3 | 2 | µg | mAUM | Cellulose Membrane | 0.768 | 0.36  | 7  |
| 8.7 | 3 | 2 | µg | mAUM | Cellulose Membrane | 1.053 | 0.299 | 8  |
| 8.7 | 3 | 2 | µg | mAUM | Cellulose Membrane | 1.008 | 0.271 | 9  |
| 8.7 | 3 | 2 | µg | mAUM | Cellulose Membrane | 0.623 | 0.321 | 10 |
| 8.7 | 3 | 2 | µg | mAUM | Cellulose Membrane | 0.647 | 0.348 | 11 |
| 8.7 | 3 | 2 | µg | mAUM | Cellulose Membrane | 1.015 | 0.399 | 12 |
| 8.7 | 3 | 2 | µg | mAUM | Cellulose Membrane | 0.9   | 0.41  | 13 |
| 8.7 | 3 | 2 | µg | mAUM | Cellulose Membrane | 0.679 | 0.321 | 14 |
| 8.7 | 3 | 2 | µg | mAUM | Cellulose Membrane | 0.847 | 0.329 | 15 |
| 8.7 | 3 | 2 | µg | mAUM | Cellulose Membrane | 0.774 | 0.305 | 16 |
| 8.7 | 3 | 2 | µg | mAUM | Cellulose Membrane | 0.999 | 0.3   | 17 |
| 8.7 | 3 | 2 | µg | mAUM | Cellulose Membrane | 0.93  | 0.331 | 18 |
| 8.7 | 3 | 2 | µg | mAUM | Cellulose Membrane | 0.628 | 0.319 | 19 |
| 8.7 | 3 | 2 | µg | mAUM | Cellulose Membrane | 0.702 | 0.276 | 20 |
| 8.7 | 3 | 2 | µg | mAUM | Cellulose Membrane | 0.911 | 0.281 | 21 |
| 8.7 | 3 | 2 | µg | mAUM | Cellulose Membrane | 0.554 | 0.296 | 22 |
| 8.7 | 3 | 2 | µg | mAUM | Cellulose Membrane | 0.701 | 0.323 | 23 |

|     |   |   |    |      |                    |       |       |    |
|-----|---|---|----|------|--------------------|-------|-------|----|
| 8.7 | 3 | 2 | µg | mAUM | Cellulose Membrane | 1.202 | 0.323 | 24 |
| 8.7 | 3 | 2 | µg | mAUM | Cellulose Membrane | 0.963 | 0.334 | 25 |
| 8.8 | 4 | 2 | µg | mAUM | Cellulose Membrane | 0.738 | 0.361 | 1  |
| 8.8 | 4 | 2 | µg | mAUM | Cellulose Membrane | 0.831 | 0.308 | 2  |
| 8.8 | 4 | 2 | µg | mAUM | Cellulose Membrane | 0.521 | 0.369 | 3  |
| 8.8 | 4 | 2 | µg | mAUM | Cellulose Membrane | 0.801 | 0.303 | 4  |
| 8.8 | 4 | 2 | µg | mAUM | Cellulose Membrane | 0.728 | 0.303 | 5  |
| 8.8 | 4 | 2 | µg | mAUM | Cellulose Membrane | 0.681 | 0.331 | 6  |
| 8.8 | 4 | 2 | µg | mAUM | Cellulose Membrane | 1.035 | 0.334 | 7  |
| 8.8 | 4 | 2 | µg | mAUM | Cellulose Membrane | 0.768 | 0.269 | 8  |
| 8.8 | 4 | 2 | µg | mAUM | Cellulose Membrane | 0.668 | 0.267 | 9  |
| 8.8 | 4 | 2 | µg | mAUM | Cellulose Membrane | 0.771 | 0.278 | 10 |
| 8.8 | 4 | 2 | µg | mAUM | Cellulose Membrane | 0.668 | 0.266 | 11 |
| 8.8 | 4 | 2 | µg | mAUM | Cellulose Membrane | 0.541 | 0.26  | 12 |
| 8.8 | 4 | 2 | µg | mAUM | Cellulose Membrane | 0.99  | 0.245 | 13 |
| 8.8 | 4 | 2 | µg | mAUM | Cellulose Membrane | 0.627 | 0.328 | 14 |
| 8.8 | 4 | 2 | µg | mAUM | Cellulose Membrane | 0.715 | 0.323 | 15 |
| 8.8 | 4 | 2 | µg | mAUM | Cellulose Membrane | 0.781 | 0.305 | 16 |
| 8.8 | 4 | 2 | µg | mAUM | Cellulose Membrane | 0.746 | 0.346 | 17 |
| 8.8 | 4 | 2 | µg | mAUM | Cellulose Membrane | 0.733 | 0.343 | 18 |
| 8.8 | 4 | 2 | µg | mAUM | Cellulose Membrane | 0.647 | 0.355 | 19 |
| 8.8 | 4 | 2 | µg | mAUM | Cellulose Membrane | 0.821 | 0.29  | 20 |
| 8.8 | 4 | 2 | µg | mAUM | Cellulose Membrane | 0.653 | 0.341 | 21 |
| 8.8 | 4 | 2 | µg | mAUM | Cellulose Membrane | 0.754 | 0.364 | 22 |
| 8.8 | 4 | 2 | µg | mAUM | Cellulose Membrane | 0.921 | 0.408 | 23 |

|     |   |   |    |      |                    |       |       |    |
|-----|---|---|----|------|--------------------|-------|-------|----|
| 8.8 | 4 | 2 | µg | mAUM | Cellulose Membrane | 0.88  | 0.366 | 24 |
| 8.8 | 4 | 2 | µg | mAUM | Cellulose Membrane | 0.716 | 0.328 | 25 |
| 9.1 | 1 | 2 | µg | mAUM | Silicone           | 0.973 | 0.401 | 1  |
| 9.1 | 1 | 2 | µg | mAUM | Silicone           | 0.776 | 0.283 | 2  |
| 9.1 | 1 | 2 | µg | mAUM | Silicone           | 1.125 | 0.257 | 3  |
| 9.1 | 1 | 2 | µg | mAUM | Silicone           | 0.892 | 0.347 | 4  |
| 9.1 | 1 | 2 | µg | mAUM | Silicone           | 0.775 | 0.279 | 5  |
| 9.1 | 1 | 2 | µg | mAUM | Silicone           | 0.938 | 0.361 | 6  |
| 9.1 | 1 | 2 | µg | mAUM | Silicone           | 0.718 | 0.272 | 7  |
| 9.1 | 1 | 2 | µg | mAUM | Silicone           | 0.878 | 0.339 | 8  |
| 9.1 | 1 | 2 | µg | mAUM | Silicone           | 0.483 | 0.305 | 9  |
| 9.1 | 1 | 2 | µg | mAUM | Silicone           | 1.158 | 0.305 | 10 |
| 9.1 | 1 | 2 | µg | mAUM | Silicone           | 0.758 | 0.371 | 11 |
| 9.1 | 1 | 2 | µg | mAUM | Silicone           | 0.759 | 0.273 | 12 |
| 9.1 | 1 | 2 | µg | mAUM | Silicone           | 1.262 | 0.311 | 13 |
| 9.1 | 1 | 2 | µg | mAUM | Silicone           | 0.608 | 0.332 | 14 |
| 9.1 | 1 | 2 | µg | mAUM | Silicone           | 0.599 | 0.378 | 15 |
| 9.1 | 1 | 2 | µg | mAUM | Silicone           | 0.963 | 0.311 | 16 |
| 9.1 | 1 | 2 | µg | mAUM | Silicone           | 0.676 | 0.321 | 17 |
| 9.1 | 1 | 2 | µg | mAUM | Silicone           | 0.808 | 0.376 | 18 |
| 9.1 | 1 | 2 | µg | mAUM | Silicone           | 0.661 | 0.316 | 19 |
| 9.1 | 1 | 2 | µg | mAUM | Silicone           | 0.742 | 0.332 | 20 |
| 9.1 | 1 | 2 | µg | mAUM | Silicone           | 0.726 | 0.332 | 21 |
| 9.1 | 1 | 2 | µg | mAUM | Silicone           | 0.757 | 0.238 | 22 |
| 9.1 | 1 | 2 | µg | mAUM | Silicone           | 0.958 | 0.315 | 23 |
| 9.1 | 1 | 2 | µg | mAUM | Silicone           | 0.973 | 0.413 | 24 |
| 9.1 | 1 | 2 | µg | mAUM | Silicone           | 1.201 | 0.391 | 25 |
| 9.2 | 2 | 2 | µg | mAUM | Silicone           | 0.791 | 0.303 | 1  |
| 9.2 | 2 | 2 | µg | mAUM | Silicone           | 0.735 | 0.352 | 2  |
| 9.2 | 2 | 2 | µg | mAUM | Silicone           | 0.774 | 0.279 | 3  |
| 9.2 | 2 | 2 | µg | mAUM | Silicone           | 0.783 | 0.356 | 4  |
| 9.2 | 2 | 2 | µg | mAUM | Silicone           | 0.613 | 0.304 | 5  |
| 9.2 | 2 | 2 | µg | mAUM | Silicone           | 0.674 | 0.354 | 6  |
| 9.2 | 2 | 2 | µg | mAUM | Silicone           | 0.623 | 0.255 | 7  |
| 9.2 | 2 | 2 | µg | mAUM | Silicone           | 0.957 | 0.279 | 8  |
| 9.2 | 2 | 2 | µg | mAUM | Silicone           | 0.774 | 0.327 | 9  |
| 9.2 | 2 | 2 | µg | mAUM | Silicone           | 0.91  | 0.295 | 10 |
| 9.2 | 2 | 2 | µg | mAUM | Silicone           | 0.752 | 0.26  | 11 |
| 9.2 | 2 | 2 | µg | mAUM | Silicone           | 0.653 | 0.346 | 12 |
| 9.2 | 2 | 2 | µg | mAUM | Silicone           | 0.66  | 0.292 | 13 |
| 9.2 | 2 | 2 | µg | mAUM | Silicone           | 0.777 | 0.282 | 14 |
| 9.2 | 2 | 2 | µg | mAUM | Silicone           | 0.925 | 0.333 | 15 |
| 9.2 | 2 | 2 | µg | mAUM | Silicone           | 0.615 | 0.308 | 16 |
| 9.2 | 2 | 2 | µg | mAUM | Silicone           | 1.016 | 0.294 | 17 |
| 9.2 | 2 | 2 | µg | mAUM | Silicone           | 0.599 | 0.275 | 18 |
| 9.2 | 2 | 2 | µg | mAUM | Silicone           | 0.804 | 0.372 | 19 |
| 9.2 | 2 | 2 | µg | mAUM | Silicone           | 0.818 | 0.321 | 20 |
| 9.2 | 2 | 2 | µg | mAUM | Silicone           | 0.88  | 0.257 | 21 |

|     |   |   |    |      |          |       |       |    |
|-----|---|---|----|------|----------|-------|-------|----|
| 9.2 | 2 | 2 | µg | mAUM | Silicone | 0.706 | 0.33  | 22 |
| 9.2 | 2 | 2 | µg | mAUM | Silicone | 0.796 | 0.309 | 23 |
| 9.2 | 2 | 2 | µg | mAUM | Silicone | 0.872 | 0.325 | 24 |
| 9.2 | 2 | 2 | µg | mAUM | Silicone | 0.828 | 0.277 | 25 |
| 9.3 | 3 | 2 | µg | mAUM | Silicone | 0.71  | 0.334 | 1  |
| 9.3 | 3 | 2 | µg | mAUM | Silicone | 0.796 | 0.33  | 2  |
| 9.3 | 3 | 2 | µg | mAUM | Silicone | 0.821 | 0.376 | 3  |
| 9.3 | 3 | 2 | µg | mAUM | Silicone | 0.815 | 0.321 | 4  |
| 9.3 | 3 | 2 | µg | mAUM | Silicone | 0.948 | 0.383 | 5  |
| 9.3 | 3 | 2 | µg | mAUM | Silicone | 0.756 | 0.375 | 6  |
| 9.3 | 3 | 2 | µg | mAUM | Silicone | 0.941 | 0.327 | 7  |
| 9.3 | 3 | 2 | µg | mAUM | Silicone | 0.662 | 0.359 | 8  |
| 9.3 | 3 | 2 | µg | mAUM | Silicone | 0.726 | 0.371 | 9  |
| 9.3 | 3 | 2 | µg | mAUM | Silicone | 0.785 | 0.371 | 10 |
| 9.3 | 3 | 2 | µg | mAUM | Silicone | 0.764 | 0.323 | 11 |
| 9.3 | 3 | 2 | µg | mAUM | Silicone | 0.864 | 0.344 | 12 |
| 9.3 | 3 | 2 | µg | mAUM | Silicone | 0.653 | 0.387 | 13 |
| 9.3 | 3 | 2 | µg | mAUM | Silicone | 0.864 | 0.358 | 14 |
| 9.3 | 3 | 2 | µg | mAUM | Silicone | 0.836 | 0.387 | 15 |
| 9.3 | 3 | 2 | µg | mAUM | Silicone | 0.865 | 0.346 | 16 |
| 9.3 | 3 | 2 | µg | mAUM | Silicone | 0.713 | 0.361 | 17 |
| 9.3 | 3 | 2 | µg | mAUM | Silicone | 0.851 | 0.331 | 18 |
| 9.3 | 3 | 2 | µg | mAUM | Silicone | 0.578 | 0.378 | 19 |
| 9.3 | 3 | 2 | µg | mAUM | Silicone | 0.778 | 0.315 | 20 |
| 9.3 | 3 | 2 | µg | mAUM | Silicone | 0.743 | 0.341 | 21 |
| 9.3 | 3 | 2 | µg | mAUM | Silicone | 0.698 | 0.406 | 22 |
| 9.3 | 3 | 2 | µg | mAUM | Silicone | 0.746 | 0.338 | 23 |
| 9.3 | 3 | 2 | µg | mAUM | Silicone | 1.143 | 0.348 | 24 |
| 9.3 | 3 | 2 | µg | mAUM | Silicone | 0.952 | 0.365 | 25 |
| 9.4 | 4 | 2 | µg | mAUM | Silicone | 0.682 | 0.334 | 1  |
| 9.4 | 4 | 2 | µg | mAUM | Silicone | 0.823 | 0.342 | 2  |
| 9.4 | 4 | 2 | µg | mAUM | Silicone | 0.582 | 0.323 | 3  |
| 9.4 | 4 | 2 | µg | mAUM | Silicone | 0.813 | 0.315 | 4  |
| 9.4 | 4 | 2 | µg | mAUM | Silicone | 0.853 | 0.264 | 5  |
| 9.4 | 4 | 2 | µg | mAUM | Silicone | 0.804 | 0.321 | 6  |
| 9.4 | 4 | 2 | µg | mAUM | Silicone | 0.801 | 0.305 | 7  |
| 9.4 | 4 | 2 | µg | mAUM | Silicone | 1.091 | 0.282 | 8  |
| 9.4 | 4 | 2 | µg | mAUM | Silicone | 0.643 | 0.351 | 9  |
| 9.4 | 4 | 2 | µg | mAUM | Silicone | 0.799 | 0.283 | 10 |
| 9.4 | 4 | 2 | µg | mAUM | Silicone | 0.712 | 0.415 | 11 |
| 9.4 | 4 | 2 | µg | mAUM | Silicone | 0.85  | 0.258 | 12 |
| 9.4 | 4 | 2 | µg | mAUM | Silicone | 0.97  | 0.395 | 13 |
| 9.4 | 4 | 2 | µg | mAUM | Silicone | 1.175 | 0.39  | 14 |
| 9.4 | 4 | 2 | µg | mAUM | Silicone | 0.861 | 0.343 | 15 |
| 9.4 | 4 | 2 | µg | mAUM | Silicone | 0.547 | 0.332 | 16 |
| 9.4 | 4 | 2 | µg | mAUM | Silicone | 0.99  | 0.357 | 17 |
| 9.4 | 4 | 2 | µg | mAUM | Silicone | 1.071 | 0.276 | 18 |
| 9.4 | 4 | 2 | µg | mAUM | Silicone | 1.098 | 0.297 | 19 |
| 9.4 | 4 | 2 | µg | mAUM | Silicone | 1.208 | 0.324 | 20 |
| 9.4 | 4 | 2 | µg | mAUM | Silicone | 0.873 | 0.292 | 21 |

|     |   |   |    |      |               |       |       |    |
|-----|---|---|----|------|---------------|-------|-------|----|
| 9.4 | 4 | 2 | µg | mAUM | Silicone      | 0.902 | 0.339 | 22 |
| 9.4 | 4 | 2 | µg | mAUM | Silicone      | 0.752 | 0.317 | 23 |
| 9.4 | 4 | 2 | µg | mAUM | Silicone      | 0.968 | 0.265 | 24 |
| 9.4 | 4 | 2 | µg | mAUM | Silicone      | 1.101 | 0.351 | 25 |
| 9.5 | 1 | 2 | µg | mAUM | Silicone-DLIP | 0.836 | 0.321 | 1  |
| 9.5 | 1 | 2 | µg | mAUM | Silicone-DLIP | 0.905 | 0.353 | 2  |
| 9.5 | 1 | 2 | µg | mAUM | Silicone-DLIP | 0.674 | 0.387 | 3  |
| 9.5 | 1 | 2 | µg | mAUM | Silicone-DLIP | 0.737 | 0.299 | 4  |
| 9.5 | 1 | 2 | µg | mAUM | Silicone-DLIP | 0.738 | 0.338 | 5  |
| 9.5 | 1 | 2 | µg | mAUM | Silicone-DLIP | 0.806 | 0.347 | 6  |
| 9.5 | 1 | 2 | µg | mAUM | Silicone-DLIP | 1.019 | 0.331 | 7  |
| 9.5 | 1 | 2 | µg | mAUM | Silicone-DLIP | 0.682 | 0.379 | 8  |
| 9.5 | 1 | 2 | µg | mAUM | Silicone-DLIP | 0.712 | 0.314 | 9  |
| 9.5 | 1 | 2 | µg | mAUM | Silicone-DLIP | 1.23  | 0.298 | 10 |
| 9.5 | 1 | 2 | µg | mAUM | Silicone-DLIP | 0.825 | 0.384 | 11 |
| 9.5 | 1 | 2 | µg | mAUM | Silicone-DLIP | 1.139 | 0.367 | 12 |
| 9.5 | 1 | 2 | µg | mAUM | Silicone-DLIP | 0.718 | 0.367 | 13 |
| 9.5 | 1 | 2 | µg | mAUM | Silicone-DLIP | 0.586 | 0.337 | 14 |
| 9.5 | 1 | 2 | µg | mAUM | Silicone-DLIP | 0.916 | 0.341 | 15 |
| 9.5 | 1 | 2 | µg | mAUM | Silicone-DLIP | 0.839 | 0.355 | 16 |
| 9.5 | 1 | 2 | µg | mAUM | Silicone-DLIP | 1.009 | 0.33  | 17 |
| 9.5 | 1 | 2 | µg | mAUM | Silicone-DLIP | 0.567 | 0.346 | 18 |
| 9.5 | 1 | 2 | µg | mAUM | Silicone-DLIP | 0.581 | 0.346 | 19 |
| 9.5 | 1 | 2 | µg | mAUM | Silicone-DLIP | 0.915 | 0.309 | 20 |
| 9.5 | 1 | 2 | µg | mAUM | Silicone-DLIP | 0.912 | 0.346 | 21 |
| 9.5 | 1 | 2 | µg | mAUM | Silicone-DLIP | 0.781 | 0.344 | 22 |
| 9.5 | 1 | 2 | µg | mAUM | Silicone-DLIP | 0.754 | 0.379 | 23 |
| 9.5 | 1 | 2 | µg | mAUM | Silicone-DLIP | 0.866 | 0.322 | 24 |
| 9.5 | 1 | 2 | µg | mAUM | Silicone-DLIP | 0.964 | 0.352 | 25 |
| 9.6 | 2 | 2 | µg | mAUM | Silicone-DLIP | 0.863 | 0.311 | 1  |
| 9.6 | 2 | 2 | µg | mAUM | Silicone-DLIP | 1.088 | 0.319 | 2  |
| 9.6 | 2 | 2 | µg | mAUM | Silicone-DLIP | 0.958 | 0.399 | 3  |
| 9.6 | 2 | 2 | µg | mAUM | Silicone-DLIP | 1.242 | 0.36  | 4  |
| 9.6 | 2 | 2 | µg | mAUM | Silicone-DLIP | 0.931 | 0.368 | 5  |
| 9.6 | 2 | 2 | µg | mAUM | Silicone-DLIP | 0.695 | 0.315 | 6  |
| 9.6 | 2 | 2 | µg | mAUM | Silicone-DLIP | 1.253 | 0.323 | 7  |
| 9.6 | 2 | 2 | µg | mAUM | Silicone-DLIP | 0.713 | 0.305 | 8  |
| 9.6 | 2 | 2 | µg | mAUM | Silicone-DLIP | 1.037 | 0.396 | 9  |
| 9.6 | 2 | 2 | µg | mAUM | Silicone-DLIP | 1.031 | 0.318 | 10 |
| 9.6 | 2 | 2 | µg | mAUM | Silicone-DLIP | 0.928 | 0.305 | 11 |
| 9.6 | 2 | 2 | µg | mAUM | Silicone-DLIP | 0.747 | 0.316 | 12 |
| 9.6 | 2 | 2 | µg | mAUM | Silicone-DLIP | 0.741 | 0.362 | 13 |
| 9.6 | 2 | 2 | µg | mAUM | Silicone-DLIP | 1.007 | 0.449 | 14 |
| 9.6 | 2 | 2 | µg | mAUM | Silicone-DLIP | 0.726 | 0.268 | 15 |
| 9.6 | 2 | 2 | µg | mAUM | Silicone-DLIP | 0.908 | 0.329 | 16 |
| 9.6 | 2 | 2 | µg | mAUM | Silicone-DLIP | 0.732 | 0.267 | 17 |
| 9.6 | 2 | 2 | µg | mAUM | Silicone-DLIP | 0.91  | 0.306 | 18 |
| 9.6 | 2 | 2 | µg | mAUM | Silicone-DLIP | 1.235 | 0.283 | 19 |
| 9.6 | 2 | 2 | µg | mAUM | Silicone-DLIP | 1.357 | 0.193 | 20 |
| 9.6 | 2 | 2 | µg | mAUM | Silicone-DLIP | 1.053 | 0.322 | 21 |

|     |   |   |    |      |               |       |       |    |
|-----|---|---|----|------|---------------|-------|-------|----|
| 9.6 | 2 | 2 | µg | mAUM | Silicone-DLIP | 1.019 | 0.347 | 22 |
| 9.6 | 2 | 2 | µg | mAUM | Silicone-DLIP | 0.745 | 0.26  | 23 |
| 9.6 | 2 | 2 | µg | mAUM | Silicone-DLIP | 1.083 | 0.335 | 24 |
| 9.6 | 2 | 2 | µg | mAUM | Silicone-DLIP | 0.918 | 0.326 | 25 |
| 9.7 | 3 | 2 | µg | mAUM | Silicone-DLIP | 0.915 | 0.365 | 1  |
| 9.7 | 3 | 2 | µg | mAUM | Silicone-DLIP | 0.797 | 0.269 | 2  |
| 9.7 | 3 | 2 | µg | mAUM | Silicone-DLIP | 0.698 | 0.38  | 3  |
| 9.7 | 3 | 2 | µg | mAUM | Silicone-DLIP | 0.771 | 0.383 | 4  |
| 9.7 | 3 | 2 | µg | mAUM | Silicone-DLIP | 0.65  | 0.307 | 5  |
| 9.7 | 3 | 2 | µg | mAUM | Silicone-DLIP | 0.9   | 0.396 | 6  |
| 9.7 | 3 | 2 | µg | mAUM | Silicone-DLIP | 0.704 | 0.332 | 7  |
| 9.7 | 3 | 2 | µg | mAUM | Silicone-DLIP | 0.942 | 0.407 | 8  |
| 9.7 | 3 | 2 | µg | mAUM | Silicone-DLIP | 0.948 | 0.364 | 9  |
| 9.7 | 3 | 2 | µg | mAUM | Silicone-DLIP | 1.149 | 0.375 | 10 |
| 9.7 | 3 | 2 | µg | mAUM | Silicone-DLIP | 0.73  | 0.332 | 11 |
| 9.7 | 3 | 2 | µg | mAUM | Silicone-DLIP | 0.727 | 0.337 | 12 |
| 9.7 | 3 | 2 | µg | mAUM | Silicone-DLIP | 0.682 | 0.334 | 13 |
| 9.7 | 3 | 2 | µg | mAUM | Silicone-DLIP | 0.979 | 0.34  | 14 |
| 9.7 | 3 | 2 | µg | mAUM | Silicone-DLIP | 0.69  | 0.367 | 15 |
| 9.7 | 3 | 2 | µg | mAUM | Silicone-DLIP | 0.894 | 0.311 | 16 |
| 9.7 | 3 | 2 | µg | mAUM | Silicone-DLIP | 0.811 | 0.293 | 17 |
| 9.7 | 3 | 2 | µg | mAUM | Silicone-DLIP | 0.792 | 0.415 | 18 |
| 9.7 | 3 | 2 | µg | mAUM | Silicone-DLIP | 0.838 | 0.328 | 19 |
| 9.7 | 3 | 2 | µg | mAUM | Silicone-DLIP | 0.945 | 0.342 | 20 |
| 9.7 | 3 | 2 | µg | mAUM | Silicone-DLIP | 0.885 | 0.381 | 21 |
| 9.7 | 3 | 2 | µg | mAUM | Silicone-DLIP | 1.004 | 0.323 | 22 |
| 9.7 | 3 | 2 | µg | mAUM | Silicone-DLIP | 0.927 | 0.367 | 23 |
| 9.7 | 3 | 2 | µg | mAUM | Silicone-DLIP | 0.813 | 0.346 | 24 |
| 9.7 | 3 | 2 | µg | mAUM | Silicone-DLIP | 1.03  | 0.313 | 25 |
| 9.8 | 4 | 2 | µg | mAUM | Silicone-DLIP | 1.059 | 0.315 | 1  |
| 9.8 | 4 | 2 | µg | mAUM | Silicone-DLIP | 0.833 | 0.353 | 2  |
| 9.8 | 4 | 2 | µg | mAUM | Silicone-DLIP | 0.971 | 0.328 | 3  |
| 9.8 | 4 | 2 | µg | mAUM | Silicone-DLIP | 0.883 | 0.252 | 4  |
| 9.8 | 4 | 2 | µg | mAUM | Silicone-DLIP | 1.257 | 0.341 | 5  |
| 9.8 | 4 | 2 | µg | mAUM | Silicone-DLIP | 1.029 | 0.295 | 6  |
| 9.8 | 4 | 2 | µg | mAUM | Silicone-DLIP | 0.955 | 0.35  | 7  |
| 9.8 | 4 | 2 | µg | mAUM | Silicone-DLIP | 1.087 | 0.228 | 8  |
| 9.8 | 4 | 2 | µg | mAUM | Silicone-DLIP | 0.869 | 0.297 | 9  |
| 9.8 | 4 | 2 | µg | mAUM | Silicone-DLIP | 0.791 | 0.342 | 10 |
| 9.8 | 4 | 2 | µg | mAUM | Silicone-DLIP | 0.861 | 0.327 | 11 |
| 9.8 | 4 | 2 | µg | mAUM | Silicone-DLIP | 0.87  | 0.31  | 12 |
| 9.8 | 4 | 2 | µg | mAUM | Silicone-DLIP | 0.839 | 0.339 | 13 |
| 9.8 | 4 | 2 | µg | mAUM | Silicone-DLIP | 0.802 | 0.378 | 14 |
| 9.8 | 4 | 2 | µg | mAUM | Silicone-DLIP | 0.683 | 0.379 | 15 |
| 9.8 | 4 | 2 | µg | mAUM | Silicone-DLIP | 0.62  | 0.369 | 16 |
| 9.8 | 4 | 2 | µg | mAUM | Silicone-DLIP | 0.875 | 0.282 | 17 |
| 9.8 | 4 | 2 | µg | mAUM | Silicone-DLIP | 0.52  | 0.317 | 18 |
| 9.8 | 4 | 2 | µg | mAUM | Silicone-DLIP | 0.672 | 0.327 | 19 |
| 9.8 | 4 | 2 | µg | mAUM | Silicone-DLIP | 1.034 | 0.321 | 20 |
| 9.8 | 4 | 2 | µg | mAUM | Silicone-DLIP | 0.952 | 0.375 | 21 |

|      |   |   |    |      |                    |       |       |    |
|------|---|---|----|------|--------------------|-------|-------|----|
| 9.8  | 4 | 2 | µg | mAUM | Silicone-DLIP      | 0.727 | 0.271 | 22 |
| 9.8  | 4 | 2 | µg | mAUM | Silicone-DLIP      | 0.656 | 0.286 | 23 |
| 9.8  | 4 | 2 | µg | mAUM | Silicone-DLIP      | 1.148 | 0.365 | 24 |
| 9.8  | 4 | 2 | µg | mAUM | Silicone-DLIP      | 0.851 | 0.234 | 25 |
| 14.5 | 1 | 3 | µg | mAUM | Cellulose Membrane | 0.807 | 0.252 | 1  |
| 14.5 | 1 | 3 | µg | mAUM | Cellulose Membrane | 0.687 | 0.305 | 2  |
| 14.5 | 1 | 3 | µg | mAUM | Cellulose Membrane | 1.01  | 0.257 | 3  |
| 14.5 | 1 | 3 | µg | mAUM | Cellulose Membrane | 1.097 | 0.33  | 4  |
| 14.5 | 1 | 3 | µg | mAUM | Cellulose Membrane | 1.115 | 0.329 | 5  |
| 14.5 | 1 | 3 | µg | mAUM | Cellulose Membrane | 0.618 | 0.233 | 6  |
| 14.5 | 1 | 3 | µg | mAUM | Cellulose Membrane | 0.786 | 0.269 | 7  |
| 14.5 | 1 | 3 | µg | mAUM | Cellulose Membrane | 0.795 | 0.306 | 8  |
| 14.5 | 1 | 3 | µg | mAUM | Cellulose Membrane | 0.95  | 0.323 | 9  |
| 14.5 | 1 | 3 | µg | mAUM | Cellulose Membrane | 1.107 | 0.24  | 10 |
| 14.5 | 1 | 3 | µg | mAUM | Cellulose Membrane | 0.601 | 0.345 | 11 |
| 14.5 | 1 | 3 | µg | mAUM | Cellulose Membrane | 0.625 | 0.306 | 12 |
| 14.5 | 1 | 3 | µg | mAUM | Cellulose Membrane | 0.642 | 0.306 | 13 |
| 14.5 | 1 | 3 | µg | mAUM | Cellulose Membrane | 0.737 | 0.286 | 14 |
| 14.5 | 1 | 3 | µg | mAUM | Cellulose Membrane | 0.861 | 0.332 | 15 |
| 14.5 | 1 | 3 | µg | mAUM | Cellulose Membrane | 0.779 | 0.387 | 16 |
| 14.5 | 1 | 3 | µg | mAUM | Cellulose Membrane | 1.106 | 0.319 | 17 |
| 14.5 | 1 | 3 | µg | mAUM | Cellulose Membrane | 0.914 | 0.327 | 18 |
| 14.5 | 1 | 3 | µg | mAUM | Cellulose Membrane | 0.923 | 0.343 | 19 |
| 14.5 | 1 | 3 | µg | mAUM | Cellulose Membrane | 0.982 | 0.323 | 20 |
| 14.5 | 1 | 3 | µg | mAUM | Cellulose Membrane | 0.92  | 0.294 | 21 |
| 14.5 | 1 | 3 | µg | mAUM | Cellulose Membrane | 0.968 | 0.325 | 22 |
| 14.5 | 1 | 3 | µg | mAUM | Cellulose Membrane | 0.86  | 0.325 | 23 |

|      |   |   |    |      |                    |       |       |    |
|------|---|---|----|------|--------------------|-------|-------|----|
| 14.5 | 1 | 3 | µg | mAUM | Cellulose Membrane | 0.803 | 0.299 | 24 |
| 14.5 | 1 | 3 | µg | mAUM | Cellulose Membrane | 0.935 | 0.32  | 25 |
| 14.6 | 2 | 3 | µg | mAUM | Cellulose Membrane | 0.807 | 0.252 | 1  |
| 14.6 | 2 | 3 | µg | mAUM | Cellulose Membrane | 0.687 | 0.305 | 2  |
| 14.6 | 2 | 3 | µg | mAUM | Cellulose Membrane | 1.01  | 0.257 | 3  |
| 14.6 | 2 | 3 | µg | mAUM | Cellulose Membrane | 1.097 | 0.33  | 4  |
| 14.6 | 2 | 3 | µg | mAUM | Cellulose Membrane | 1.115 | 0.329 | 5  |
| 14.6 | 2 | 3 | µg | mAUM | Cellulose Membrane | 0.618 | 0.233 | 6  |
| 14.6 | 2 | 3 | µg | mAUM | Cellulose Membrane | 0.786 | 0.269 | 7  |
| 14.6 | 2 | 3 | µg | mAUM | Cellulose Membrane | 0.795 | 0.306 | 8  |
| 14.6 | 2 | 3 | µg | mAUM | Cellulose Membrane | 0.95  | 0.323 | 9  |
| 14.6 | 2 | 3 | µg | mAUM | Cellulose Membrane | 1.107 | 0.24  | 10 |
| 14.6 | 2 | 3 | µg | mAUM | Cellulose Membrane | 0.601 | 0.345 | 11 |
| 14.6 | 2 | 3 | µg | mAUM | Cellulose Membrane | 1.213 | 0.27  | 12 |
| 14.6 | 2 | 3 | µg | mAUM | Cellulose Membrane | 0.625 | 0.306 | 13 |
| 14.6 | 2 | 3 | µg | mAUM | Cellulose Membrane | 0.642 | 0.306 | 14 |
| 14.6 | 2 | 3 | µg | mAUM | Cellulose Membrane | 0.737 | 0.286 | 15 |
| 14.6 | 2 | 3 | µg | mAUM | Cellulose Membrane | 0.861 | 0.332 | 16 |
| 14.6 | 2 | 3 | µg | mAUM | Cellulose Membrane | 0.779 | 0.387 | 17 |
| 14.6 | 2 | 3 | µg | mAUM | Cellulose Membrane | 1.106 | 0.319 | 18 |
| 14.6 | 2 | 3 | µg | mAUM | Cellulose Membrane | 0.914 | 0.327 | 19 |
| 14.6 | 2 | 3 | µg | mAUM | Cellulose Membrane | 0.923 | 0.343 | 20 |
| 14.6 | 2 | 3 | µg | mAUM | Cellulose Membrane | 0.982 | 0.323 | 21 |
| 14.6 | 2 | 3 | µg | mAUM | Cellulose Membrane | 0.92  | 0.294 | 22 |
| 14.6 | 2 | 3 | µg | mAUM | Cellulose Membrane | 0.968 | 0.325 | 23 |

|      |   |   |    |      |                    |       |       |    |
|------|---|---|----|------|--------------------|-------|-------|----|
| 14.6 | 2 | 3 | µg | mAUM | Cellulose Membrane | 1.248 | 0.264 | 24 |
| 14.6 | 2 | 3 | µg | mAUM | Cellulose Membrane | 0.86  | 0.325 | 25 |
| 14.7 | 3 | 3 | µg | mAUM | Cellulose Membrane | 1.062 | 0.323 | 1  |
| 14.7 | 3 | 3 | µg | mAUM | Cellulose Membrane | 0.819 | 0.339 | 2  |
| 14.7 | 3 | 3 | µg | mAUM | Cellulose Membrane | 0.973 | 0.319 | 3  |
| 14.7 | 3 | 3 | µg | mAUM | Cellulose Membrane | 0.755 | 0.325 | 4  |
| 14.7 | 3 | 3 | µg | mAUM | Cellulose Membrane | 0.764 | 0.33  | 5  |
| 14.7 | 3 | 3 | µg | mAUM | Cellulose Membrane | 0.997 | 0.388 | 6  |
| 14.7 | 3 | 3 | µg | mAUM | Cellulose Membrane | 0.798 | 0.384 | 7  |
| 14.7 | 3 | 3 | µg | mAUM | Cellulose Membrane | 0.777 | 0.362 | 8  |
| 14.7 | 3 | 3 | µg | mAUM | Cellulose Membrane | 1.054 | 0.327 | 9  |
| 14.7 | 3 | 3 | µg | mAUM | Cellulose Membrane | 0.774 | 0.294 | 10 |
| 14.7 | 3 | 3 | µg | mAUM | Cellulose Membrane | 0.855 | 0.31  | 11 |
| 14.7 | 3 | 3 | µg | mAUM | Cellulose Membrane | 0.692 | 0.295 | 12 |
| 14.7 | 3 | 3 | µg | mAUM | Cellulose Membrane | 0.872 | 0.302 | 13 |
| 14.7 | 3 | 3 | µg | mAUM | Cellulose Membrane | 0.834 | 0.337 | 14 |
| 14.7 | 3 | 3 | µg | mAUM | Cellulose Membrane | 0.783 | 0.355 | 15 |
| 14.7 | 3 | 3 | µg | mAUM | Cellulose Membrane | 0.685 | 0.343 | 16 |
| 14.7 | 3 | 3 | µg | mAUM | Cellulose Membrane | 1.251 | 0.349 | 17 |
| 14.7 | 3 | 3 | µg | mAUM | Cellulose Membrane | 1.191 | 0.397 | 18 |
| 14.7 | 3 | 3 | µg | mAUM | Cellulose Membrane | 1.213 | 0.333 | 19 |
| 14.7 | 3 | 3 | µg | mAUM | Cellulose Membrane | 1.095 | 0.313 | 20 |
| 14.7 | 3 | 3 | µg | mAUM | Cellulose Membrane | 1.016 | 0.343 | 21 |
| 14.7 | 3 | 3 | µg | mAUM | Cellulose Membrane | 1.004 | 0.344 | 22 |
| 14.7 | 3 | 3 | µg | mAUM | Cellulose Membrane | 0.85  | 0.297 | 23 |

|      |   |   |    |      |                    |       |       |    |
|------|---|---|----|------|--------------------|-------|-------|----|
| 14.7 | 3 | 3 | µg | mAUM | Cellulose Membrane | 1.089 | 0.329 | 24 |
| 14.7 | 3 | 3 | µg | mAUM | Cellulose Membrane | 0.717 | 0.289 | 25 |
| 14.8 | 4 | 3 | µg | mAUM | Cellulose Membrane | 0.736 | 0.33  | 1  |
| 14.8 | 4 | 3 | µg | mAUM | Cellulose Membrane | 1.003 | 0.318 | 2  |
| 14.8 | 4 | 3 | µg | mAUM | Cellulose Membrane | 0.749 | 0.293 | 3  |
| 14.8 | 4 | 3 | µg | mAUM | Cellulose Membrane | 0.83  | 0.306 | 4  |
| 14.8 | 4 | 3 | µg | mAUM | Cellulose Membrane | 0.858 | 0.305 | 5  |
| 14.8 | 4 | 3 | µg | mAUM | Cellulose Membrane | 0.816 | 0.278 | 6  |
| 14.8 | 4 | 3 | µg | mAUM | Cellulose Membrane | 0.902 | 0.339 | 7  |
| 14.8 | 4 | 3 | µg | mAUM | Cellulose Membrane | 0.817 | 0.344 | 8  |
| 14.8 | 4 | 3 | µg | mAUM | Cellulose Membrane | 0.785 | 0.338 | 9  |
| 14.8 | 4 | 3 | µg | mAUM | Cellulose Membrane | 0.86  | 0.326 | 10 |
| 14.8 | 4 | 3 | µg | mAUM | Cellulose Membrane | 0.722 | 0.329 | 11 |
| 14.8 | 4 | 3 | µg | mAUM | Cellulose Membrane | 0.853 | 0.306 | 12 |
| 14.8 | 4 | 3 | µg | mAUM | Cellulose Membrane | 0.661 | 0.301 | 13 |
| 14.8 | 4 | 3 | µg | mAUM | Cellulose Membrane | 1.008 | 0.404 | 14 |
| 14.8 | 4 | 3 | µg | mAUM | Cellulose Membrane | 0.763 | 0.37  | 15 |
| 14.8 | 4 | 3 | µg | mAUM | Cellulose Membrane | 0.748 | 0.344 | 16 |
| 14.8 | 4 | 3 | µg | mAUM | Cellulose Membrane | 1.067 | 0.288 | 17 |
| 14.8 | 4 | 3 | µg | mAUM | Cellulose Membrane | 0.77  | 0.293 | 18 |
| 14.8 | 4 | 3 | µg | mAUM | Cellulose Membrane | 0.887 | 0.315 | 19 |
| 14.8 | 4 | 3 | µg | mAUM | Cellulose Membrane | 0.777 | 0.278 | 20 |
| 14.8 | 4 | 3 | µg | mAUM | Cellulose Membrane | 1.017 | 0.291 | 21 |
| 14.8 | 4 | 3 | µg | mAUM | Cellulose Membrane | 0.628 | 0.296 | 22 |
| 14.8 | 4 | 3 | µg | mAUM | Cellulose Membrane | 0.935 | 0.359 | 23 |

|      |   |   |    |      |                    |       |       |    |
|------|---|---|----|------|--------------------|-------|-------|----|
| 14.8 | 4 | 3 | µg | mAUM | Cellulose Membrane | 0.708 | 0.274 | 24 |
| 14.8 | 4 | 3 | µg | mAUM | Cellulose Membrane | 0.942 | 0.33  | 25 |
| 15.1 | 1 | 3 | µg | mAUM | Silicone           | 0.809 | 0.333 | 1  |
| 15.1 | 1 | 3 | µg | mAUM | Silicone           | 1.026 | 0.273 | 2  |
| 15.1 | 1 | 3 | µg | mAUM | Silicone           | 0.954 | 0.321 | 3  |
| 15.1 | 1 | 3 | µg | mAUM | Silicone           | 0.717 | 0.345 | 4  |
| 15.1 | 1 | 3 | µg | mAUM | Silicone           | 1.13  | 0.269 | 5  |
| 15.1 | 1 | 3 | µg | mAUM | Silicone           | 0.76  | 0.309 | 6  |
| 15.1 | 1 | 3 | µg | mAUM | Silicone           | 0.596 | 0.313 | 7  |
| 15.1 | 1 | 3 | µg | mAUM | Silicone           | 0.907 | 0.369 | 8  |
| 15.1 | 1 | 3 | µg | mAUM | Silicone           | 1.395 | 0.337 | 9  |
| 15.1 | 1 | 3 | µg | mAUM | Silicone           | 0.867 | 0.348 | 10 |
| 15.1 | 1 | 3 | µg | mAUM | Silicone           | 1.331 | 0.333 | 11 |
| 15.1 | 1 | 3 | µg | mAUM | Silicone           | 0.747 | 0.339 | 12 |
| 15.1 | 1 | 3 | µg | mAUM | Silicone           | 0.89  | 0.319 | 13 |
| 15.1 | 1 | 3 | µg | mAUM | Silicone           | 1.248 | 0.289 | 14 |
| 15.1 | 1 | 3 | µg | mAUM | Silicone           | 0.941 | 0.297 | 15 |
| 15.1 | 1 | 3 | µg | mAUM | Silicone           | 0.626 | 0.313 | 16 |
| 15.1 | 1 | 3 | µg | mAUM | Silicone           | 0.743 | 0.296 | 17 |
| 15.1 | 1 | 3 | µg | mAUM | Silicone           | 0.868 | 0.342 | 18 |
| 15.1 | 1 | 3 | µg | mAUM | Silicone           | 1.199 | 0.348 | 19 |
| 15.1 | 1 | 3 | µg | mAUM | Silicone           | 0.925 | 0.321 | 20 |
| 15.1 | 1 | 3 | µg | mAUM | Silicone           | 0.85  | 0.363 | 21 |
| 15.1 | 1 | 3 | µg | mAUM | Silicone           | 1.096 | 0.345 | 22 |
| 15.1 | 1 | 3 | µg | mAUM | Silicone           | 0.822 | 0.329 | 23 |
| 15.1 | 1 | 3 | µg | mAUM | Silicone           | 0.759 | 0.313 | 24 |
| 15.1 | 1 | 3 | µg | mAUM | Silicone           | 0.826 | 0.304 | 25 |
| 15.2 | 2 | 3 | µg | mAUM | Silicone           | 0.995 | 0.28  | 1  |
| 15.2 | 2 | 3 | µg | mAUM | Silicone           | 0.837 | 0.323 | 2  |
| 15.2 | 2 | 3 | µg | mAUM | Silicone           | 1.094 | 0.324 | 3  |
| 15.2 | 2 | 3 | µg | mAUM | Silicone           | 0.899 | 0.33  | 4  |
| 15.2 | 2 | 3 | µg | mAUM | Silicone           | 0.746 | 0.325 | 5  |
| 15.2 | 2 | 3 | µg | mAUM | Silicone           | 0.941 | 0.398 | 6  |
| 15.2 | 2 | 3 | µg | mAUM | Silicone           | 0.738 | 0.325 | 7  |
| 15.2 | 2 | 3 | µg | mAUM | Silicone           | 0.675 | 0.327 | 8  |
| 15.2 | 2 | 3 | µg | mAUM | Silicone           | 0.699 | 0.367 | 9  |
| 15.2 | 2 | 3 | µg | mAUM | Silicone           | 0.781 | 0.31  | 10 |
| 15.2 | 2 | 3 | µg | mAUM | Silicone           | 0.699 | 0.29  | 11 |
| 15.2 | 2 | 3 | µg | mAUM | Silicone           | 0.625 | 0.268 | 12 |
| 15.2 | 2 | 3 | µg | mAUM | Silicone           | 0.753 | 0.336 | 13 |
| 15.2 | 2 | 3 | µg | mAUM | Silicone           | 0.663 | 0.325 | 14 |
| 15.2 | 2 | 3 | µg | mAUM | Silicone           | 1.258 | 0.374 | 15 |
| 15.2 | 2 | 3 | µg | mAUM | Silicone           | 0.894 | 0.291 | 16 |
| 15.2 | 2 | 3 | µg | mAUM | Silicone           | 0.833 | 0.34  | 17 |
| 15.2 | 2 | 3 | µg | mAUM | Silicone           | 0.833 | 0.328 | 18 |
| 15.2 | 2 | 3 | µg | mAUM | Silicone           | 1.034 | 0.297 | 19 |
| 15.2 | 2 | 3 | µg | mAUM | Silicone           | 0.713 | 0.362 | 20 |
| 15.2 | 2 | 3 | µg | mAUM | Silicone           | 0.673 | 0.366 | 21 |

|      |   |   |    |      |          |       |       |    |
|------|---|---|----|------|----------|-------|-------|----|
| 15.2 | 2 | 3 | µg | mAUM | Silicone | 1.065 | 0.317 | 22 |
| 15.2 | 2 | 3 | µg | mAUM | Silicone | 0.872 | 0.281 | 23 |
| 15.2 | 2 | 3 | µg | mAUM | Silicone | 0.781 | 0.285 | 24 |
| 15.2 | 2 | 3 | µg | mAUM | Silicone | 0.84  | 0.325 | 25 |
| 15.3 | 3 | 3 | µg | mAUM | Silicone | 0.874 | 0.29  | 1  |
| 15.3 | 3 | 3 | µg | mAUM | Silicone | 1.062 | 0.274 | 2  |
| 15.3 | 3 | 3 | µg | mAUM | Silicone | 0.754 | 0.289 | 3  |
| 15.3 | 3 | 3 | µg | mAUM | Silicone | 0.682 | 0.251 | 4  |
| 15.3 | 3 | 3 | µg | mAUM | Silicone | 0.745 | 0.287 | 5  |
| 15.3 | 3 | 3 | µg | mAUM | Silicone | 0.946 | 0.34  | 6  |
| 15.3 | 3 | 3 | µg | mAUM | Silicone | 0.745 | 0.33  | 7  |
| 15.3 | 3 | 3 | µg | mAUM | Silicone | 0.86  | 0.305 | 8  |
| 15.3 | 3 | 3 | µg | mAUM | Silicone | 0.726 | 0.353 | 9  |
| 15.3 | 3 | 3 | µg | mAUM | Silicone | 0.669 | 0.357 | 10 |
| 15.3 | 3 | 3 | µg | mAUM | Silicone | 0.73  | 0.345 | 11 |
| 15.3 | 3 | 3 | µg | mAUM | Silicone | 0.796 | 0.298 | 12 |
| 15.3 | 3 | 3 | µg | mAUM | Silicone | 1.009 | 0.283 | 13 |
| 15.3 | 3 | 3 | µg | mAUM | Silicone | 0.661 | 0.305 | 14 |
| 15.3 | 3 | 3 | µg | mAUM | Silicone | 1.191 | 0.317 | 15 |
| 15.3 | 3 | 3 | µg | mAUM | Silicone | 0.991 | 0.319 | 16 |
| 15.3 | 3 | 3 | µg | mAUM | Silicone | 0.881 | 0.287 | 17 |
| 15.3 | 3 | 3 | µg | mAUM | Silicone | 0.866 | 0.305 | 18 |
| 15.3 | 3 | 3 | µg | mAUM | Silicone | 0.81  | 0.323 | 19 |
| 15.3 | 3 | 3 | µg | mAUM | Silicone | 0.761 | 0.348 | 20 |
| 15.3 | 3 | 3 | µg | mAUM | Silicone | 0.602 | 0.317 | 21 |
| 15.3 | 3 | 3 | µg | mAUM | Silicone | 0.483 | 0.289 | 22 |
| 15.3 | 3 | 3 | µg | mAUM | Silicone | 1.047 | 0.308 | 23 |
| 15.3 | 3 | 3 | µg | mAUM | Silicone | 0.857 | 0.253 | 24 |
| 15.3 | 3 | 3 | µg | mAUM | Silicone | 0.705 | 0.234 | 25 |
| 15.4 | 4 | 3 | µg | mAUM | Silicone | 0.825 | 0.272 | 1  |
| 15.4 | 4 | 3 | µg | mAUM | Silicone | 0.822 | 0.34  | 2  |
| 15.4 | 4 | 3 | µg | mAUM | Silicone | 0.835 | 0.314 | 3  |
| 15.4 | 4 | 3 | µg | mAUM | Silicone | 1.425 | 0.377 | 4  |
| 15.4 | 4 | 3 | µg | mAUM | Silicone | 1.027 | 0.28  | 5  |
| 15.4 | 4 | 3 | µg | mAUM | Silicone | 1.024 | 0.247 | 6  |
| 15.4 | 4 | 3 | µg | mAUM | Silicone | 1.274 | 0.235 | 7  |
| 15.4 | 4 | 3 | µg | mAUM | Silicone | 0.86  | 0.291 | 8  |
| 15.4 | 4 | 3 | µg | mAUM | Silicone | 1.01  | 0.29  | 9  |
| 15.4 | 4 | 3 | µg | mAUM | Silicone | 0.66  | 0.365 | 10 |
| 15.4 | 4 | 3 | µg | mAUM | Silicone | 1.028 | 0.295 | 11 |
| 15.4 | 4 | 3 | µg | mAUM | Silicone | 1.093 | 0.276 | 12 |
| 15.4 | 4 | 3 | µg | mAUM | Silicone | 0.689 | 0.295 | 13 |
| 15.4 | 4 | 3 | µg | mAUM | Silicone | 0.58  | 0.266 | 14 |
| 15.4 | 4 | 3 | µg | mAUM | Silicone | 0.995 | 0.309 | 15 |
| 15.4 | 4 | 3 | µg | mAUM | Silicone | 0.551 | 0.338 | 16 |
| 15.4 | 4 | 3 | µg | mAUM | Silicone | 0.701 | 0.261 | 17 |
| 15.4 | 4 | 3 | µg | mAUM | Silicone | 0.68  | 0.235 | 18 |
| 15.4 | 4 | 3 | µg | mAUM | Silicone | 1.118 | 0.28  | 19 |
| 15.4 | 4 | 3 | µg | mAUM | Silicone | 1.091 | 0.323 | 20 |
| 15.4 | 4 | 3 | µg | mAUM | Silicone | 0.825 | 0.352 | 21 |

|      |   |   |    |      |               |       |       |    |
|------|---|---|----|------|---------------|-------|-------|----|
| 15.4 | 4 | 3 | µg | mAUM | Silicone      | 0.737 | 0.314 | 22 |
| 15.4 | 4 | 3 | µg | mAUM | Silicone      | 0.697 | 0.295 | 23 |
| 15.4 | 4 | 3 | µg | mAUM | Silicone      | 0.694 | 0.284 | 24 |
| 15.4 | 4 | 3 | µg | mAUM | Silicone      | 1.114 | 0.29  | 25 |
| 15.5 | 1 | 3 | µg | mAUM | Silicone-DLIP | 0.93  | 0.29  | 1  |
| 15.5 | 1 | 3 | µg | mAUM | Silicone-DLIP | 0.586 | 0.321 | 2  |
| 15.5 | 1 | 3 | µg | mAUM | Silicone-DLIP | 0.51  | 0.261 | 3  |
| 15.5 | 1 | 3 | µg | mAUM | Silicone-DLIP | 0.882 | 0.321 | 4  |
| 15.5 | 1 | 3 | µg | mAUM | Silicone-DLIP | 0.725 | 0.274 | 5  |
| 15.5 | 1 | 3 | µg | mAUM | Silicone-DLIP | 0.87  | 0.327 | 6  |
| 15.5 | 1 | 3 | µg | mAUM | Silicone-DLIP | 0.899 | 0.369 | 7  |
| 15.5 | 1 | 3 | µg | mAUM | Silicone-DLIP | 0.821 | 0.353 | 8  |
| 15.5 | 1 | 3 | µg | mAUM | Silicone-DLIP | 0.761 | 0.277 | 9  |
| 15.5 | 1 | 3 | µg | mAUM | Silicone-DLIP | 0.887 | 0.377 | 10 |
| 15.5 | 1 | 3 | µg | mAUM | Silicone-DLIP | 1.242 | 0.297 | 11 |
| 15.5 | 1 | 3 | µg | mAUM | Silicone-DLIP | 0.914 | 0.298 | 12 |
| 15.5 | 1 | 3 | µg | mAUM | Silicone-DLIP | 0.906 | 0.269 | 13 |
| 15.5 | 1 | 3 | µg | mAUM | Silicone-DLIP | 0.955 | 0.329 | 14 |
| 15.5 | 1 | 3 | µg | mAUM | Silicone-DLIP | 0.669 | 0.329 | 15 |
| 15.5 | 1 | 3 | µg | mAUM | Silicone-DLIP | 0.567 | 0.25  | 16 |
| 15.5 | 1 | 3 | µg | mAUM | Silicone-DLIP | 0.703 | 0.309 | 17 |
| 15.5 | 1 | 3 | µg | mAUM | Silicone-DLIP | 0.906 | 0.348 | 18 |
| 15.5 | 1 | 3 | µg | mAUM | Silicone-DLIP | 0.838 | 0.329 | 19 |
| 15.5 | 1 | 3 | µg | mAUM | Silicone-DLIP | 0.778 | 0.414 | 20 |
| 15.5 | 1 | 3 | µg | mAUM | Silicone-DLIP | 0.826 | 0.348 | 21 |
| 15.5 | 1 | 3 | µg | mAUM | Silicone-DLIP | 0.762 | 0.305 | 22 |
| 15.5 | 1 | 3 | µg | mAUM | Silicone-DLIP | 0.676 | 0.427 | 23 |
| 15.5 | 1 | 3 | µg | mAUM | Silicone-DLIP | 0.717 | 0.258 | 24 |
| 15.5 | 1 | 3 | µg | mAUM | Silicone-DLIP | 0.749 | 0.294 | 25 |
| 15.6 | 2 | 3 | µg | mAUM | Silicone-DLIP | 0.704 | 0.362 | 1  |
| 15.6 | 2 | 3 | µg | mAUM | Silicone-DLIP | 0.974 | 0.321 | 2  |
| 15.6 | 2 | 3 | µg | mAUM | Silicone-DLIP | 0.655 | 0.302 | 3  |
| 15.6 | 2 | 3 | µg | mAUM | Silicone-DLIP | 0.838 | 0.295 | 4  |
| 15.6 | 2 | 3 | µg | mAUM | Silicone-DLIP | 0.726 | 0.323 | 5  |
| 15.6 | 2 | 3 | µg | mAUM | Silicone-DLIP | 0.799 | 0.289 | 6  |
| 15.6 | 2 | 3 | µg | mAUM | Silicone-DLIP | 0.62  | 0.303 | 7  |
| 15.6 | 2 | 3 | µg | mAUM | Silicone-DLIP | 0.607 | 0.307 | 8  |
| 15.6 | 2 | 3 | µg | mAUM | Silicone-DLIP | 0.953 | 0.294 | 9  |
| 15.6 | 2 | 3 | µg | mAUM | Silicone-DLIP | 0.745 | 0.328 | 10 |
| 15.6 | 2 | 3 | µg | mAUM | Silicone-DLIP | 1.04  | 0.287 | 11 |
| 15.6 | 2 | 3 | µg | mAUM | Silicone-DLIP | 1.023 | 0.323 | 12 |
| 15.6 | 2 | 3 | µg | mAUM | Silicone-DLIP | 0.57  | 0.28  | 13 |
| 15.6 | 2 | 3 | µg | mAUM | Silicone-DLIP | 0.686 | 0.249 | 14 |
| 15.6 | 2 | 3 | µg | mAUM | Silicone-DLIP | 0.807 | 0.252 | 15 |
| 15.6 | 2 | 3 | µg | mAUM | Silicone-DLIP | 0.888 | 0.305 | 16 |
| 15.6 | 2 | 3 | µg | mAUM | Silicone-DLIP | 1.283 | 0.318 | 17 |
| 15.6 | 2 | 3 | µg | mAUM | Silicone-DLIP | 0.872 | 0.33  | 18 |
| 15.6 | 2 | 3 | µg | mAUM | Silicone-DLIP | 0.621 | 0.369 | 19 |
| 15.6 | 2 | 3 | µg | mAUM | Silicone-DLIP | 1.111 | 0.257 | 20 |
| 15.6 | 2 | 3 | µg | mAUM | Silicone-DLIP | 0.731 | 0.309 | 21 |

|      |   |   |    |      |               |       |       |    |
|------|---|---|----|------|---------------|-------|-------|----|
| 15.6 | 2 | 3 | µg | mAUM | Silicone-DLIP | 0.86  | 0.269 | 22 |
| 15.6 | 2 | 3 | µg | mAUM | Silicone-DLIP | 0.862 | 0.337 | 23 |
| 15.6 | 2 | 3 | µg | mAUM | Silicone-DLIP | 0.791 | 0.305 | 24 |
| 15.6 | 2 | 3 | µg | mAUM | Silicone-DLIP | 0.766 | 0.345 | 25 |
| 15.7 | 3 | 3 | µg | mAUM | Silicone-DLIP | 0.856 | 0.314 | 1  |
| 15.7 | 3 | 3 | µg | mAUM | Silicone-DLIP | 0.867 | 0.259 | 2  |
| 15.7 | 3 | 3 | µg | mAUM | Silicone-DLIP | 0.659 | 0.296 | 3  |
| 15.7 | 3 | 3 | µg | mAUM | Silicone-DLIP | 0.827 | 0.344 | 4  |
| 15.7 | 3 | 3 | µg | mAUM | Silicone-DLIP | 0.618 | 0.309 | 5  |
| 15.7 | 3 | 3 | µg | mAUM | Silicone-DLIP | 0.481 | 0.261 | 6  |
| 15.7 | 3 | 3 | µg | mAUM | Silicone-DLIP | 0.686 | 0.317 | 7  |
| 15.7 | 3 | 3 | µg | mAUM | Silicone-DLIP | 0.928 | 0.336 | 8  |
| 15.7 | 3 | 3 | µg | mAUM | Silicone-DLIP | 0.572 | 0.286 | 9  |
| 15.7 | 3 | 3 | µg | mAUM | Silicone-DLIP | 0.821 | 0.323 | 10 |
| 15.7 | 3 | 3 | µg | mAUM | Silicone-DLIP | 0.807 | 0.255 | 11 |
| 15.7 | 3 | 3 | µg | mAUM | Silicone-DLIP | 0.601 | 0.317 | 12 |
| 15.7 | 3 | 3 | µg | mAUM | Silicone-DLIP | 0.685 | 0.272 | 13 |
| 15.7 | 3 | 3 | µg | mAUM | Silicone-DLIP | 0.845 | 0.278 | 14 |
| 15.7 | 3 | 3 | µg | mAUM | Silicone-DLIP | 0.694 | 0.324 | 15 |
| 15.7 | 3 | 3 | µg | mAUM | Silicone-DLIP | 0.776 | 0.317 | 16 |
| 15.7 | 3 | 3 | µg | mAUM | Silicone-DLIP | 0.975 | 0.266 | 17 |
| 15.7 | 3 | 3 | µg | mAUM | Silicone-DLIP | 0.758 | 0.329 | 18 |
| 15.7 | 3 | 3 | µg | mAUM | Silicone-DLIP | 1.032 | 0.332 | 19 |
| 15.7 | 3 | 3 | µg | mAUM | Silicone-DLIP | 0.817 | 0.326 | 20 |
| 15.7 | 3 | 3 | µg | mAUM | Silicone-DLIP | 0.904 | 0.363 | 21 |
| 15.7 | 3 | 3 | µg | mAUM | Silicone-DLIP | 0.991 | 0.289 | 22 |
| 15.7 | 3 | 3 | µg | mAUM | Silicone-DLIP | 1.527 | 0.333 | 23 |
| 15.7 | 3 | 3 | µg | mAUM | Silicone-DLIP | 1.042 | 0.356 | 24 |
| 15.7 | 3 | 3 | µg | mAUM | Silicone-DLIP | 1.169 | 0.283 | 25 |
| 15.8 | 4 | 3 | µg | mAUM | Silicone-DLIP | 1.019 | 0.289 | 1  |
| 15.8 | 4 | 3 | µg | mAUM | Silicone-DLIP | 0.77  | 0.29  | 2  |
| 15.8 | 4 | 3 | µg | mAUM | Silicone-DLIP | 0.943 | 0.292 | 3  |
| 15.8 | 4 | 3 | µg | mAUM | Silicone-DLIP | 0.7   | 0.287 | 4  |
| 15.8 | 4 | 3 | µg | mAUM | Silicone-DLIP | 1.092 | 0.276 | 5  |
| 15.8 | 4 | 3 | µg | mAUM | Silicone-DLIP | 1.026 | 0.292 | 6  |
| 15.8 | 4 | 3 | µg | mAUM | Silicone-DLIP | 0.778 | 0.298 | 7  |
| 15.8 | 4 | 3 | µg | mAUM | Silicone-DLIP | 0.821 | 0.269 | 8  |
| 15.8 | 4 | 3 | µg | mAUM | Silicone-DLIP | 1.138 | 0.241 | 9  |
| 15.8 | 4 | 3 | µg | mAUM | Silicone-DLIP | 0.881 | 0.307 | 10 |
| 15.8 | 4 | 3 | µg | mAUM | Silicone-DLIP | 1.165 | 0.25  | 11 |
| 15.8 | 4 | 3 | µg | mAUM | Silicone-DLIP | 0.779 | 0.336 | 12 |
| 15.8 | 4 | 3 | µg | mAUM | Silicone-DLIP | 1.003 | 0.283 | 13 |
| 15.8 | 4 | 3 | µg | mAUM | Silicone-DLIP | 0.674 | 0.302 | 14 |
| 15.8 | 4 | 3 | µg | mAUM | Silicone-DLIP | 0.729 | 0.29  | 15 |
| 15.8 | 4 | 3 | µg | mAUM | Silicone-DLIP | 1.026 | 0.25  | 16 |
| 15.8 | 4 | 3 | µg | mAUM | Silicone-DLIP | 0.65  | 0.315 | 17 |
| 15.8 | 4 | 3 | µg | mAUM | Silicone-DLIP | 0.984 | 0.269 | 18 |
| 15.8 | 4 | 3 | µg | mAUM | Silicone-DLIP | 0.935 | 0.377 | 19 |
| 15.8 | 4 | 3 | µg | mAUM | Silicone-DLIP | 0.822 | 0.363 | 20 |
| 15.8 | 4 | 3 | µg | mAUM | Silicone-DLIP | 1.103 | 0.305 | 21 |

|      |   |   |    |      |               |       |       |    |
|------|---|---|----|------|---------------|-------|-------|----|
| 15.8 | 4 | 3 | µg | mAUM | Silicone-DLIP | 0.961 | 0.333 | 22 |
| 15.8 | 4 | 3 | µg | mAUM | Silicone-DLIP | 0.535 | 0.321 | 23 |
| 15.8 | 4 | 3 | µg | mAUM | Silicone-DLIP | 0.762 | 0.323 | 24 |
| 15.8 | 4 | 3 | µg | mAUM | Silicone-DLIP | 1.238 | 0.336 | 25 |
